# Supplementary material for: PBMDA: A novel and effective path-based computational model for miRNA-disease association prediction
Source: PLoS Comput Biol. 2017 Mar 24;13(3):e1005455. doi: 10.1371/journal.pcbi.1005455 (PMC5384769; doi:10.1371/journal.pcbi.1005455)
Supplement: S4 Table — (XLSX) [file pcbi.1005455.s004.xlsx]

## Sheet: Sheet1
1	0.4768	0	0.3535	0.5444	0.4827	0.49	0.4966	0.4766	0.6392	0.3985	0.3415	0.4001	0.463	0.5608	0.4694	0.2275	0.4421	0.4504	0.042	0	0.3564	0.5891	0.6372	0.4119	0	0.0591	0.5529	0.4262	0.3203	0.3019	0.3368	0.4155	0.2175	0.5234	0.4515	0.5932	0.5264	0.455	0.397	0.4889	0.5482	0.5529	0.5897	0.5415	0.3878	0.5685	0.4296	0.0583	0.2323
0.4768	1	0	0.2898	0.4027	0.4747	0.5249	0.3265	0.4871	0.4227	0.3234	0.2403	0.272	0.3594	0.5266	0.4789	0.2744	0.3642	0.3604	0.0514	0	0.4067	0.4727	0.4205	0.4369	0	0.0624	0.3975	0.3702	0.3298	0.3474	0.4445	0.6106	0.2217	0.3803	0.2586	0.3744	0.4733	0.5797	0.4525	0.5465	0.5759	0.3027	0.5768	0.4309	0.2627	0.3317	0.4201	0.0237	0.1204
0	0	1	0	0	0	0	0	0	0	0	0	0	0	0	0	0	0	0	0	0	0	0	0	0	0	0	0	0	0	0	0	0	0	0	0	0	0	0	0	0	0	0	0	0	0	0	0	0	0
0.3535	0.2898	0	1	0.4206	0.4175	0.3094	0.192	0.2212	0.3158	0.3121	0.1282	0.117	0.1924	0.2266	0.0984	0.0488	0.2863	0.1976	0.2906	0	0.3957	0.1299	0.2111	0.1007	0	0.0654	0.2271	0.1186	0.1487	0.3622	0.3009	0.308	0.2203	0.1985	0.456	0.2934	0.2745	0.3616	0.475	0.1967	0.3481	0.2382	0.4297	0.0897	0.1599	0.3918	0.1589	0.2706	0.0716
0.5444	0.4027	0	0.4206	1	0.8054	0.5415	0.4388	0.2786	0.4452	0.386	0.4298	0.5059	0.4308	0.403	0.3949	0.2208	0.4744	0.5237	0.0354	0	0.2492	0.5023	0.5062	0.2239	0	0.0479	0.6164	0.2829	0.2357	0.2201	0.3952	0.3328	0.1721	0.3386	0.4872	0.4378	0.4087	0.4415	0.2377	0.358	0.4546	0.5572	0.3818	0.4468	0.374	0.4336	0.4621	0.3408	0.0984
0.4827	0.4747	0	0.4175	0.8054	1	0.5544	0.4374	0.3663	0.5168	0.3221	0.433	0.481	0.4785	0.356	0.333	0.2406	0.4602	0.4924	0.0331	0	0.4578	0.4904	0.5469	0.2975	0	0.044	0.6982	0.4947	0.3086	0.2996	0.6169	0.4183	0.183	0.3373	0.4195	0.3691	0.4598	0.4347	0.3052	0.3532	0.5205	0.6446	0.3776	0.3566	0.4574	0.5368	0.5272	0.2193	0.1915
0.49	0.5249	0	0.3094	0.5415	0.5544	1	0.5847	0.4839	0.6218	0.509	0.4837	0.5782	0.601	0.5287	0.5473	0.2276	0.4908	0.6064	0.1187	0	0.4124	0.4719	0.5468	0.376	0	0.0313	0.6683	0.4522	0.3122	0.3171	0.5315	0.4665	0.3013	0.4631	0.388	0.5281	0.6224	0.5681	0.3988	0.3706	0.503	0.6088	0.5001	0.4869	0.5529	0.5093	0.5801	0.1457	0.2218
0.4966	0.3265	0	0.192	0.4388	0.4374	0.5847	1	0.5363	0.6609	0.3988	0.3831	0.4574	0.4504	0.3508	0.3637	0.2259	0.3527	0.4988	0.0147	0	0.4653	0.4365	0.503	0.3081	0	0.0146	0.4982	0.4049	0.2412	0.3694	0.5507	0.3342	0.3568	0.5809	0.2605	0.7117	0.7804	0.5175	0.3967	0.4015	0.4248	0.5588	0.4051	0.4181	0.4501	0.5349	0.6205	0.0768	0.3456
0.4766	0.4871	0	0.2212	0.2786	0.3663	0.4839	0.5363	1	0.8005	0.3394	0.3013	0.3156	0.4038	0.3619	0.2932	0.1063	0.3957	0.4532	0.0118	0	0.3807	0.2481	0.6368	0.3257	0	0.0395	0.377	0.3871	0.2386	0.3837	0.403	0.439	0.1801	0.4819	0.2081	0.3926	0.4976	0.3638	0.4538	0.2521	0.4355	0.3972	0.46	0.3172	0.3292	0.4641	0.2956	0.0212	0.2368
0.6392	0.4227	0	0.3158	0.4452	0.5168	0.6218	0.6609	0.8005	1	0.3627	0.4244	0.501	0.5135	0.4593	0.3736	0.122	0.5445	0.5791	0.011	0	0.5254	0.3618	0.7654	0.3552	0	0.0388	0.5887	0.4464	0.3668	0.4132	0.5626	0.4531	0.2479	0.6571	0.3054	0.6032	0.6695	0.4511	0.5373	0.3023	0.4791	0.6133	0.4802	0.4266	0.4796	0.645	0.5288	0.0596	0.2529
0.3985	0.3234	0	0.3121	0.386	0.3221	0.509	0.3988	0.3394	0.3627	1	0.325	0.4418	0.4262	0.4059	0.3129	0.3485	0.3075	0.3871	0.1821	0	0.375	0.2828	0.4366	0.2334	0	0.0535	0.4257	0.2238	0.2293	0.2494	0.3462	0.3544	0.0788	0.21	0.547	0.2467	0.2414	0.3538	0.2173	0.2363	0.3362	0.4219	0.3802	0.2499	0.3696	0.4894	0.2517	0.3113	0.3119
0.3415	0.2403	0	0.1282	0.4298	0.433	0.4837	0.3831	0.3013	0.4244	0.325	1	0.6693	0.4276	0.2512	0.2438	0.0686	0.4989	0.4971	0.0265	0	0.3046	0.2892	0.2914	0.0986	0	0.0185	0.4906	0.4196	0.2424	0.1097	0.313	0.1026	0.3005	0.2863	0.3463	0.3986	0.376	0.3676	0.1548	0.1995	0.3335	0.4972	0.1948	0.219	0.4593	0.3571	0.374	0.2395	0.0933
0.4001	0.272	0	0.117	0.5059	0.481	0.5782	0.4574	0.3156	0.501	0.4418	0.6693	1	0.476	0.3259	0.3516	0.1421	0.4454	0.6489	0.0214	0	0.2544	0.3532	0.5475	0.2653	0	0.0334	0.6223	0.2767	0.3048	0.1602	0.3427	0.2668	0.1897	0.4203	0.3813	0.3616	0.4178	0.4386	0.226	0.2624	0.3389	0.5582	0.3258	0.3604	0.4279	0.4425	0.3981	0.2945	0.0924
0.463	0.3594	0	0.1924	0.4308	0.4785	0.601	0.4504	0.4038	0.5135	0.4262	0.4276	0.476	1	0.4874	0.4078	0.2229	0.4586	0.5728	0.0537	0	0.4225	0.3825	0.479	0.2953	0	0.0457	0.6103	0.5273	0.2748	0.2477	0.4114	0.3106	0.2608	0.291	0.3858	0.3591	0.4329	0.3805	0.3301	0.2986	0.475	0.5548	0.3767	0.3122	0.5462	0.4809	0.4033	0.1298	0.2228
0.5608	0.5266	0	0.2266	0.403	0.356	0.5287	0.3508	0.3619	0.4593	0.4059	0.2512	0.3259	0.4874	1	0.7649	0.3021	0.3433	0.4132	0.1544	0	0.2836	0.362	0.4799	0.3219	0	0.0989	0.4471	0.3595	0.4462	0.2805	0.2161	0.3952	0.2063	0.4518	0.3407	0.4909	0.4937	0.4467	0.307	0.3819	0.4878	0.3756	0.4802	0.4718	0.3261	0.3865	0.3331	0.0238	0.1092
0.4694	0.4789	0	0.0984	0.3949	0.333	0.5473	0.3637	0.2932	0.3736	0.3129	0.2438	0.3516	0.4078	0.7649	1	0.2472	0.2919	0.4123	0.1995	0	0.191	0.4555	0.4139	0.4038	0	0.1013	0.4103	0.4008	0.4055	0.1374	0.1878	0.4003	0.2676	0.507	0.3377	0.4576	0.4663	0.4906	0.2416	0.4778	0.4881	0.3037	0.5007	0.6131	0.3304	0.2812	0.4375	0.0315	0.1194
0.2275	0.2744	0	0.0488	0.2208	0.2406	0.2276	0.2259	0.1063	0.122	0.3485	0.0686	0.1421	0.2229	0.3021	0.2472	1	0.103	0.091	0.0476	0	0.2762	0.3433	0.1997	0.337	0	0.0256	0.2275	0.1257	0.4242	0.341	0.2982	0.3386	0.0625	0.0535	0.358	0.0908	0.1091	0.2399	0.0959	0.3387	0.2376	0.1698	0.2145	0.2783	0.1669	0.1834	0.2637	0.0071	0.3762
0.4421	0.3642	0	0.2863	0.4744	0.4602	0.4908	0.3527	0.3957	0.5445	0.3075	0.4989	0.4454	0.4586	0.3433	0.2919	0.103	1	0.5774	0.0935	0	0.4084	0.215	0.4104	0.1372	0	0.025	0.5351	0.3412	0.1881	0.1782	0.3293	0.2088	0.2451	0.4223	0.4045	0.4515	0.497	0.4085	0.3611	0.2091	0.3551	0.5168	0.4204	0.2968	0.5075	0.5621	0.3883	0.1347	0.0663
0.4504	0.3604	0	0.1976	0.5237	0.4924	0.6064	0.4988	0.4532	0.5791	0.3871	0.4971	0.6489	0.5728	0.4132	0.4123	0.091	0.5774	1	0.09	0	0.377	0.3258	0.6105	0.2331	0	0.0688	0.6658	0.3507	0.2061	0.3012	0.4284	0.3073	0.2852	0.422	0.3979	0.4455	0.5575	0.4529	0.3589	0.2775	0.3974	0.6451	0.4735	0.3161	0.6018	0.5702	0.4241	0.306	0.1453
0.042	0.0514	0	0.2906	0.0354	0.0331	0.1187	0.0147	0.0118	0.011	0.1821	0.0265	0.0214	0.0537	0.1544	0.1995	0.0476	0.0935	0.09	1	0	0	0.077	0.0191	0.0476	0	0.2692	0.0165	0.0242	0.0357	0	0	0.0476	0	0.0176	0.2152	0.016	0.0118	0.2374	0.0257	0.0924	0.0462	0.0068	0.3007	0.066	0.0332	0.158	0.0196	0	0
0	0	0	0	0	0	0	0	0	0	0	0	0	0	0	0	0	0	0	0	1	0	0	0	0	0	0	0	0	0	0	0	0	0	0	0	0	0	0	0	0	0	0	0	0	0	0	0	0	0
0.3564	0.4067	0	0.3957	0.2492	0.4578	0.4124	0.4653	0.3807	0.5254	0.375	0.3046	0.2544	0.4225	0.2836	0.191	0.2762	0.4084	0.377	0	0	1	0.205	0.3432	0.2968	0	0.0435	0.4683	0.3797	0.3843	0.5773	0.7319	0.4616	0.4832	0.4005	0.3129	0.3869	0.4973	0.333	0.5907	0.3005	0.4982	0.481	0.3659	0.1488	0.4192	0.6172	0.5101	0.0471	0.5035
0.5891	0.4727	0	0.1299	0.5023	0.4904	0.4719	0.4365	0.2481	0.3618	0.2828	0.2892	0.3532	0.3825	0.362	0.4555	0.3433	0.215	0.3258	0.077	0	0.205	1	0.3863	0.6113	0	0.0256	0.4523	0.498	0.3664	0.1954	0.3986	0.4171	0.2506	0.3503	0.3138	0.4357	0.3912	0.5998	0.2217	0.6949	0.5431	0.394	0.4452	0.5914	0.308	0.2108	0.5073	0.1106	0.3705
0.6372	0.4205	0	0.2111	0.5062	0.5469	0.5468	0.503	0.6368	0.7654	0.4366	0.2914	0.5475	0.479	0.4799	0.4139	0.1997	0.4104	0.6105	0.0191	0	0.3432	0.3863	1	0.3894	0	0.0464	0.6329	0.3318	0.3614	0.3214	0.4477	0.5084	0.1831	0.4927	0.3348	0.4757	0.5405	0.4543	0.3923	0.2881	0.4003	0.5847	0.4715	0.4401	0.3725	0.5623	0.3785	0.1598	0.1732
0.4119	0.4369	0	0.1007	0.2239	0.2975	0.376	0.3081	0.3257	0.3552	0.2334	0.0986	0.2653	0.2953	0.3219	0.4038	0.337	0.1372	0.2331	0.0476	0	0.2968	0.6113	0.3894	1	0	0.0256	0.3782	0.4102	0.366	0.411	0.3081	0.7239	0.2244	0.2938	0.2848	0.2305	0.3654	0.4837	0.5065	0.5033	0.3226	0.2721	0.4154	0.346	0.2098	0.2314	0.202	0.0257	0.5486
0	0	0	0	0	0	0	0	0	0	0	0	0	0	0	0	0	0	0	0	0	0	0	0	0	1	0	0	0	0	0	0	0	0	0	0	0	0	0	0	0	0	0	0	0	0	0	0	0	0
0.0591	0.0624	0	0.0654	0.0479	0.044	0.0313	0.0146	0.0395	0.0388	0.0535	0.0185	0.0334	0.0457	0.0989	0.1013	0.0256	0.025	0.0688	0.2692	0	0.0435	0.0256	0.0464	0.0256	0	1	0.028	0.0102	0.0236	0.068	0.0599	0.0937	0	0.0212	0.0218	0.0134	0.0117	0.0181	0.051	0.0308	0.0867	0.0281	0.2284	0.0302	0.0166	0.0571	0.011	0.0066	0
0.5529	0.3975	0	0.2271	0.6164	0.6982	0.6683	0.4982	0.377	0.5887	0.4257	0.4906	0.6223	0.6103	0.4471	0.4103	0.2275	0.5351	0.6658	0.0165	0	0.4683	0.4523	0.6329	0.3782	0	0.028	1	0.4932	0.3268	0.3017	0.5525	0.3749	0.2033	0.4355	0.4257	0.4869	0.5801	0.4426	0.3828	0.2977	0.4164	0.9442	0.361	0.3807	0.5921	0.5865	0.5702	0.2356	0.3008
0.4262	0.3702	0	0.1186	0.2829	0.4947	0.4522	0.4049	0.3871	0.4464	0.2238	0.4196	0.2767	0.5273	0.3595	0.4008	0.1257	0.3412	0.3507	0.0242	0	0.3797	0.498	0.3318	0.4102	0	0.0102	0.4932	1	0.2845	0.233	0.5013	0.2266	0.2597	0.3586	0.2219	0.4311	0.5095	0.4301	0.2488	0.2841	0.502	0.5005	0.2556	0.3145	0.4827	0.3362	0.5104	0.0391	0.3982
0.3203	0.3298	0	0.1487	0.2357	0.3086	0.3122	0.2412	0.2386	0.3668	0.2293	0.2424	0.3048	0.2748	0.4462	0.4055	0.4242	0.1881	0.2061	0.0357	0	0.3843	0.3664	0.3614	0.366	0	0.0236	0.3268	0.2845	1	0.4328	0.2787	0.3383	0.2791	0.5179	0.2641	0.4229	0.3712	0.48	0.2963	0.4945	0.4885	0.264	0.3795	0.4484	0.2613	0.2811	0.4112	0.037	0.1479
0.3019	0.3474	0	0.3622	0.2201	0.2996	0.3171	0.3694	0.3837	0.4132	0.2494	0.1097	0.1602	0.2477	0.2805	0.1374	0.341	0.1782	0.3012	0	0	0.5773	0.1954	0.3214	0.411	0	0.068	0.3017	0.233	0.4328	1	0.4986	0.5967	0.3695	0.2797	0.1531	0.3031	0.3627	0.3476	0.7117	0.3561	0.4437	0.3006	0.416	0.0952	0.1966	0.3738	0.2083	0.0316	0.4178
0.3368	0.4445	0	0.3009	0.3952	0.6169	0.5315	0.5507	0.403	0.5626	0.3462	0.313	0.3427	0.4114	0.2161	0.1878	0.2982	0.3293	0.4284	0	0	0.7319	0.3986	0.4477	0.3081	0	0.0599	0.5525	0.5013	0.2787	0.4986	1	0.5098	0.2537	0.3609	0.2617	0.3672	0.4927	0.3278	0.4604	0.2134	0.5091	0.5753	0.2853	0.232	0.4653	0.5808	0.7318	0.0863	0.4634
0.4155	0.6106	0	0.308	0.3328	0.4183	0.4665	0.3342	0.439	0.4531	0.3544	0.1026	0.2668	0.3106	0.3952	0.4003	0.3386	0.2088	0.3073	0.0476	0	0.4616	0.4171	0.5084	0.7239	0	0.0937	0.3749	0.2266	0.3383	0.5967	0.5098	1	0.2432	0.2856	0.2803	0.2267	0.3795	0.4915	0.655	0.5147	0.5367	0.2688	0.5583	0.3328	0.1913	0.3438	0.1927	0.0202	0.2728
0.2175	0.2217	0	0.2203	0.1721	0.183	0.3013	0.3568	0.1801	0.2479	0.0788	0.3005	0.1897	0.2608	0.2063	0.2676	0.0625	0.2451	0.2852	0	0	0.4832	0.2506	0.1831	0.2244	0	0	0.2033	0.2597	0.2791	0.3695	0.2537	0.2432	1	0.3558	0.1591	0.3953	0.3575	0.3948	0.4114	0.4476	0.4668	0.1948	0.3323	0.1603	0.2382	0.2338	0.2539	0.0774	0.1223
0.5234	0.3803	0	0.1985	0.3386	0.3373	0.4631	0.5809	0.4819	0.6571	0.21	0.2863	0.4203	0.291	0.4518	0.507	0.0535	0.4223	0.422	0.0176	0	0.4005	0.3503	0.4927	0.2938	0	0.0212	0.4355	0.3586	0.5179	0.2797	0.3609	0.2856	0.3558	1	0.1409	0.7272	0.6802	0.5065	0.403	0.4678	0.5078	0.4613	0.4458	0.6735	0.358	0.4728	0.6623	0.0449	0.1105
0.4515	0.2586	0	0.456	0.4872	0.4195	0.388	0.2605	0.2081	0.3054	0.547	0.3463	0.3813	0.3858	0.3407	0.3377	0.358	0.4045	0.3979	0.2152	0	0.3129	0.3138	0.3348	0.2848	0	0.0218	0.4257	0.2219	0.2641	0.1531	0.2617	0.2803	0.1591	0.1409	1	0.2471	0.2499	0.4433	0.2638	0.3304	0.2616	0.359	0.4817	0.2338	0.4243	0.5271	0.2506	0.3587	0.2058
0.5932	0.3744	0	0.2934	0.4378	0.3691	0.5281	0.7117	0.3926	0.6032	0.2467	0.3986	0.3616	0.3591	0.4909	0.4576	0.0908	0.4515	0.4455	0.016	0	0.3869	0.4357	0.4757	0.2305	0	0.0134	0.4869	0.4311	0.4229	0.3031	0.3672	0.2267	0.3953	0.7272	0.2471	1	0.8727	0.624	0.4257	0.4502	0.451	0.5431	0.3923	0.5332	0.449	0.4785	0.6309	0.0865	0.1532
0.5264	0.4733	0	0.2745	0.4087	0.4598	0.6224	0.7804	0.4976	0.6695	0.2414	0.376	0.4178	0.4329	0.4937	0.4663	0.1091	0.497	0.5575	0.0118	0	0.4973	0.3912	0.5405	0.3654	0	0.0117	0.5801	0.5095	0.3712	0.3627	0.4927	0.3795	0.3575	0.6802	0.2499	0.8727	1	0.6446	0.503	0.3949	0.4156	0.605	0.4462	0.4578	0.5115	0.5522	0.626	0.0727	0.2246
0.455	0.5797	0	0.3616	0.4415	0.4347	0.5681	0.5175	0.3638	0.4511	0.3538	0.3676	0.4386	0.3805	0.4467	0.4906	0.2399	0.4085	0.4529	0.2374	0	0.333	0.5998	0.4543	0.4837	0	0.0181	0.4426	0.4301	0.48	0.3476	0.3278	0.4915	0.3948	0.5065	0.4433	0.624	0.6446	1	0.4663	0.6855	0.5799	0.3489	0.7486	0.4356	0.3029	0.3926	0.4182	0.0825	0.1298
0.397	0.4525	0	0.475	0.2377	0.3052	0.3988	0.3967	0.4538	0.5373	0.2173	0.1548	0.226	0.3301	0.307	0.2416	0.0959	0.3611	0.3589	0.0257	0	0.5907	0.2217	0.3923	0.5065	0	0.051	0.3828	0.2488	0.2963	0.7117	0.4604	0.655	0.4114	0.403	0.2638	0.4257	0.503	0.4663	1	0.4196	0.472	0.3498	0.5129	0.1336	0.262	0.4496	0.2386	0.0365	0.2924
0.4889	0.5465	0	0.1967	0.358	0.3532	0.3706	0.4015	0.2521	0.3023	0.2363	0.1995	0.2624	0.2986	0.3819	0.4778	0.3387	0.2091	0.2775	0.0924	0	0.3005	0.6949	0.2881	0.5033	0	0.0308	0.2977	0.2841	0.4945	0.3561	0.2134	0.5147	0.4476	0.4678	0.3304	0.4502	0.3949	0.6855	0.4196	1	0.637	0.2222	0.6194	0.5683	0.2251	0.2388	0.3529	0.0406	0.1095
0.5482	0.5759	0	0.3481	0.4546	0.5205	0.503	0.4248	0.4355	0.4791	0.3362	0.3335	0.3389	0.475	0.4878	0.4881	0.2376	0.3551	0.3974	0.0462	0	0.4982	0.5431	0.4003	0.3226	0	0.0867	0.4164	0.502	0.4885	0.4437	0.5091	0.5367	0.4668	0.5078	0.2616	0.451	0.4156	0.5799	0.472	0.637	1	0.3638	0.6332	0.4452	0.3489	0.4068	0.4589	0.0373	0.1058
0.5529	0.3027	0	0.2382	0.5572	0.6446	0.6088	0.5588	0.3972	0.6133	0.4219	0.4972	0.5582	0.5548	0.3756	0.3037	0.1698	0.5168	0.6451	0.0068	0	0.481	0.394	0.5847	0.2721	0	0.0281	0.9442	0.5005	0.264	0.3006	0.5753	0.2688	0.1948	0.4613	0.359	0.5431	0.605	0.3489	0.3498	0.2222	0.3638	1	0.2712	0.3358	0.6011	0.6052	0.5959	0.2411	0.3178
0.5897	0.5768	0	0.4297	0.3818	0.3776	0.5001	0.4051	0.46	0.4802	0.3802	0.1948	0.3258	0.3767	0.4802	0.5007	0.2145	0.4204	0.4735	0.3007	0	0.3659	0.4452	0.4715	0.4154	0	0.2284	0.361	0.2556	0.3795	0.416	0.2853	0.5583	0.3323	0.4458	0.4817	0.3923	0.4462	0.7486	0.5129	0.6194	0.6332	0.2712	1	0.3759	0.2872	0.4804	0.2789	0.0307	0.0752
0.5415	0.4309	0	0.0897	0.4468	0.3566	0.4869	0.4181	0.3172	0.4266	0.2499	0.219	0.3604	0.3122	0.4718	0.6131	0.2783	0.2968	0.3161	0.066	0	0.1488	0.5914	0.4401	0.346	0	0.0302	0.3807	0.3145	0.4484	0.0952	0.232	0.3328	0.1603	0.6735	0.2338	0.5332	0.4578	0.4356	0.1336	0.5683	0.4452	0.3358	0.3759	1	0.2809	0.2359	0.6131	0.0413	0.1164
0.3878	0.2627	0	0.1599	0.374	0.4574	0.5529	0.4501	0.3292	0.4796	0.3696	0.4593	0.4279	0.5462	0.3261	0.3304	0.1669	0.5075	0.6018	0.0332	0	0.4192	0.308	0.3725	0.2099	0	0.0166	0.5921	0.4827	0.2613	0.1966	0.4653	0.1913	0.2382	0.358	0.4243	0.449	0.5115	0.3029	0.262	0.2251	0.3489	0.6011	0.2872	0.2809	1	0.5711	0.5131	0.2332	0.2543
0.5685	0.3317	0	0.3918	0.4336	0.5368	0.5093	0.5349	0.4641	0.645	0.4894	0.3571	0.4425	0.4809	0.3865	0.2812	0.1834	0.5621	0.5702	0.158	0	0.6172	0.2108	0.5623	0.2314	0	0.0571	0.5865	0.3362	0.2811	0.3738	0.5808	0.3438	0.2338	0.4728	0.5271	0.4785	0.5522	0.3926	0.4496	0.2388	0.4068	0.6052	0.4804	0.2359	0.5711	1	0.4981	0.0733	0.2613
0.4296	0.4201	0	0.1589	0.4621	0.5272	0.5801	0.6205	0.2956	0.5288	0.2517	0.374	0.3981	0.4033	0.3331	0.4375	0.2637	0.3883	0.4241	0.0196	0	0.5101	0.5073	0.3785	0.202	0	0.011	0.5702	0.5104	0.4112	0.2083	0.7318	0.1927	0.2539	0.6623	0.2506	0.6309	0.626	0.4182	0.2386	0.3529	0.4589	0.5959	0.2789	0.6131	0.5131	0.4981	1	0.0938	0.3345
0.0583	0.0237	0	0.2706	0.3408	0.2193	0.1457	0.0768	0.0212	0.0596	0.3113	0.2395	0.2945	0.1298	0.0238	0.0315	0.0071	0.1347	0.306	0	0	0.0471	0.1106	0.1598	0.0257	0	0.0066	0.2356	0.0391	0.037	0.0316	0.0863	0.0202	0.0774	0.0449	0.3587	0.0865	0.0727	0.0825	0.0365	0.0406	0.0373	0.2411	0.0307	0.0413	0.2332	0.0733	0.0938	1	0.0221
0.2323	0.1204	0	0.0716	0.0984	0.1915	0.2218	0.3456	0.2368	0.2529	0.3119	0.0933	0.0924	0.2228	0.1092	0.1194	0.3762	0.0663	0.1453	0	0	0.5035	0.3705	0.1732	0.5486	0	0	0.3008	0.3982	0.1479	0.4178	0.4634	0.2728	0.1223	0.1105	0.2058	0.1532	0.2246	0.1298	0.2924	0.1095	0.1058	0.3178	0.0752	0.1164	0.2543	0.2613	0.3345	0.0221	1
0.5684	0.5317	0	0.2575	0.5505	0.6245	0.5317	0.5044	0.3295	0.4349	0.4296	0.3225	0.3714	0.4339	0.395	0.4025	0.415	0.2672	0.3743	0.0514	0	0.3853	0.6867	0.5379	0.3376	0	0.0624	0.5494	0.4593	0.2956	0.3365	0.6069	0.4896	0.2203	0.3033	0.378	0.4184	0.387	0.5485	0.3351	0.5241	0.5881	0.503	0.4812	0.4723	0.3317	0.3489	0.5741	0.0924	0.2921
0.5853	0.4785	0	0.2108	0.5528	0.4672	0.5941	0.6495	0.3032	0.4801	0.273	0.2953	0.482	0.4152	0.5121	0.6267	0.2648	0.3114	0.4847	0.0514	0	0.3416	0.6703	0.4893	0.4306	0	0.0233	0.5154	0.3646	0.582	0.3453	0.3786	0.4264	0.4095	0.6818	0.3371	0.7251	0.6833	0.7427	0.3988	0.7181	0.5991	0.463	0.6041	0.7456	0.3707	0.386	0.6737	0.0995	0.1591
0.2043	0.3173	0	0.1995	0.1314	0.1277	0.3359	0.3011	0.2099	0.2701	0.0624	0.144	0.2305	0.1897	0.2106	0.2844	0.0293	0.1771	0.2656	0	0	0.3049	0.2218	0.2311	0.3974	0	0	0.205	0.1663	0.3107	0.3903	0.1879	0.3899	0.5849	0.4326	0.1458	0.3709	0.3863	0.4867	0.5275	0.4825	0.3566	0.1551	0.4128	0.1243	0.1662	0.2242	0.2053	0.0424	0.0761
0.2043	0.3173	0	0.1995	0.1314	0.1277	0.3359	0.3011	0.2099	0.2701	0.0624	0.144	0.2305	0.1897	0.2106	0.2844	0.0293	0.1771	0.2656	0	0	0.3049	0.2218	0.2311	0.3974	0	0	0.205	0.1663	0.3107	0.3903	0.1879	0.3899	0.5849	0.4326	0.1458	0.3709	0.3863	0.4867	0.5275	0.4825	0.3566	0.1551	0.4128	0.1243	0.1662	0.2242	0.2053	0.0424	0.0761
0.4697	0.2136	0	0.3567	0.5678	0.5778	0.4812	0.3909	0.2989	0.4687	0.3273	0.5463	0.5127	0.4453	0.2386	0.1617	0.0767	0.4244	0.5617	0	0	0.4447	0.3897	0.4461	0.266	0	0.0333	0.7484	0.3545	0.17	0.313	0.4614	0.2831	0.3056	0.2273	0.4774	0.3918	0.422	0.3229	0.3645	0.1773	0.2989	0.7692	0.2373	0.1638	0.4431	0.4682	0.3298	0.3687	0.2602
0.411	0.2969	0	0.1545	0.4602	0.4547	0.508	0.5967	0.2824	0.5131	0.2358	0.4416	0.3851	0.4088	0.321	0.4213	0.2389	0.3972	0.3771	0.0196	0	0.5281	0.484	0.3629	0.183	0	0.011	0.5214	0.4197	0.403	0.1895	0.6005	0.1736	0.4319	0.6428	0.2462	0.6052	0.5374	0.3999	0.2186	0.3342	0.4443	0.5439	0.2658	0.5887	0.448	0.4203	0.878	0.1112	0.3097
0.3308	0.4925	0	0.3993	0.2538	0.3359	0.3642	0.326	0.2636	0.3166	0.204	0.2311	0.1863	0.287	0.2105	0.1614	0.08	0.3365	0.331	0	0	0.7027	0.1996	0.2685	0.2131	0	0.068	0.2912	0.2389	0.2431	0.5518	0.5292	0.4398	0.6643	0.3149	0.1623	0.3504	0.4115	0.3529	0.5579	0.3645	0.4537	0.2893	0.4221	0.1396	0.2205	0.4011	0.3609	0.0635	0.1379
0.6258	0.1993	0	0.286	0.2396	0.1671	0.3647	0.5045	0.3881	0.5577	0.1914	0.1902	0.261	0.3088	0.3541	0.3049	0.0725	0.3372	0.3652	0	0	0.3604	0.1777	0.468	0.1925	0	0.0185	0.2799	0.1965	0.2893	0.2922	0.2144	0.1878	0.4123	0.5804	0.3369	0.6215	0.5428	0.3472	0.4175	0.3415	0.332	0.3351	0.4276	0.2981	0.3053	0.5329	0.3421	0.0321	0.0925
0.5855	0.438	0	0.3908	0.5052	0.5245	0.875	0.5186	0.445	0.6269	0.4923	0.3989	0.4806	0.5688	0.5063	0.4755	0.2566	0.5093	0.5709	0.1345	0	0.4772	0.417	0.5855	0.3398	0	0.0355	0.6157	0.4123	0.3335	0.3414	0.5522	0.442	0.2913	0.3816	0.5313	0.5299	0.5945	0.4881	0.4178	0.3173	0.4645	0.5848	0.5099	0.4502	0.6088	0.6253	0.5469	0.1352	0.2402
0.4326	0.3338	0	0.4255	0.3886	0.5369	0.4616	0.4678	0.488	0.637	0.2468	0.3303	0.3482	0.4118	0.2779	0.193	0.1256	0.3253	0.4058	0	0	0.6488	0.3966	0.4532	0.3016	0	0.0643	0.5085	0.4997	0.3573	0.5299	0.7562	0.5074	0.3141	0.4026	0.2507	0.467	0.5031	0.3873	0.5883	0.2776	0.6577	0.5254	0.3483	0.2196	0.4067	0.5185	0.502	0.0888	0.2909
0	0	0	0	0	0	0	0	0	0	0	0	0	0	0	0	0	0	0	0	0	0	0	0	0	0	0	0	0	0	0	0	0	0	0	0	0	0	0	0	0	0	0	0	0	0	0	0	0	0
0	0	0	0	0	0	0	0	0	0	0	0	0	0	0	0	0	0	0	0	0	0	0	0	0	0	0	0	0	0	0	0	0	0	0	0	0	0	0	0	0	0	0	0	0	0	0	0	0	0
0	0	0	0	0	0	0	0	0	0	0	0	0	0	0	0	0	0	0	0	0	0	0	0	0	0	0	0	0	0	0	0	0	0	0	0	0	0	0	0	0	0	0	0	0	0	0	0	0	0
0	0	0	0	0	0	0	0	0	0	0	0	0	0	0	0	0	0	0	0	0	0	0	0	0	0	0	0	0	0	0	0	0	0	0	0	0	0	0	0	0	0	0	0	0	0	0	0	0	0
0.6355	0.3638	0	0.2811	0.4548	0.4754	0.4568	0.4801	0.5071	0.6475	0.308	0.3625	0.4773	0.445	0.4132	0.3337	0.0673	0.5048	0.5388	0.0213	0	0.3487	0.3754	0.6485	0.3448	0	0.0468	0.6344	0.4203	0.1721	0.3184	0.3427	0.3265	0.1952	0.5528	0.2516	0.5207	0.5485	0.3765	0.5315	0.277	0.37	0.6401	0.3689	0.3959	0.3703	0.5268	0.3871	0.1035	0.2498
0	0	0	0	0	0	0	0	0	0	0	0	0	0	0	0	0	0	0	0	0	0	0	0	0	0	0	0	0	0	0	0	0	0	0	0	0	0	0	0	0	0	0	0	0	0	0	0	0	0
0	0	0	0	0	0	0	0	0	0	0	0	0	0	0	0	0	0	0	0	0	0	0	0	0	0	0	0	0	0	0	0	0	0	0	0	0	0	0	0	0	0	0	0	0	0	0	0	0	0
0.5202	0.4189	0	0.236	0.4238	0.5426	0.4616	0.3899	0.3752	0.484	0.2153	0.5267	0.3613	0.508	0.3054	0.3161	0.0916	0.6123	0.4947	0.0226	0	0.4978	0.3928	0.3502	0.1803	0	0.0381	0.4626	0.5706	0.2094	0.2288	0.512	0.2302	0.4271	0.3675	0.3069	0.395	0.4209	0.2909	0.3572	0.2645	0.5414	0.4723	0.4054	0.2926	0.571	0.5092	0.5113	0.0692	0.1876
0.4173	0.4427	0	0.1274	0.2284	0.2401	0.334	0.2946	0.3347	0.3506	0.3231	0.0939	0.2572	0.3007	0.3269	0.3828	0.4697	0.2362	0.2654	0.0408	0	0.3193	0.3377	0.4252	0.5228	0	0.3077	0.3004	0.1436	0.3053	0.238	0.3235	0.5559	0.189	0.2513	0.4998	0.1905	0.268	0.4321	0.3562	0.4307	0.3427	0.1929	0.5489	0.2836	0.2581	0.3501	0.2737	0.0177	0.2734
0.093	0.1358	0	0.1265	0.1057	0.1339	0.152	0.234	0.1208	0.1366	0.1805	0.1615	0.0655	0.1801	0.0622	0.0529	0.2857	0.1477	0.0961	0	0	0.4379	0.1067	0.0971	0.0994	0	0.4	0.1618	0.1016	0.0268	0.1525	0.3691	0.1498	0.4062	0.0583	0.2043	0.0984	0.1159	0.0799	0.1443	0.0618	0.1256	0.1712	0.0725	0.0631	0.1518	0.1897	0.29	0.0454	0.3334
0.5575	0.2994	0	0.2624	0.5552	0.5385	0.6636	0.5837	0.3935	0.5901	0.3802	0.5235	0.5319	0.537	0.4033	0.3781	0.175	0.4435	0.6386	0.0084	0	0.4407	0.461	0.5207	0.3248	0	0.0291	0.8654	0.488	0.2425	0.359	0.5518	0.3222	0.2815	0.4159	0.4036	0.5697	0.5953	0.3944	0.4115	0.2678	0.4082	0.8902	0.3059	0.384	0.5846	0.5377	0.5743	0.2283	0.3786
0.3482	0.2415	0	0.315	0.3868	0.3523	0.4834	0.5025	0.2267	0.4082	0.316	0.4491	0.4455	0.3685	0.2669	0.272	0.3026	0.2932	0.4405	0	0	0.4615	0.4353	0.3295	0.2394	0	0.0083	0.5002	0.3534	0.2409	0.313	0.5587	0.2411	0.4978	0.2999	0.4583	0.5123	0.4568	0.4049	0.4161	0.318	0.4179	0.506	0.2487	0.2316	0.4746	0.4155	0.5339	0.2441	0.379
0.4227	0.3076	0	0.1474	0.3238	0.3392	0.3103	0.4444	0.2905	0.399	0.2546	0.3448	0.3287	0.2679	0.2823	0.1518	0.0732	0.189	0.2941	0	0	0.1998	0.3418	0.4296	0.1372	0	0.0171	0.3555	0.3039	0.1995	0.1688	0.3621	0.1411	0.1906	0.3527	0.1618	0.4996	0.4434	0.3483	0.1889	0.1653	0.2377	0.4139	0.1592	0.1917	0.2359	0.3181	0.362	0.129	0.1433
0	0	0	0	0	0	0	0	0	0	0	0	0	0	0	0	0	0	0	0	0	0	0	0	0	0	0	0	0	0	0	0	0	0	0	0	0	0	0	0	0	0	0	0	0	0	0	0	0	0
0.7015	0.3566	0	0.251	0.6126	0.5735	0.6503	0.4877	0.4104	0.6106	0.3951	0.4865	0.5742	0.5708	0.477	0.4383	0.181	0.4804	0.6455	0.0231	0	0.3548	0.5289	0.6153	0.3557	0	0.0365	0.8581	0.4196	0.3232	0.2985	0.45	0.3666	0.2037	0.4067	0.4933	0.5431	0.553	0.4493	0.3582	0.3446	0.4271	0.8355	0.4427	0.4592	0.5438	0.538	0.4983	0.2335	0.2561
0.555	0.4037	0	0.2658	0.4499	0.3627	0.4746	0.428	0.3629	0.4699	0.2207	0.2271	0.2329	0.2809	0.3699	0.4211	0.1278	0.3671	0.3428	0.0252	0	0.2656	0.3725	0.3746	0.1257	0	0.0664	0.3824	0.2873	0.2556	0.2923	0.3744	0.3077	0.1646	0.5551	0.126	0.5288	0.4544	0.2841	0.2949	0.3216	0.4547	0.4055	0.4001	0.6493	0.3159	0.3339	0.6107	0.0422	0.1186
0.3436	0.3588	0	0.1354	0.415	0.4116	0.4149	0.4231	0.1819	0.2809	0.3733	0.3149	0.3389	0.3931	0.2909	0.3444	0.5348	0.2204	0.2777	0.0476	0	0.469	0.6126	0.3717	0.4282	0	0.0256	0.4045	0.279	0.3397	0.2056	0.5124	0.4261	0.4966	0.2086	0.436	0.311	0.2992	0.4573	0.2132	0.4629	0.4105	0.3428	0.3135	0.4024	0.2846	0.2815	0.4896	0.1265	0.3591
0.3031	0.2637	0	0.3041	0.3802	0.3572	0.2147	0.1274	0.1695	0.2036	0.2179	0.2746	0.2858	0.126	0.1314	0.0698	0.0258	0.2026	0.2709	0	0	0.2243	0.1885	0.2275	0.0357	0	0.1061	0.2545	0.0867	0.0475	0.3633	0.3624	0.3539	0.1118	0.0844	0.2181	0.1356	0.1132	0.1252	0.2862	0.0973	0.3298	0.2537	0.2184	0.095	0.173	0.3063	0.1657	0.0895	0.0429
0.4644	0.6091	0	0.5748	0.3961	0.3815	0.4066	0.1562	0.3631	0.3813	0.384	0.14	0.2286	0.2831	0.4346	0.3461	0.2179	0.369	0.2878	0.254	0	0.257	0.2864	0.4598	0.3804	0	0.0624	0.2628	0.1515	0.2964	0.2879	0.2278	0.5509	0.173	0.2244	0.5755	0.2221	0.2687	0.561	0.4015	0.3542	0.4233	0.1597	0.6942	0.2445	0.1706	0.3845	0.1236	0.2126	0.0327
0.5717	0.6356	0	0.4025	0.5975	0.5116	0.5126	0.3673	0.3208	0.417	0.3126	0.2599	0.282	0.3542	0.5692	0.5391	0.2325	0.3181	0.306	0.0514	0	0.251	0.4866	0.4287	0.2864	0	0.0656	0.4107	0.3252	0.412	0.2409	0.3206	0.435	0.1523	0.4811	0.3365	0.5133	0.4494	0.4335	0.2565	0.4572	0.5274	0.3696	0.4335	0.7077	0.2644	0.2856	0.527	0.2338	0.1
0.5516	0.7322	0	0.2554	0.483	0.6222	0.5741	0.4767	0.4517	0.601	0.332	0.3071	0.3322	0.4551	0.507	0.4474	0.2737	0.4161	0.3939	0.0462	0	0.5407	0.4745	0.5065	0.3816	0	0.0626	0.5049	0.5149	0.3768	0.3576	0.6664	0.5718	0.1588	0.4671	0.2382	0.4269	0.5244	0.4369	0.3674	0.4465	0.6208	0.4715	0.4315	0.5565	0.3735	0.5038	0.623	0.0232	0.226
0	0	0	0	0	0	0	0	0	0	0	0	0	0	0	0	0	0	0	0	0	0	0	0	0	0	0	0	0	0	0	0	0	0	0	0	0	0	0	0	0	0	0	0	0	0	0	0	0	0
0.0176	0.0221	0	0.339	0.0162	0.015	0.1099	0.016	0.0126	0.0118	0.1667	0.0098	0	0.0099	0.0088	0.0147	0	0.0974	0.0071	0.6667	0	0	0.0353	0	0	0	0	0.0065	0.0136	0	0	0	0	0	0.0196	0.2	0.0176	0.0126	0.232	0.0293	0.0441	0.0196	0.0071	0.2088	0.0294	0.0084	0.125	0.0221	0	0
0.4313	0.2746	0	0.0927	0.3806	0.2924	0.4081	0.4299	0.2569	0.3758	0.1063	0.2224	0.2259	0.2242	0.3067	0.4351	0.1821	0.3414	0.274	0.0294	0	0.1458	0.3831	0.2694	0.1356	0	0.0094	0.3432	0.292	0.2745	0.1009	0.2295	0.1182	0.1579	0.5866	0.1044	0.5474	0.4642	0.2838	0.142	0.3423	0.3	0.3643	0.2645	0.7018	0.2989	0.2376	0.6401	0.0446	0.1249
0.2408	0.2895	0	0.3439	0.2025	0.1955	0.182	0.1059	0.1775	0.1945	0.1825	0.0582	0.0599	0.1075	0.1306	0.0633	0.0273	0.1143	0.1294	0	0	0.2361	0.154	0.1824	0.0313	0	0.1361	0.1279	0.0731	0.0275	0.4146	0.3655	0.418	0.1124	0.0729	0.0244	0.1054	0.0911	0.0969	0.3119	0.095	0.3543	0.1353	0.2296	0.0861	0.0576	0.1577	0.1367	0.0126	0.04
0.2426	0.2617	0	0.0449	0.2739	0.252	0.1927	0.0661	0.1677	0.1806	0.2319	0.268	0.2971	0.1761	0.2217	0.2286	0.3951	0.1743	0.1778	0.0783	0	0.0506	0.3095	0.3197	0.2808	0	0.0419	0.2234	0.1016	0.429	0.0318	0.0645	0.2754	0.0305	0.0366	0.2934	0.1029	0.0906	0.2626	0.0567	0.3154	0.1959	0.1546	0.2149	0.2535	0.1196	0.1275	0.0687	0.0912	0.0327
0	0	0	0	0	0	0	0	0	0	0	0	0	0	0	0	0	0	0	0	0	0	0	0	0	0	0	0	0	0	0	0	0	0	0	0	0	0	0	0	0	0	0	0	0	0	0	0	0	0
0.5658	0.3234	0	0.2935	0.536	0.5562	0.5631	0.5366	0.5199	0.6755	0.3597	0.406	0.4295	0.4699	0.3564	0.3178	0.197	0.474	0.5993	0.0118	0	0.4699	0.4335	0.6171	0.2508	0	0.0336	0.6696	0.4182	0.2606	0.3651	0.5782	0.3373	0.2286	0.4593	0.4659	0.5421	0.554	0.4119	0.4281	0.29	0.3946	0.6654	0.4196	0.4355	0.5665	0.5725	0.5655	0.1914	0.3265
0.2	0	0	0	0.0103	0.0095	0.0067	0.0075	0.1458	0.1361	0.0069	0.0071	0.0061	0.0515	0.0158	0.0263	0.0364	0.1012	0.0819	0	0	0	0	0.1429	0	0	0	0.0049	0	0	0	0	0	0	0	0.2	0	0	0	0	0	0	0.0053	0.2	0	0.0983	0.125	0	0	0
0	0	0	0	0	0	0	0	0	0	0	0	0	0	0	0	0	0	0	0	0	0	0	0	0	0	0	0	0	0	0	0	0	0	0	0	0	0	0	0	0	0	0	0	0	0	0	0	0	0
0	0	0	0	0	0	0	0	0	0	0	0	0	0	0	0	0	0	0	0	0	0	0	0	0	0	0	0	0	0	0	0	0	0	0	0	0	0	0	0	0	0	0	0	0	0	0	0	0	0
0.0776	0.1273	0	0.0732	0.074	0.1085	0.1501	0.2766	0.1138	0.1321	0.1823	0.0667	0.0583	0.1229	0.0514	0.0618	0.4	0.0586	0.0803	0	0	0.2915	0.1493	0.0866	0.1392	0	0	0.1575	0.1173	0.0345	0.1455	0.4259	0.1418	0.1093	0.0713	0.2229	0.1181	0.1324	0.0977	0.137	0.0928	0.0945	0.1673	0.053	0.0842	0.1652	0.1921	0.3625	0.0123	0.4667
0.0326	0.0196	0	0.2906	0.0559	0.0521	0.119	0.0294	0.0298	0.0279	0.1674	0.0246	0.0133	0.0252	0.0084	0.0136	0.3333	0.1485	0.0155	0.5	0	0	0.0294	0.0121	0	0	0	0.0267	0.0126	0	0	0	0	0	0.0176	0.1983	0.016	0.0118	0.2088	0.0257	0.0353	0.0176	0.0288	0.2064	0.0252	0.0282	0.1283	0.0196	0	0
0.4434	0.2862	0	0.0904	0.2098	0.2009	0.1961	0.2526	0.2224	0.24	0.1982	0.0834	0.251	0.2261	0.2666	0.3169	0.3245	0.165	0.2506	0.0572	0	0.1468	0.3822	0.3355	0.3867	0	0.0362	0.1682	0.1369	0.3701	0.165	0.0914	0.3824	0.2074	0.1953	0.4179	0.1816	0.2407	0.4742	0.1979	0.5368	0.3615	0.0969	0.5922	0.3336	0.1681	0.2422	0.1136	0.0165	0.0307
0.261	0.0736	0	0.0701	0.2039	0.2157	0.1558	0.1678	0.0658	0.1267	0.0704	0.2498	0.2464	0.0958	0.0608	0.0809	0.0274	0.0932	0.1666	0	0	0.1021	0.2424	0.1819	0.1195	0	0	0.2323	0.1693	0.1168	0.1267	0.1781	0.0922	0.1628	0.1354	0.1455	0.1835	0.162	0.1784	0.1391	0.1557	0.1144	0.224	0.1021	0.1203	0.1395	0.1501	0.192	0.1172	0.1001
0	0	0	0	0	0	0	0	0	0	0	0	0	0	0	0	0	0	0	0	0	0	0	0	0	0	0	0	0	0	0	0	0	0	0	0	0	0	0	0	0	0	0	0	0	0	0	0	0	0
0	0	0	0	0	0	0	0	0	0	0	0	0	0	0	0	0	0	0	0	0	0	0	0	0	0	0	0	0	0	0	0	0	0	0	0	0	0	0	0	0	0	0	0	0	0	0	0	0	0
0	0	0	0	0	0	0	0	0	0	0	0	0	0	0	0	0	0	0	0	0	0	0	0	0	0	0	0	0	0	0	0	0	0	0	0	0	0	0	0	0	0	0	0	0	0	0	0	0	0
0	0	0	0	0	0	0	0	0	0	0	0	0	0	0	0	0	0	0	0	0	0	0	0	0	0	0	0	0	0	0	0	0	0	0	0	0	0	0	0	0	0	0	0	0	0	0	0	0	0
0	0	0	0	0	0	0	0	0	0	0	0	0	0	0	0	0	0	0	0	0	0	0	0	0	0	0	0	0	0	0	0	0	0	0	0	0	0	0	0	0	0	0	0	0	0	0	0	0	0
0	0	0	0	0	0	0	0	0	0	0	0	0	0	0	0	0	0	0	0	0	0	0	0	0	0	0	0	0	0	0	0	0	0	0	0	0	0	0	0	0	0	0	0	0	0	0	0	0	0
0	0	0	0	0	0	0	0	0	0	0	0	0	0	0	0	0	0	0	0	0	0	0	0	0	0	0	0	0	0	0	0	0	0	0	0	0	0	0	0	0	0	0	0	0	0	0	0	0	0
0	0	0	0	0	0	0	0	0	0	0	0	0	0	0	0	0	0	0	0	0	0	0	0	0	0	0	0	0	0	0	0	0	0	0	0	0	0	0	0	0	0	0	0	0	0	0	0	0	0
0	0	0	0	0	0	0	0	0	0	0	0	0	0	0	0	0	0	0	0	0	0	0	0	0	0	0	0	0	0	0	0	0	0	0	0	0	0	0	0	0	0	0	0	0	0	0	0	0	0
0	0	0	0	0	0	0	0	0	0	0	0	0	0	0	0	0	0	0	0	0	0	0	0	0	0	0	0	0	0	0	0	0	0	0	0	0	0	0	0	0	0	0	0	0	0	0	0	0	0
0.31	0.4075	0	0.3598	0.481	0.4709	0.429	0.4192	0.3267	0.425	0.1309	0.3694	0.3214	0.3071	0.2511	0.3382	0.0862	0.3501	0.3757	0.0252	0	0.3889	0.5016	0.3363	0.3256	0	0	0.3835	0.3173	0.1986	0.2401	0.3587	0.3363	0.557	0.4567	0.3046	0.443	0.4612	0.534	0.3731	0.4328	0.3935	0.342	0.3995	0.3288	0.2778	0.2226	0.4617	0.3589	0.1459
0	0	0	0	0	0	0	0	0	0	0	0	0	0	0	0	0	0	0	0	0	0	0	0	0	0	0	0	0	0	0	0	0	0	0	0	0	0	0	0	0	0	0	0	0	0	0	0	0	0
0	0	0	0	0	0	0	0	0	0	0	0	0	0	0	0	0	0	0	0	0	0	0	0	0	0	0	0	0	0	0	0	0	0	0	0	0	0	0	0	0	0	0	0	0	0	0	0	0	0
0.6302	0.2756	0	0.2839	0.2159	0.142	0.3124	0.4471	0.4495	0.6124	0.1996	0.1483	0.272	0.231	0.3716	0.3291	0.0753	0.3697	0.3332	0	0	0.3166	0.1322	0.5188	0.3018	0	0.0211	0.2915	0.1483	0.2262	0.2189	0.1871	0.301	0.257	0.6095	0.3348	0.5717	0.5554	0.3275	0.4507	0.2509	0.2294	0.3117	0.4307	0.3128	0.2676	0.5078	0.3239	0.0241	0.0808
0.5445	0.4533	0	0.222	0.3906	0.4591	0.5104	0.4458	0.4034	0.5472	0.469	0.2749	0.2862	0.4774	0.4814	0.507	0.2881	0.4475	0.4035	0.0282	0	0.593	0.3315	0.4181	0.1707	0	0.0453	0.4925	0.4964	0.3729	0.2909	0.5981	0.2858	0.1491	0.5264	0.3975	0.4465	0.4703	0.2812	0.2612	0.2758	0.4784	0.5036	0.4194	0.5117	0.4856	0.5516	0.7431	0.0323	0.3864
0.1126	0.2485	0	0.3677	0.0927	0.0908	0.2784	0.1665	0.1622	0.1967	0.1831	0.1776	0.163	0.1296	0.1376	0.1896	0.0131	0.2955	0.1694	0.4	0	0.3164	0.1109	0.1629	0.3	0	0	0.1483	0.082	0.1356	0.1679	0.0938	0.2957	0.5444	0.283	0.2492	0.1976	0.2607	0.4757	0.3508	0.2217	0.1504	0.0956	0.4202	0.0877	0.0846	0.2274	0.1263	0.0512	0.0311
0	0	0	0	0	0	0	0	0	0	0	0	0	0	0	0	0	0	0	0	0	0	0	0	0	0	0	0	0	0	0	0	0	0	0	0	0	0	0	0	0	0	0	0	0	0	0	0	0	0
0.3741	0.11	0	0.3233	0.2009	0.1157	0.2962	0.4079	0.2315	0.3338	0.3312	0.0949	0.1768	0.1153	0.2186	0.2033	0.0225	0.2413	0.1609	0.4	0	0.1046	0.0995	0.3066	0.0643	0	0.0295	0.157	0.1172	0.0713	0.0359	0.1514	0.0726	0.0669	0.4587	0.1904	0.4087	0.3503	0.2779	0.0909	0.0738	0.1287	0.2249	0.2464	0.3532	0.0911	0.3854	0.3291	0.0095	0.0344
0.5485	0.4398	0	0.1	0.3221	0.2461	0.4063	0.4095	0.3318	0.4378	0.2276	0.1466	0.3439	0.302	0.425	0.5394	0.2773	0.363	0.3451	0.0408	0	0.2077	0.3625	0.5188	0.505	0	0.026	0.2962	0.2024	0.339	0.1607	0.1809	0.5078	0.2954	0.451	0.3749	0.4402	0.4528	0.4467	0.3134	0.4568	0.4028	0.1949	0.5446	0.5073	0.2795	0.358	0.3166	0.0205	0.0538
0.312	0.2503	0	0.0211	0.2397	0.3256	0.1826	0.0909	0.024	0.0691	0.1987	0.1218	0.2118	0.1466	0.2132	0.2644	0.3421	0.033	0.0876	0.0714	0	0.035	0.4754	0.3109	0.3653	0	0.0384	0.2378	0.1746	0.2945	0.0397	0.1068	0.3584	0.0557	0.0527	0.2482	0.103	0.0844	0.2994	0.044	0.4524	0.2442	0.1696	0.2247	0.3359	0.06	0.0667	0.114	0.0358	0.0274
0	0	0	0	0	0	0	0	0	0	0	0	0	0	0	0	0	0	0	0	0	0	0	0	0	0	0	0	0	0	0	0	0	0	0	0	0	0	0	0	0	0	0	0	0	0	0	0	0	0
0.486	0.5187	0	0.2449	0.5455	0.5639	0.8778	0.537	0.4479	0.5947	0.4344	0.4	0.5354	0.5225	0.515	0.5322	0.3079	0.4735	0.5704	0.0179	0	0.4565	0.4346	0.5968	0.4334	0	0.0378	0.6496	0.423	0.3486	0.3586	0.5789	0.5413	0.3066	0.4445	0.3463	0.5076	0.6189	0.4681	0.4368	0.3289	0.4802	0.5843	0.4211	0.4705	0.5435	0.4889	0.5679	0.1428	0.2473
0.4956	0.53	0	0.253	0.4725	0.5488	0.8494	0.4754	0.5058	0.6044	0.4338	0.4001	0.4965	0.5308	0.4816	0.4964	0.2739	0.4327	0.578	0.0191	0	0.4639	0.4477	0.607	0.4481	0	0.0384	0.6031	0.4282	0.3548	0.3749	0.594	0.5623	0.3141	0.3725	0.4323	0.4443	0.5697	0.4803	0.4501	0.3393	0.492	0.5283	0.5058	0.3985	0.5987	0.4966	0.5109	0.1499	0.2572
0.4819	0.6128	0	0.2677	0.5361	0.6099	0.9042	0.5456	0.4942	0.5932	0.4431	0.4539	0.5056	0.5365	0.5235	0.5522	0.2787	0.4307	0.5688	0.0308	0	0.4725	0.545	0.545	0.4564	0	0.0384	0.6438	0.4944	0.3636	0.3853	0.6121	0.5727	0.3356	0.4513	0.3552	0.5196	0.6333	0.5633	0.4682	0.4428	0.5709	0.5713	0.496	0.4905	0.5895	0.4366	0.5937	0.1539	0.2673
0.4588	0.4198	0	0.2512	0.6958	0.682	0.5626	0.5	0.3048	0.5031	0.3077	0.4655	0.5478	0.4743	0.4579	0.5393	0.3289	0.5135	0.4591	0.033	0	0.4517	0.4922	0.4625	0.3633	0	0.0179	0.6514	0.3655	0.4483	0.1806	0.4643	0.3566	0.3521	0.5842	0.491	0.5149	0.5196	0.5168	0.2743	0.4098	0.4736	0.5775	0.4056	0.5493	0.4612	0.4571	0.676	0.2238	0.2198
0.5347	0.6383	0	0.2595	0.3941	0.5874	0.5544	0.4653	0.5498	0.6257	0.3763	0.332	0.327	0.5302	0.4258	0.4339	0.3645	0.5086	0.461	0.0385	0	0.7166	0.4299	0.5364	0.4645	0	0.0498	0.5334	0.4484	0.3546	0.3957	0.6829	0.6249	0.3692	0.4451	0.431	0.3213	0.4813	0.4834	0.4706	0.4579	0.6077	0.4583	0.6171	0.3841	0.4733	0.5808	0.5609	0.0391	0.3139
0.1789	0.2797	0	0.1107	0.1144	0.1714	0.2859	0.3069	0.3124	0.3509	0.0864	0.1046	0.1966	0.2187	0.1592	0.2222	0.0938	0.1419	0.2197	0	0	0.2851	0.2493	0.2687	0.6328	0	0	0.2623	0.3431	0.1822	0.4221	0.3054	0.481	0.2656	0.3206	0.1169	0.261	0.3685	0.3589	0.5257	0.2558	0.1729	0.2179	0.2779	0.1395	0.2162	0.2069	0.2283	0.029	0.3999
0.1564	0.2972	0	0.1135	0.1463	0.1646	0.2569	0.344	0.2538	0.2762	0.1886	0.1017	0.1827	0.1636	0.1486	0.203	0.4351	0.2476	0.2037	0	0	0.3442	0.1485	0.2306	0.3865	0	0	0.2638	0.1303	0.1509	0.2574	0.3577	0.3805	0.2519	0.297	0.2594	0.2222	0.3015	0.3288	0.3976	0.2409	0.175	0.2197	0.3035	0.1045	0.2074	0.2671	0.3285	0.0209	0.3516
0.2904	0.3686	0	0.1326	0.2724	0.3418	0.4122	0.3206	0.4375	0.4797	0.1952	0.485	0.4913	0.3195	0.2026	0.2253	0.0782	0.4244	0.4118	0	0	0.4172	0.2674	0.4261	0.3439	0	0.0092	0.3783	0.3967	0.3087	0.1703	0.3263	0.2442	0.38	0.4192	0.238	0.3091	0.4136	0.3289	0.2918	0.1873	0.1823	0.3415	0.2366	0.3021	0.3354	0.368	0.3415	0.0764	0.2054
0.3935	0.3423	0	0.1773	0.3456	0.4054	0.5499	0.429	0.3466	0.4912	0.391	0.4137	0.448	0.4675	0.3497	0.3624	0.1813	0.5071	0.5329	0.0384	0	0.4083	0.2843	0.4203	0.2107	0	0.0185	0.5773	0.3601	0.2973	0.167	0.4201	0.2034	0.2182	0.4417	0.3857	0.4722	0.5277	0.3578	0.2924	0.2591	0.3436	0.5383	0.3623	0.2979	0.8344	0.5542	0.5357	0.2255	0.1843
0.3085	0.3635	0	0.1038	0.363	0.4283	0.381	0.1911	0.1777	0.2995	0.3072	0.4292	0.4889	0.368	0.3832	0.4721	0.2277	0.3379	0.3213	0.0408	0	0.3732	0.3544	0.3312	0.408	0	0.0287	0.3764	0.3452	0.43	0.1286	0.2716	0.411	0.4327	0.374	0.4537	0.2144	0.2626	0.4295	0.2455	0.3922	0.4605	0.2625	0.3643	0.3002	0.273	0.3307	0.2796	0.0728	0.0386
0.4161	0.4565	0	0.0941	0.1966	0.1935	0.2751	0.1564	0.3885	0.4041	0.1939	0.1403	0.2413	0.232	0.3357	0.3899	0.2918	0.2355	0.2376	0.0476	0	0.1509	0.3361	0.5069	0.5179	0	0.0256	0.214	0.1363	0.522	0.1523	0.0934	0.5144	0.1809	0.2521	0.3985	0.2176	0.2729	0.4815	0.3106	0.4631	0.2972	0.0964	0.5476	0.2904	0.1753	0.2362	0.114	0.0144	0.0358
0.1353	0.2914	0	0.1129	0.0989	0.0991	0.3131	0.2059	0.1872	0.2315	0.0523	0.1215	0.1867	0.1474	0.1803	0.2608	0.0298	0.148	0.1985	0	0	0.1791	0.1732	0.1991	0.3605	0	0	0.1641	0.1446	0.1631	0.2137	0.1557	0.3632	0.4119	0.3267	0.0792	0.2398	0.2972	0.3584	0.3824	0.2891	0.2473	0.1106	0.297	0.1194	0.1251	0.1337	0.1741	0.0251	0.0538
0.1353	0.2914	0	0.1129	0.0989	0.0991	0.3131	0.2059	0.1872	0.2315	0.0523	0.1215	0.1867	0.1474	0.1803	0.2608	0.0298	0.148	0.1985	0	0	0.1791	0.1732	0.1991	0.3605	0	0	0.1641	0.1446	0.1631	0.2137	0.1557	0.3632	0.4119	0.3267	0.0792	0.2398	0.2972	0.3584	0.3824	0.2891	0.2473	0.1106	0.297	0.1194	0.1251	0.1337	0.1741	0.0251	0.0538
0.4265	0.2671	0	0.1051	0.2648	0.1671	0.3167	0.3212	0.3345	0.4475	0.1331	0.2577	0.4226	0.2146	0.2648	0.35	0.0618	0.3444	0.4275	0.0545	0	0.1956	0.1449	0.4505	0.3039	0	0.0336	0.2962	0.1313	0.1804	0.1752	0.1694	0.3043	0.2216	0.4699	0.2883	0.3538	0.3835	0.3087	0.3282	0.2227	0.2014	0.2511	0.4223	0.3227	0.2514	0.4048	0.3197	0.1024	0.0528
0.1334	0.2753	0	0.0988	0.0997	0.101	0.3044	0.2006	0.1845	0.2244	0.0557	0.1213	0.1836	0.147	0.1772	0.2502	0.0256	0.2002	0.196	0	0	0.175	0.1485	0.1937	0.3231	0	0	0.163	0.1436	0.145	0.1832	0.1529	0.3253	0.3433	0.3072	0.0726	0.2312	0.2871	0.3348	0.3508	0.2409	0.2248	0.1113	0.2805	0.1185	0.1555	0.1335	0.1697	0.0209	0.0461
0.1353	0.2914	0	0.1129	0.0989	0.0991	0.3131	0.2059	0.1872	0.2315	0.0523	0.1215	0.1867	0.1474	0.1803	0.2608	0.0298	0.148	0.1985	0	0	0.1791	0.1732	0.1991	0.3605	0	0	0.1641	0.1446	0.1631	0.2137	0.1557	0.3632	0.4119	0.3267	0.0792	0.2398	0.2972	0.3584	0.3824	0.2891	0.2473	0.1106	0.297	0.1194	0.1251	0.1337	0.1741	0.0251	0.0538
0.1263	0.2997	0	0.1168	0.0778	0.0767	0.2024	0.1888	0.1791	0.217	0.0469	0.0814	0.1785	0.0804	0.147	0.2138	0.0183	0.141	0.1695	0	0	0.1797	0.1377	0.1862	0.42	0	0	0.1524	0.0878	0.1743	0.235	0.1206	0.414	0.3165	0.3361	0.0783	0.2283	0.2917	0.3592	0.4217	0.3105	0.1741	0.0957	0.3042	0.1023	0.0885	0.1309	0.1468	0.0251	0.0436
0.2841	0.3022	0	0.1059	0.0763	0.0806	0.193	0.1684	0.4128	0.4279	0.0475	0.1446	0.1648	0.1388	0.1728	0.2059	0.0477	0.2445	0.2358	0	0	0.1635	0.0983	0.4136	0.3062	0	0	0.1524	0.113	0.3578	0.174	0.1038	0.3021	0.211	0.275	0.2448	0.2357	0.29	0.3435	0.3451	0.207	0.1424	0.1	0.4202	0.0767	0.1777	0.2366	0.1254	0.0168	0.0409
0.4055	0.3998	0	0.1168	0.2117	0.2056	0.2748	0.2918	0.2832	0.3072	0.4538	0.0872	0.2603	0.1805	0.415	0.3942	0.3459	0.1438	0.1829	0.0476	0	0.3064	0.3361	0.4006	0.5125	0	0.0356	0.2245	0.1179	0.4083	0.2314	0.1031	0.5087	0.1809	0.4416	0.2328	0.3301	0.3583	0.4435	0.2952	0.4631	0.3187	0.1694	0.4006	0.3379	0.0929	0.2372	0.1314	0.0144	0.2772
0.2098	0.3117	0	0.1604	0.1595	0.1744	0.3457	0.3242	0.272	0.3194	0.122	0.2006	0.2168	0.1848	0.2587	0.3372	0.0652	0.1987	0.272	0	0	0.2353	0.2231	0.2725	0.3431	0	0.014	0.281	0.2556	0.1933	0.241	0.2581	0.3716	0.5168	0.4019	0.1011	0.3426	0.3799	0.3784	0.3848	0.2977	0.3999	0.2472	0.3202	0.1781	0.2181	0.2001	0.2542	0.0344	0.1027
0	0	0	0	0	0	0	0	0	0	0	0	0	0	0	0	0	0	0	0	0	0	0	0	0	0	0	0	0	0	0	0	0	0	0	0	0	0	0	0	0	0	0	0	0	0	0	0	0	0
0.6128	0.5459	0	0.3214	0.4676	0.5208	0.5675	0.4417	0.4698	0.7089	0.309	0.3851	0.3685	0.527	0.572	0.49	0.1367	0.5228	0.4951	0.0242	0	0.4912	0.3954	0.5626	0.1767	0	0.0389	0.563	0.5332	0.4892	0.2769	0.5476	0.279	0.221	0.5399	0.4087	0.6231	0.619	0.4375	0.3717	0.3194	0.5001	0.5687	0.4495	0.471	0.513	0.5648	0.6812	0.0664	0.1384
0	0	0	0	0	0	0	0	0	0	0	0	0	0	0	0	0	0	0	0	0	0	0	0	0	0	0	0	0	0	0	0	0	0	0	0	0	0	0	0	0	0	0	0	0	0	0	0	0	0
0.3838	0.3722	0	0.0883	0.3193	0.4644	0.3748	0.3487	0.3549	0.373	0.2978	0.1041	0.1809	0.3626	0.247	0.2817	0.4903	0.3136	0.2901	0.0318	0	0.4107	0.3002	0.4129	0.403	0	0.0171	0.3933	0.2749	0.1868	0.2113	0.4969	0.4372	0.0959	0.1027	0.4876	0.149	0.3027	0.2426	0.2182	0.2732	0.2258	0.3463	0.3617	0.2674	0.3809	0.44	0.3703	0.0261	0.361
0.41	0.2474	0	0.278	0.2249	0.2163	0.2129	0.1498	0.1714	0.2143	0.1752	0.0934	0.1044	0.2041	0.1484	0.0998	0.0242	0.1154	0.1576	0	0	0.2305	0.4528	0.2046	0.3634	0	0.0816	0.2222	0.3438	0.1021	0.3519	0.3557	0.3212	0.1399	0.128	0.0379	0.1675	0.1401	0.1527	0.2904	0.1283	0.3253	0.234	0.2281	0.1411	0.1532	0.1653	0.192	0.032	0.3659
0	0	0	0	0	0	0	0	0	0	0	0	0	0	0	0	0	0	0	0	0	0	0	0	0	0	0	0	0	0	0	0	0	0	0	0	0	0	0	0	0	0	0	0	0	0	0	0	0	0
0.1147	0.1527	0	0.05	0.1129	0.1204	0.2751	0.2971	0.0983	0.1446	0.063	0.142	0.1133	0.1451	0.119	0.178	0.0427	0.1531	0.1341	0	0	0.1149	0.1754	0.1128	0.0965	0	0	0.1097	0.1767	0.0408	0.0618	0.2007	0.112	0.3187	0.1437	0.0371	0.293	0.2616	0.1352	0.0996	0.1202	0.2144	0.1085	0.0916	0.1559	0.1886	0.0984	0.2196	0.0189	0.0591
0.5396	0.2812	0	0.1015	0.3473	0.261	0.4164	0.4429	0.2407	0.3703	0.1065	0.2269	0.2335	0.2508	0.3162	0.4496	0.0592	0.2483	0.2678	0.0294	0	0.1585	0.6059	0.2637	0.3583	0	0.0094	0.3756	0.4452	0.2987	0.1215	0.2572	0.1272	0.1814	0.6068	0.0816	0.5705	0.4805	0.3089	0.1585	0.3658	0.3137	0.399	0.2483	0.726	0.3083	0.2266	0.6653	0.0527	0.3477
0.3243	0.2657	0	0.3033	0.2491	0.3394	0.2102	0.1388	0.1712	0.2104	0.1811	0.1472	0.1419	0.1238	0.1342	0.0744	0.0271	0.1259	0.1679	0	0	0.2297	0.2081	0.3163	0.0445	0	0.1021	0.2535	0.1837	0.0578	0.3733	0.3742	0.3584	0.1232	0.0933	0.0546	0.1493	0.1239	0.139	0.2945	0.1093	0.3355	0.2635	0.2251	0.1024	0.0823	0.1823	0.1791	0.0409	0.0506
0.543	0.3958	0	0.2905	0.4605	0.566	0.4563	0.6176	0.4386	0.5964	0.4175	0.3751	0.3463	0.3774	0.3263	0.2558	0.2367	0.328	0.3744	0.0196	0	0.4949	0.4961	0.4893	0.1543	0	0.0625	0.5164	0.4919	0.2751	0.3337	0.7214	0.3089	0.2303	0.5457	0.2321	0.5386	0.4831	0.4147	0.3327	0.3311	0.5716	0.5882	0.3655	0.3354	0.3876	0.5002	0.6872	0.0858	0.2925
0	0	0	0	0	0	0	0	0	0	0	0	0	0	0	0	0	0	0	0	0	0	0	0	0	0	0	0	0	0	0	0	0	0	0	0	0	0	0	0	0	0	0	0	0	0	0	0	0	0
0.5432	0.334	0	0.3553	0.6119	0.5234	0.6027	0.4973	0.3279	0.4946	0.2907	0.4156	0.4899	0.4364	0.3753	0.4006	0.1103	0.3499	0.5151	0.042	0	0.2804	0.5449	0.4216	0.2563	0	0.0507	0.5709	0.3973	0.2514	0.2676	0.4438	0.2547	0.2221	0.4741	0.2752	0.5503	0.499	0.3792	0.2815	0.2887	0.411	0.591	0.3317	0.501	0.3688	0.3501	0.5992	0.3026	0.2532
0.4313	0.4535	0	0.2896	0.4772	0.3993	0.39	0.1399	0.1743	0.2058	0.4482	0.3045	0.4084	0.2752	0.3202	0.2973	0.3129	0.2036	0.3234	0.0572	0	0.2328	0.4624	0.3609	0.3601	0	0.1182	0.3846	0.1453	0.3005	0.3466	0.3221	0.6161	0.1337	0.1141	0.367	0.149	0.1357	0.3221	0.2999	0.4555	0.5037	0.3154	0.4081	0.3582	0.2022	0.2633	0.1588	0.2487	0.0682
0.3625	0.2644	0	0.2274	0.4507	0.4354	0.2572	0.2289	0.2495	0.274	0.148	0.3782	0.3383	0.296	0.359	0.3692	0.1021	0.2923	0.397	0.1023	0	0.102	0.3167	0.2388	0.1055	0	0.0408	0.2872	0.199	0.0979	0.0653	0.1569	0.1194	0.1122	0.1986	0.4638	0.2209	0.2069	0.2581	0.0913	0.2806	0.2544	0.2668	0.3125	0.2643	0.3188	0.3001	0.259	0.2902	0.0583
0	0	0	0	0	0	0	0	0	0	0	0	0	0	0	0	0	0	0	0	0	0	0	0	0	0	0	0	0	0	0	0	0	0	0	0	0	0	0	0	0	0	0	0	0	0	0	0	0	0
0	0	0	0	0	0	0	0	0	0	0	0	0	0	0	0	0	0	0	0	0	0	0	0	0	0	0	0	0	0	0	0	0	0	0	0	0	0	0	0	0	0	0	0	0	0	0	0	0	0
0	0	0	0	0	0	0	0	0	0	0	0	0	0	0	0	0	0	0	0	0	0	0	0	0	0	0	0	0	0	0	0	0	0	0	0	0	0	0	0	0	0	0	0	0	0	0	0	0	0
0.4836	0.2103	0	0.3345	0.5711	0.4957	0.4227	0.3331	0.3603	0.4252	0.3604	0.4442	0.3595	0.3257	0.2936	0.2252	0.0602	0.3932	0.5021	0	0	0.2118	0.2201	0.4653	0.0591	0	0.0484	0.3995	0.2287	0.0745	0.2016	0.3315	0.2004	0.2805	0.2482	0.4877	0.3273	0.3014	0.1958	0.1984	0.1165	0.3736	0.428	0.306	0.1493	0.418	0.4882	0.2432	0.3574	0.0692
0.4736	0.4923	0	0.5477	0.5979	0.5142	0.593	0.4746	0.3413	0.4959	0.3206	0.3263	0.3097	0.3365	0.4325	0.3919	0.0785	0.4045	0.4002	0.2088	0	0.2929	0.4296	0.4227	0.1363	0	0.0465	0.4569	0.3458	0.2856	0.2792	0.4349	0.271	0.2122	0.5	0.3539	0.6054	0.5387	0.5269	0.3059	0.297	0.43	0.4747	0.4425	0.5327	0.3217	0.4123	0.6175	0.262	0.1366
0.4448	0.4374	0	0.4621	0.6819	0.5859	0.4973	0.3196	0.2355	0.3484	0.4585	0.3207	0.42	0.3751	0.3447	0.3301	0.2945	0.275	0.4091	0.0408	0	0.3104	0.5819	0.4457	0.3477	0	0.0826	0.462	0.2534	0.3141	0.3386	0.4911	0.5389	0.2223	0.2013	0.5344	0.3105	0.2963	0.4455	0.3213	0.4168	0.5291	0.4064	0.4075	0.3736	0.2803	0.2811	0.3553	0.5468	0.1326
0.3523	0.2262	0	0.2598	0.2032	0.1974	0.2591	0.1149	0.274	0.2886	0.1533	0.1828	0.0658	0.2494	0.1598	0.1216	0.0481	0.2784	0.2226	0	0	0.3424	0.1311	0.2843	0.0253	0	0.068	0.1305	0.1062	0.0257	0.2677	0.2837	0.2698	0.4568	0.069	0.1936	0.1121	0.0987	0.0959	0.2251	0.0789	0.328	0.1373	0.3437	0.0766	0.1728	0.2428	0.1248	0.0403	0.0333
0.5641	0.2929	0	0.2614	0.5609	0.524	0.6187	0.5578	0.3604	0.5675	0.3771	0.4925	0.5358	0.5244	0.3739	0.3392	0.1616	0.4324	0.6067	0.0088	0	0.4202	0.4645	0.5057	0.2813	0	0.0305	0.8552	0.4174	0.2451	0.3157	0.5336	0.2916	0.2184	0.4167	0.4013	0.5646	0.5724	0.3947	0.374	0.2617	0.3621	0.8801	0.3026	0.3835	0.5338	0.5239	0.5786	0.2374	0.3359
0.016	0.0196	0	0.5763	0.1634	0.1525	0.1044	0.0147	0.0118	0.011	0.1538	0.0202	0	0.0146	0.0084	0.0136	0	0.1048	0.0117	0.5	0	0.0188	0.0294	0	0	0	0	0.0118	0.0126	0	0	0	0	0.0414	0.0176	0.3636	0.016	0.0118	0.2088	0.0257	0.0353	0.0176	0.0127	0.1898	0.0252	0.008	0.1176	0.0196	0.4	0
0.1284	0.0972	0	0.1237	0.1616	0.1405	0.143	0.2635	0.1013	0.1332	0.1006	0.3215	0.3183	0.163	0.1082	0.119	0.0284	0.1888	0.31	0.0654	0	0.3201	0.1305	0.1285	0.1173	0	0.0401	0.1772	0.1136	0.1665	0.1763	0.1118	0.1124	0.554	0.2056	0.1527	0.1985	0.2534	0.3141	0.2068	0.2258	0.1919	0.1686	0.27	0.1046	0.1345	0.186	0.134	0.1491	0.0392
0.0589	0.0945	0	0.0466	0.0655	0.197	0.1919	0.2657	0.2353	0.2427	0.0602	0.0539	0.0481	0.1204	0.0397	0.0513	0.119	0.0421	0.1247	0	0	0.2725	0.1414	0.1776	0.3409	0	0	0.1635	0.1809	0.0226	0.3466	0.4092	0.4134	0.0937	0.0545	0.0738	0.1007	0.2129	0.0864	0.2678	0.079	0.0742	0.1751	0.0406	0.0682	0.1517	0.1777	0.1692	0.0079	0.3957
0.4892	0.5523	0	0.2642	0.5485	0.6248	0.8756	0.5498	0.4435	0.5482	0.4539	0.4628	0.4641	0.5395	0.4835	0.4995	0.2932	0.3926	0.5284	0.033	0	0.4598	0.5643	0.4963	0.3748	0	0.0411	0.6144	0.5063	0.3427	0.3632	0.633	0.4983	0.3087	0.3763	0.3565	0.5091	0.5846	0.4903	0.3858	0.423	0.5624	0.5781	0.4233	0.5085	0.5977	0.4254	0.6124	0.1608	0.2795
0.3309	0.3799	0	0.3892	0.5004	0.5818	0.7767	0.4971	0.393	0.5039	0.3605	0.4257	0.4035	0.4259	0.3137	0.3122	0.1679	0.3483	0.4914	0	0	0.4837	0.3582	0.4193	0.257	0	0.0325	0.5343	0.4352	0.2355	0.3757	0.6499	0.3865	0.321	0.309	0.3491	0.4518	0.54	0.3191	0.3883	0.1921	0.3997	0.5495	0.2535	0.3119	0.5606	0.4223	0.5545	0.3106	0.2867
0.4988	0.3753	0	0.2545	0.471	0.4937	0.8092	0.5627	0.4782	0.6351	0.3639	0.4172	0.4474	0.4842	0.3751	0.3865	0.1681	0.4451	0.5816	0	0	0.4648	0.3491	0.5591	0.2525	0	0.0342	0.5678	0.4293	0.2352	0.3572	0.6301	0.3738	0.2982	0.3914	0.3342	0.5207	0.5944	0.3138	0.377	0.1902	0.3912	0.5898	0.3447	0.3974	0.6137	0.5495	0.6152	0.1584	0.2737
0	0	0	0	0	0	0	0	0	0	0	0	0	0	0	0	0	0	0	0	0	0	0	0	0	0	0	0	0	0	0	0	0	0	0	0	0	0	0	0	0	0	0	0	0	0	0	0	0	0
0.2665	0.3132	0	0.1001	0.2249	0.2294	0.2446	0.3062	0.2191	0.2489	0.0737	0.1844	0.108	0.1551	0.1525	0.2262	0.069	0.1669	0.1711	0.0588	0	0.1268	0.4795	0.1139	0.0951	0	0	0.1767	0.249	0.0672	0.1123	0.2203	0.1288	0.1886	0.3063	0.0714	0.2999	0.2578	0.3091	0.147	0.5171	0.3417	0.1827	0.2614	0.3967	0.181	0.1062	0.3877	0.0321	0.1075
0.2269	0.2671	0	0.5853	0.1967	0.1906	0.2729	0.1044	0.1716	0.1878	0.3223	0.0598	0.0572	0.1114	0.1286	0.0652	0.0227	0.1996	0.1278	0.5	0	0.2146	0.143	0.1703	0.0261	0	0.1021	0.1265	0.0742	0.0241	0.3455	0.3198	0.3483	0.0899	0.0744	0.204	0.1038	0.0909	0.2872	0.2985	0.0936	0.3277	0.1335	0.3905	0.0864	0.059	0.266	0.1313	0.0101	0.0333
0.0552	0.0663	0	0.2801	0.0636	0.0596	0.1226	0.0136	0.011	0.0104	0.3031	0.1119	0.0225	0.1462	0.1531	0.2024	0.0695	0.1687	0.0229	0.4324	0	0.1667	0.0947	0.0304	0.0695	0	0.0144	0.0263	0.1451	0.054	0	0	0.0695	0.3333	0.016	0.3708	0.0147	0.011	0.2341	0.0228	0.1105	0.0603	0.0102	0.2176	0.0829	0.0119	0.1187	0.0176	0.0345	0
0.398	0.3018	0	0.0549	0.2064	0.2283	0.2331	0.2372	0.2246	0.2342	0.3194	0.0664	0.1434	0.2624	0.2393	0.2874	0.5974	0.1475	0.1619	0.0572	0	0.2429	0.3924	0.3258	0.3851	0	0.0308	0.2202	0.134	0.2491	0.104	0.3313	0.387	0.0729	0.0583	0.5393	0.0984	0.1159	0.2618	0.1066	0.3952	0.2591	0.1599	0.3839	0.3131	0.2458	0.2946	0.29	0.0082	0.3334
0	0	0	0	0	0	0	0	0	0	0	0	0	0	0	0	0	0	0	0	0	0	0	0	0	0	0	0	0	0	0	0	0	0	0	0	0	0	0	0	0	0	0	0	0	0	0	0	0	0
0.4121	0.2994	0	0.2755	0.2289	0.2522	0.2744	0.3256	0.2261	0.3448	0.1926	0.2583	0.2372	0.2475	0.2294	0.2224	0.0702	0.2369	0.3326	0.0294	0	0.2886	0.3717	0.2999	0.1313	0	0	0.3517	0.258	0.1789	0.2112	0.2177	0.1486	0.2694	0.3429	0.213	0.4422	0.389	0.3838	0.3617	0.4567	0.3506	0.3598	0.3162	0.2942	0.318	0.2341	0.3415	0.2844	0.0998
0.5173	0.3175	0	0.2479	0.4463	0.5687	0.5209	0.6742	0.4545	0.6642	0.1691	0.4146	0.4172	0.4491	0.3385	0.3617	0.12	0.4301	0.4551	0.016	0	0.5018	0.4753	0.5041	0.2748	0	0.0122	0.583	0.5992	0.3219	0.3106	0.5865	0.3071	0.3219	0.5552	0.2379	0.6837	0.6795	0.4543	0.4126	0.3693	0.5732	0.6052	0.3197	0.4387	0.4958	0.497	0.6537	0.0826	0.2498
0.4941	0.551	0	0.2653	0.4189	0.3379	0.5376	0.3777	0.2463	0.3511	0.3361	0.2568	0.2818	0.3094	0.5225	0.5636	0.2489	0.3223	0.2541	0.2968	0	0.1324	0.5153	0.3553	0.3104	0	0.0228	0.3645	0.3364	0.4409	0.0827	0.1953	0.2962	0.1228	0.5091	0.3485	0.5342	0.4625	0.5804	0.1345	0.4982	0.4063	0.319	0.4683	0.764	0.2698	0.3034	0.5522	0.0347	0.1032
0	0	0	0	0	0	0	0	0	0	0	0	0	0	0	0	0	0	0	0	0	0	0	0	0	0	0	0	0	0	0	0	0	0	0	0	0	0	0	0	0	0	0	0	0	0	0	0	0	0
0.4199	0.234	0	0.4036	0.3904	0.3828	0.4165	0.3437	0.2994	0.3537	0.4643	0.3582	0.3278	0.2278	0.3567	0.1939	0.2292	0.3168	0.3613	0.2222	0	0.2646	0.2094	0.4195	0.0632	0	0.0628	0.3531	0.2177	0.2276	0.4191	0.3414	0.2397	0.2449	0.2741	0.3043	0.3394	0.3074	0.3102	0.2437	0.1185	0.3881	0.3907	0.3373	0.1574	0.2682	0.4971	0.2393	0.0877	0.1339
0	0	0	0	0	0	0	0	0	0	0	0	0	0	0	0	0	0	0	0	0	0	0	0	0	0	0	0	0	0	0	0	0	0	0	0	0	0	0	0	0	0	0	0	0	0	0	0	0	0
0.0375	0	0	0	0.0624	0.0579	0.0151	0.0173	0.0336	0.0314	0.0159	0.0159	0.0136	0.015	0	0	0.2	0.108	0.019	0	0	0	0	0.0268	0	0	0	0.03	0	0	0	0	0	0	0	0.0375	0	0	0	0	0	0	0.0324	0.0375	0	0.0249	0.0234	0	0	0
0.0176	0.0221	0	0.339	0.0162	0.015	0.1099	0.016	0.0126	0.0118	0.1667	0.0098	0	0.0099	0.0088	0.0147	0	0.0974	0.0071	0.6667	0	0	0.0353	0	0	0	0	0.0065	0.0136	0	0	0	0	0	0.0196	0.2	0.0176	0.0126	0.232	0.0293	0.0441	0.0196	0.0071	0.2088	0.0294	0.0084	0.125	0.0221	0	0
0	0	0	0	0	0	0	0	0	0	0	0	0	0	0	0	0	0	0	0	0	0	0	0	0	0	0	0	0	0	0	0	0	0	0	0	0	0	0	0	0	0	0	0	0	0	0	0	0	0
0.2313	0.3018	0	0.0808	0.2146	0.236	0.2311	0.234	0.0995	0.1166	0.3165	0.1643	0.1416	0.2623	0.2249	0.2648	0.5714	0.1329	0.0953	0.0572	0	0.4096	0.3924	0.2008	0.3851	0	0.0308	0.219	0.134	0.2491	0.104	0.3313	0.387	0.4062	0.0583	0.3899	0.0984	0.1159	0.2618	0.1066	0.3952	0.2591	0.1586	0.2172	0.3131	0.1589	0.1835	0.29	0.0427	0.3334
0.2345	0.1284	0	0.1021	0.1953	0.3182	0.2773	0.2541	0.1221	0.1997	0.074	0.353	0.1962	0.2182	0.1488	0.2016	0.0571	0.1995	0.2122	0	0	0.2835	0.253	0.2781	0.0823	0	0	0.2677	0.3803	0.0822	0.1065	0.2631	0.107	0.6099	0.1533	0.1007	0.2439	0.228	0.1988	0.1205	0.1359	0.2836	0.274	0.1147	0.1533	0.1996	0.1296	0.2624	0.0758	0.0922
0.3371	0.3945	0	0.4478	0.4048	0.3892	0.2441	0.0827	0.1707	0.1863	0.2813	0.2027	0.1315	0.2568	0.292	0.2329	0.2449	0.1928	0.1363	0.0408	0	0.3417	0.3078	0.2805	0.2458	0	0.0803	0.193	0.1042	0.2435	0.2365	0.2407	0.4611	0.3242	0.0505	0.3502	0.1093	0.0978	0.2463	0.2272	0.2975	0.3991	0.1349	0.3123	0.2517	0.0686	0.1536	0.0979	0.2779	0.0302
0.3333	0.2	0	0.0259	0.156	0.1463	0.1013	0.0064	0.1276	0.1201	0.1662	0.1118	0.0949	0.1943	0.1926	0.2345	0.3117	0.1703	0.0959	0.0572	0	0.1667	0.2857	0.25	0.2857	0	0.0308	0.0753	0.0324	0.2222	0	0	0.2857	0.3333	0	0.3708	0	0	0.1818	0	0.3333	0.1818	0.0068	0.3397	0.25	0.095	0.1238	0	0.0345	0
0.0165	0.2337	0	0.0773	0.0357	0.0378	0.0171	0.0068	0.0424	0.042	0.0118	0.1678	0	0.0628	0.0996	0	0.0109	0.122	0.0161	0	0	0.2073	0	0.0375	0.0066	0	0	0.0143	0.0627	0.0682	0.0066	0.0185	0.0055	0.4	0	0.0383	0.0818	0.0644	0.0809	0.0252	0	0	0.0154	0	0	0.0182	0.0201	0.0146	0.0414	0.0142
0.3333	0.2	0	0.0259	0.156	0.1463	0.1013	0.0064	0.1276	0.1201	0.1662	0.1118	0.0949	0.1943	0.1926	0.2345	0.3117	0.1703	0.0959	0.0572	0	0.1667	0.2857	0.25	0.2857	0	0.0308	0.0753	0.0324	0.2222	0	0	0.2857	0.3333	0	0.3708	0	0	0.1818	0	0.3333	0.1818	0.0068	0.3397	0.25	0.095	0.1238	0	0.0345	0
0	0	0	0.0345	0.0198	0.0183	0	0	0	0	0	0.1111	0	0.0488	0	0	0	0.0854	0.01	0	0	0.2	0	0	0	0	0	0.0037	0	0	0	0	0	0.5	0	0.0207	0	0	0	0	0	0	0.004	0	0	0	0	0	0.0517	0
0	0	0	0	0	0	0	0	0	0	0	0	0	0	0	0	0	0	0	0	0	0	0	0	0	0	0	0	0	0	0	0	0	0	0	0	0	0	0	0	0	0	0	0	0	0	0	0	0	0
0	0	0	0.0345	0.0198	0.0183	0	0	0	0	0	0.1111	0	0.0488	0	0	0	0.0854	0.01	0	0	0.2	0	0	0	0	0	0.0037	0	0	0	0	0	0.5	0	0.0207	0	0	0	0	0	0	0.004	0	0	0	0	0	0.0517	0
0	0	0	0.0345	0.0198	0.0183	0	0	0	0	0	0.1111	0	0.0488	0	0	0	0.0854	0.01	0	0	0.2	0	0	0	0	0	0.0037	0	0	0	0	0	0.5	0	0.0207	0	0	0	0	0	0	0.004	0	0	0	0	0	0.0517	0
0	0	0	0	0	0	0	0	0	0	0	0	0	0	0	0	0	0	0	0	0	0	0	0	0	0	0	0	0	0	0	0	0	0	0	0	0	0	0	0	0	0	0	0	0	0	0	0	0	0
0.5402	0.426	0	0.112	0.4417	0.3625	0.4843	0.4254	0.2561	0.3639	0.2563	0.2312	0.3023	0.3177	0.4742	0.5957	0.2637	0.2621	0.2717	0.0874	0	0.1511	0.5589	0.3649	0.3232	0	0.0271	0.4351	0.3248	0.4233	0.0995	0.2366	0.3134	0.1631	0.5645	0.2322	0.533	0.4617	0.4329	0.1482	0.5454	0.4495	0.3969	0.3839	0.8127	0.2898	0.2382	0.5948	0.042	0.1183
0	0	0	0	0	0	0	0	0	0	0	0	0	0	0	0	0	0	0	0	0	0	0	0	0	0	0	0	0	0	0	0	0	0	0	0	0	0	0	0	0	0	0	0	0	0	0	0	0	0
0.4031	0.3388	0	0.1237	0.4151	0.4136	0.4143	0.3661	0.2869	0.4177	0.284	0.3002	0.3579	0.3605	0.3497	0.368	0.2797	0.2017	0.2907	0.0318	0	0.2269	0.5183	0.498	0.3497	0	0.0242	0.4395	0.3444	0.522	0.1508	0.3826	0.3196	0.1885	0.3052	0.2698	0.406	0.3762	0.4472	0.1817	0.3631	0.3954	0.3949	0.2876	0.4239	0.2675	0.2534	0.4102	0.0932	0.1654
0.4151	0.2896	0	0.1141	0.4736	0.5274	0.4148	0.375	0.1889	0.3929	0.2886	0.3345	0.4656	0.3803	0.3285	0.3656	0.2588	0.2413	0.3146	0.0286	0	0.3004	0.5235	0.4737	0.3244	0	0.0286	0.5175	0.3829	0.4596	0.1463	0.4838	0.2984	0.1957	0.3891	0.2709	0.3841	0.3599	0.4214	0.1677	0.3513	0.4723	0.4539	0.2849	0.4161	0.3239	0.3629	0.5028	0.1071	0.1557
0.4295	0.2746	0	0.1077	0.3389	0.2562	0.4088	0.4481	0.2555	0.3744	0.1233	0.2257	0.2287	0.2194	0.322	0.4425	0.0571	0.2515	0.2615	0.0294	0	0.1584	0.3831	0.268	0.1356	0	0.0164	0.3791	0.3022	0.2909	0.1009	0.2458	0.1182	0.1579	0.6159	0.0755	0.5743	0.4848	0.2884	0.142	0.3423	0.3136	0.4056	0.2405	0.7141	0.284	0.2364	0.6549	0.0446	0.1249
0.2412	0.2222	0	0.0295	0.1661	0.162	0.1111	0.0591	0.0495	0.0579	0.2143	0.0269	0.1208	0.1136	0.2178	0.2453	0.3333	0.0219	0.0323	0.0714	0	0.0297	0.3333	0.1842	0.3333	0	0.0472	0.1527	0.0646	0.2909	0	0.0409	0.3333	0	0.0926	0.2039	0.0594	0.0473	0.2112	0	0.4	0.2418	0.0979	0.199	0.333	0.0233	0.0615	0.0487	0	0
0	0	0	0	0	0	0	0	0	0	0	0	0	0	0	0	0	0	0	0	0	0	0	0	0	0	0	0	0	0	0	0	0	0	0	0	0	0	0	0	0	0	0	0	0	0	0	0	0	0
0	0	0	0	0	0	0	0	0	0	0	0	0	0	0	0	0	0	0	0	0	0	0	0	0	0	0	0	0	0	0	0	0	0	0	0	0	0	0	0	0	0	0	0	0	0	0	0	0	0
0.5283	0.4392	0	0.106	0.4493	0.3669	0.5609	0.4209	0.2468	0.3603	0.2397	0.2504	0.3067	0.3624	0.4844	0.6248	0.2704	0.2641	0.2878	0.0874	0	0.1462	0.5868	0.3611	0.3278	0	0.0228	0.3848	0.3494	0.415	0.1063	0.2462	0.3202	0.2305	0.5517	0.2367	0.5282	0.458	0.4488	0.1539	0.5645	0.4811	0.3406	0.3917	0.8183	0.3068	0.2258	0.6037	0.0448	0.125
0	0	0	0	0	0	0	0	0	0	0	0	0	0	0	0	0	0	0	0	0	0	0	0	0	0	0	0	0	0	0	0	0	0	0	0	0	0	0	0	0	0	0	0	0	0	0	0	0	0
0	0	0	0	0	0	0	0	0	0	0	0	0	0	0	0	0	0	0	0	0	0	0	0	0	0	0	0	0	0	0	0	0	0	0	0	0	0	0	0	0	0	0	0	0	0	0	0	0	0
0.4194	0.2093	0	0.4219	0.5479	0.4911	0.522	0.5398	0.3489	0.5742	0.2565	0.414	0.5029	0.4098	0.2693	0.2644	0.1549	0.34	0.4757	0	0	0.409	0.3554	0.4471	0.326	0	0.0128	0.5484	0.3341	0.2098	0.3746	0.4596	0.2989	0.2993	0.3823	0.4415	0.5382	0.5402	0.3503	0.4604	0.2503	0.2855	0.5631	0.2226	0.33	0.3955	0.452	0.4766	0.392	0.3047
0	0	0	0	0	0	0	0	0	0	0	0	0	0	0	0	0	0	0	0	0	0	0	0	0	0	0	0	0	0	0	0	0	0	0	0	0	0	0	0	0	0	0	0	0	0	0	0	0	0
0.2205	0.3369	0	0.2813	0.0769	0.0974	0.1503	0.157	0.1962	0.282	0.055	0.1832	0.0927	0.1412	0.233	0.0771	0.0607	0.1864	0.124	0	0	0.2741	0.0923	0.178	0.1174	0	0	0.1616	0.173	0.2995	0.1754	0.1333	0.1144	0.1886	0.1567	0.1998	0.3506	0.3171	0.2941	0.3399	0.1846	0.1419	0.1595	0.1542	0.0578	0.1839	0.1996	0.1334	0.0162	0.0864
0	0	0	0	0	0	0	0	0	0	0	0	0	0	0	0	0	0	0	0	0	0	0	0	0	0	0	0	0	0	0	0	0	0	0	0	0	0	0	0	0	0	0	0	0	0	0	0	0	0
0	0	0	0	0	0	0	0	0	0	0	0	0	0	0	0	0	0	0	0	0	0	0	0	0	0	0	0	0	0	0	0	0	0	0	0	0	0	0	0	0	0	0	0	0	0	0	0	0	0
0	0	0	0	0	0	0	0	0	0	0	0	0	0	0	0	0	0	0	0	0	0	0	0	0	0	0	0	0	0	0	0	0	0	0	0	0	0	0	0	0	0	0	0	0	0	0	0	0	0
0	0	0	0	0	0	0	0	0	0	0	0	0	0	0	0	0	0	0	0	0	0	0	0	0	0	0	0	0	0	0	0	0	0	0	0	0	0	0	0	0	0	0	0	0	0	0	0	0	0
0	0	0	0	0	0	0	0	0	0	0	0	0	0	0	0	0	0	0	0	0	0	0	0	0	0	0	0	0	0	0	0	0	0	0	0	0	0	0	0	0	0	0	0	0	0	0	0	0	0
0.4923	0.2767	0	0.107	0.3383	0.4086	0.462	0.5087	0.3712	0.5509	0.1279	0.2979	0.2928	0.3414	0.3075	0.4199	0.0999	0.3	0.3106	0.0221	0	0.3665	0.5347	0.3319	0.4771	0	0.0124	0.4931	0.5995	0.403	0.2898	0.5007	0.2606	0.1812	0.6565	0.1057	0.5291	0.5254	0.3022	0.2926	0.3186	0.4083	0.5228	0.237	0.6277	0.4168	0.3686	0.7345	0.0455	0.485
0	0	0	0	0	0	0	0	0	0	0	0	0	0	0	0	0	0	0	0	0	0	0	0	0	0	0	0	0	0	0	0	0	0	0	0	0	0	0	0	0	0	0	0	0	0	0	0	0	0
0	0	0	0	0	0	0	0	0	0	0	0	0	0	0	0	0	0	0	0	0	0	0	0	0	0	0	0	0	0	0	0	0	0	0	0	0	0	0	0	0	0	0	0	0	0	0	0	0	0
0	0	0	0	0	0	0	0	0	0	0	0	0	0	0	0	0	0	0	0	0	0	0	0	0	0	0	0	0	0	0	0	0	0	0	0	0	0	0	0	0	0	0	0	0	0	0	0	0	0
0	0	0	0	0	0	0	0	0	0	0	0	0	0	0	0	0	0	0	0	0	0	0	0	0	0	0	0	0	0	0	0	0	0	0	0	0	0	0	0	0	0	0	0	0	0	0	0	0	0
0	0	0	0	0	0	0	0	0	0	0	0	0	0	0	0	0	0	0	0	0	0	0	0	0	0	0	0	0	0	0	0	0	0	0	0	0	0	0	0	0	0	0	0	0	0	0	0	0	0
0.4894	0.321	0	0.0936	0.4142	0.4925	0.4053	0.3406	0.1546	0.2506	0.2372	0.5156	0.4506	0.3597	0.3452	0.3752	0.2073	0.3103	0.3375	0.026	0	0.1626	0.4939	0.4254	0.3484	0	0.017	0.445	0.6259	0.2955	0.1267	0.2821	0.2657	0.2908	0.1932	0.3405	0.4534	0.4109	0.4674	0.1496	0.3188	0.3896	0.3894	0.2509	0.3289	0.3898	0.2748	0.2988	0.0867	0.1882
0.1154	0.0243	0	0.0207	0.2435	0.2222	0.086	0.0808	0.0187	0.0598	0.0659	0.257	0.2743	0.0449	0.0212	0.0305	0.0074	0.1105	0.1833	0	0	0.0265	0.1447	0.0921	0.0239	0	0.0109	0.1717	0.042	0.038	0.0327	0.103	0.019	0.0516	0.0436	0.2258	0.0936	0.0726	0.091	0.0337	0.0477	0.0364	0.1648	0.0276	0.0458	0.145	0.1843	0.108	0.1056	0.0209
0	0	0	0	0	0	0	0	0	0	0	0	0	0	0	0	0	0	0	0	0	0	0	0	0	0	0	0	0	0	0	0	0	0	0	0	0	0	0	0	0	0	0	0	0	0	0	0	0	0
0.6922	0.3903	0	0.2249	0.3972	0.4011	0.3212	0.2005	0.4634	0.4301	0.3023	0.2971	0.3266	0.3703	0.3381	0.2896	0.2292	0.2684	0.322	0.0318	0	0.2307	0.5127	0.5716	0.4123	0	0.0664	0.3984	0.4363	0.4258	0.255	0.3072	0.4148	0.1269	0.1681	0.3785	0.2236	0.2151	0.3543	0.2505	0.3169	0.5286	0.3416	0.4855	0.3089	0.2537	0.3448	0.2052	0.0575	0.2271
0	0	0	0	0	0	0	0	0	0	0	0	0	0	0	0	0	0	0	0	0	0	0	0	0	0	0	0	0	0	0	0	0	0	0	0	0	0	0	0	0	0	0	0	0	0	0	0	0	0
0	0	0	0	0	0	0	0	0	0	0	0	0	0	0	0	0	0	0	0	0	0	0	0	0	0	0	0	0	0	0	0	0	0	0	0	0	0	0	0	0	0	0	0	0	0	0	0	0	0
0.3975	0.313	0	0.4393	0.5332	0.4949	0.5145	0.5098	0.2783	0.4398	0.2876	0.4459	0.4187	0.4088	0.2699	0.2759	0.2507	0.3339	0.436	0.0196	0	0.4204	0.4907	0.305	0.1979	0	0.0065	0.5194	0.3486	0.2064	0.2591	0.4857	0.2003	0.3491	0.3589	0.5337	0.5189	0.4676	0.4554	0.3675	0.4029	0.4031	0.526	0.3159	0.3167	0.4523	0.3845	0.5633	0.3964	0.3132
0.6468	0.5704	0	0.2658	0.5355	0.4435	0.5525	0.4141	0.3231	0.4322	0.3478	0.2201	0.3046	0.3565	0.5333	0.6065	0.2805	0.3018	0.321	0.066	0	0.2656	0.5948	0.4461	0.3479	0	0.0843	0.4293	0.3159	0.4374	0.2923	0.3744	0.5299	0.1646	0.5551	0.2352	0.5288	0.4544	0.4379	0.2949	0.5716	0.6085	0.3867	0.4954	0.8493	0.2819	0.3096	0.6107	0.0422	0.1186
0.4467	0.277	0	0.0404	0.4665	0.3668	0.3565	0.2702	0.1902	0.2486	0.3418	0.4025	0.4312	0.2849	0.2719	0.3366	0.2683	0.3768	0.4209	0.0408	0	0.0987	0.3881	0.3667	0.2953	0	0.029	0.3487	0.1674	0.2349	0.0568	0.1833	0.2986	0.1658	0.122	0.6086	0.2681	0.2466	0.2935	0.0852	0.3297	0.2982	0.2796	0.3658	0.3188	0.4187	0.3381	0.2046	0.2822	0.0458
0.4405	0.3402	0	0.4562	0.2407	0.3348	0.2677	0.319	0.3476	0.446	0.1863	0.2337	0.24	0.2174	0.2531	0.1225	0.0627	0.2376	0.2888	0	0	0.4345	0.1943	0.4426	0.1451	0	0.0661	0.3382	0.2604	0.3771	0.4369	0.365	0.3515	0.2741	0.2412	0.2231	0.3794	0.4045	0.3995	0.5276	0.2654	0.4095	0.3466	0.4114	0.1202	0.1879	0.3416	0.2207	0.0389	0.0922
0	0	0	0	0	0	0	0	0	0	0	0	0	0	0	0	0	0	0	0	0	0	0	0	0	0	0	0	0	0	0	0	0	0	0	0	0	0	0	0	0	0	0	0	0	0	0	0	0	0
0.371	0.441	0	0.3355	0.5421	0.6365	0.5116	0.3454	0.2902	0.3309	0.4944	0.325	0.4261	0.4428	0.3467	0.3336	0.4116	0.3205	0.4447	0.0306	0	0.4743	0.3268	0.3964	0.351	0	0.053	0.5437	0.3501	0.1975	0.3226	0.5653	0.5052	0.1313	0.1188	0.6294	0.1864	0.3133	0.275	0.3143	0.2644	0.3553	0.4893	0.3031	0.2639	0.3895	0.492	0.3677	0.2567	0.3022
0	0	0	0	0	0	0	0	0	0	0	0	0	0	0	0	0	0	0	0	0	0	0	0	0	0	0	0	0	0	0	0	0	0	0	0	0	0	0	0	0	0	0	0	0	0	0	0	0	0
0.4462	0.2387	0	0.0287	0.2476	0.3272	0.2954	0.1295	0.1647	0.2056	0.185	0.1631	0.2145	0.2605	0.255	0.3187	0.2927	0.1474	0.1965	0.0476	0	0.0522	0.4044	0.4169	0.2831	0	0.0256	0.252	0.224	0.246	0.0469	0.1335	0.2857	0.1647	0.0767	0.3723	0.1346	0.1155	0.2814	0.049	0.3626	0.2972	0.1897	0.3684	0.3007	0.1935	0.183	0.1448	0.0291	0.0374
0.5274	0.4329	0	0.1077	0.4542	0.3797	0.518	0.5081	0.2461	0.3678	0.2469	0.2702	0.3248	0.339	0.4828	0.6146	0.252	0.3146	0.3048	0.0777	0	0.1675	0.5722	0.3699	0.3376	0	0.0202	0.3982	0.3569	0.4098	0.1154	0.2693	0.3159	0.237	0.5472	0.2352	0.6123	0.5329	0.4511	0.1698	0.5282	0.4688	0.3544	0.3833	0.785	0.3592	0.2397	0.5996	0.0576	0.1372
0.4425	0.3216	0	0.1219	0.363	0.276	0.4324	0.4611	0.2656	0.3848	0.1175	0.2428	0.2373	0.232	0.3298	0.4699	0.0797	0.2754	0.2765	0.0689	0	0.1617	0.4487	0.2696	0.154	0	0.0094	0.3345	0.3248	0.2916	0.1244	0.2676	0.1417	0.2097	0.6293	0.0954	0.588	0.4954	0.3337	0.1779	0.4155	0.3442	0.355	0.2811	0.7587	0.2994	0.2328	0.6881	0.054	0.1479
0	0	0	0	0	0	0	0	0	0	0	0	0	0	0	0	0	0	0	0	0	0	0	0	0	0	0	0	0	0	0	0	0	0	0	0	0	0	0	0	0	0	0	0	0	0	0	0	0	0
0	0	0	0	0	0	0	0	0	0	0	0	0	0	0	0	0	0	0	0	0	0	0	0	0	0	0	0	0	0	0	0	0	0	0	0	0	0	0	0	0	0	0	0	0	0	0	0	0	0
0	0	0	0	0	0	0	0	0	0	0	0	0	0	0	0	0	0	0	0	0	0	0	0	0	0	0	0	0	0	0	0	0	0	0	0	0	0	0	0	0	0	0	0	0	0	0	0	0	0
0	0	0	0	0	0	0	0	0	0	0	0	0	0	0	0	0	0	0	0	0	0	0	0	0	0	0	0	0	0	0	0	0	0	0	0	0	0	0	0	0	0	0	0	0	0	0	0	0	0
0	0	0	0	0	0	0	0	0	0	0	0	0	0	0	0	0	0	0	0	0	0	0	0	0	0	0	0	0	0	0	0	0	0	0	0	0	0	0	0	0	0	0	0	0	0	0	0	0	0
0	0	0	0	0	0	0	0	0	0	0	0	0	0	0	0	0	0	0	0	0	0	0	0	0	0	0	0	0	0	0	0	0	0	0	0	0	0	0	0	0	0	0	0	0	0	0	0	0	0
0.5933	0.3746	0	0.0887	0.529	0.4624	0.4866	0.4077	0.2108	0.3468	0.3624	0.3514	0.5198	0.3643	0.4356	0.546	0.2312	0.27	0.4168	0.0514	0	0.1481	0.5403	0.5385	0.301	0	0.0239	0.5358	0.3275	0.4021	0.115	0.2441	0.2858	0.1567	0.5015	0.2885	0.5092	0.4457	0.4281	0.1457	0.4854	0.4041	0.4705	0.3482	0.7209	0.3927	0.3235	0.5657	0.2871	0.1114
0.2524	0.3353	0	0.0628	0.2116	0.2346	0.2426	0.2535	0.1062	0.1239	0.3408	0.0677	0.148	0.2209	0.2356	0.2852	0.6667	0.0562	0.0894	0.0714	0	0.265	0.4578	0.2142	0.4493	0	0.0384	0.2233	0.1436	0.2802	0.1213	0.3727	0.4515	0.0875	0.0642	0.4065	0.1074	0.1236	0.2879	0.1199	0.4742	0.2851	0.1609	0.237	0.3579	0.1661	0.1943	0.3222	0.0099	0.3889
0	0	0	0	0	0	0	0	0	0	0	0	0	0	0	0	0	0	0	0	0	0	0	0	0	0	0	0	0	0	0	0	0	0	0	0	0	0	0	0	0	0	0	0	0	0	0	0	0	0
0	0	0	0	0	0	0	0	0	0	0	0	0	0	0	0	0	0	0	0	0	0	0	0	0	0	0	0	0	0	0	0	0	0	0	0	0	0	0	0	0	0	0	0	0	0	0	0	0	0
0.5563	0.4565	0	0.0927	0.455	0.3624	0.4947	0.4231	0.2349	0.3549	0.2495	0.2205	0.3053	0.3121	0.4772	0.6329	0.3071	0.2454	0.2673	0.077	0	0.1458	0.6331	0.365	0.3856	0	0.0303	0.3828	0.3224	0.4745	0.1009	0.2295	0.3682	0.1579	0.5866	0.2481	0.5474	0.4642	0.4504	0.142	0.628	0.4666	0.3354	0.3932	0.924	0.2848	0.2299	0.6401	0.0446	0.1249
0	0	0	0	0	0	0	0	0	0	0	0	0	0	0	0	0	0	0	0	0	0	0	0	0	0	0	0	0	0	0	0	0	0	0	0	0	0	0	0	0	0	0	0	0	0	0	0	0	0
0.0639	0.0687	0	0.033	0.074	0.076	0.1946	0.1145	0.0511	0.0827	0.0268	0.0872	0.0583	0.1075	0.071	0.1074	0.0267	0.0476	0.0811	0	0	0.0512	0.1493	0.0633	0.0307	0	0	0.0654	0.1135	0.0269	0.0416	0.1272	0.0449	0.2463	0.0713	0.0238	0.1151	0.0977	0.0941	0.0451	0.0928	0.1554	0.0679	0.053	0.0842	0.0883	0.0419	0.133	0.0123	0.0391
0.0242	0.0192	0	0.0078	0.0158	0.0152	0.0096	0.0159	0.0131	0.0142	0.0208	0.0124	0.0166	0.0261	0.0835	0.1098	0.0308	0.0053	0.0512	0.359	0	0.0071	0.0308	0.0194	0.0308	0	0.6667	0.0093	0.011	0.027	0	0.0101	0.0308	0	0.0236	0.019	0.0148	0.0125	0.0201	0	0.0384	0.0249	0.0087	0.2104	0.0352	0.0133	0.0314	0.0124	0	0
0.1979	0.2418	0	0.2906	0.1579	0.1474	0.2044	0.0147	0.0118	0.011	0.3264	0.015	0.0934	0.1107	0.1951	0.2418	0.3333	0.0935	0.0199	0.5715	0	0	0.3627	0.1333	0.3333	0	0.0384	0.0777	0.0473	0.25	0	0	0.3333	0	0.0176	0.3857	0.016	0.0118	0.4088	0.0257	0.4353	0.2176	0.0068	0.3786	0.3109	0.0164	0.1311	0.0196	0	0
0	0	0	0	0	0	0	0	0	0	0	0	0	0	0	0	0	0	0	0	0	0	0	0	0	0	0	0	0	0	0	0	0	0	0	0	0	0	0	0	0	0	0	0	0	0	0	0	0	0
0	0	0	0	0	0	0	0	0	0	0	0	0	0	0	0	0	0	0	0	0	0	0	0	0	0	0	0	0	0	0	0	0	0	0	0	0	0	0	0	0	0	0	0	0	0	0	0	0	0
0	0	0	0	0	0	0	0	0	0	0	0	0	0	0	0	0	0	0	0	0	0	0	0	0	0	0	0	0	0	0	0	0	0	0	0	0	0	0	0	0	0	0	0	0	0	0	0	0	0
0	0	0	0	0	0	0	0	0	0	0	0	0	0	0	0	0	0	0	0	0	0	0	0	0	0	0	0	0	0	0	0	0	0	0	0	0	0	0	0	0	0	0	0	0	0	0	0	0	0
0	0	0	0	0	0	0	0	0	0	0	0	0	0	0	0	0	0	0	0	0	0	0	0	0	0	0	0	0	0	0	0	0	0	0	0	0	0	0	0	0	0	0	0	0	0	0	0	0	0
0	0	0	0	0	0	0	0	0	0	0	0	0	0	0	0	0	0	0	0	0	0	0	0	0	0	0	0	0	0	0	0	0	0	0	0	0	0	0	0	0	0	0	0	0	0	0	0	0	0
0.436	0.3021	0	0.1043	0.352	0.26	0.423	0.4556	0.2496	0.3758	0.107	0.2288	0.2316	0.2207	0.3207	0.4662	0.0652	0.2548	0.2666	0.0353	0	0.158	0.4378	0.2628	0.1549	0	0.0113	0.3271	0.3115	0.305	0.1153	0.255	0.1351	0.1842	0.64	0.0818	0.593	0.4932	0.3096	0.1578	0.3993	0.3272	0.3478	0.2553	0.7895	0.2892	0.23	0.7041	0.0521	0.1428
0	0	0	0	0	0	0	0	0	0	0	0	0	0	0	0	0	0	0	0	0	0	0	0	0	0	0	0	0	0	0	0	0	0	0	0	0	0	0	0	0	0	0	0	0	0	0	0	0	0
0.2399	0.0611	0	0.0283	0.0782	0.0798	0.187	0.1084	0.181	0.2026	0.028	0.0849	0.0576	0.1526	0.0826	0.1234	0.0525	0.1428	0.1567	0	0	0.0465	0.1244	0.1924	0.0256	0	0	0.0678	0.1054	0.0235	0.0346	0.1113	0.0374	0.1971	0.0642	0.2035	0.1046	0.0912	0.0847	0.0394	0.0742	0.1399	0.0704	0.23	0.0722	0.1782	0.1571	0.1182	0.0099	0.0326
0	0	0	0	0	0	0	0	0	0	0	0	0	0	0	0	0	0	0	0	0	0	0	0	0	0	0	0	0	0	0	0	0	0	0	0	0	0	0	0	0	0	0	0	0	0	0	0	0	0
0.2665	0.3132	0	0.1001	0.2249	0.2294	0.2446	0.3062	0.2191	0.2489	0.0737	0.1844	0.108	0.1551	0.1525	0.2262	0.069	0.1669	0.1711	0.0588	0	0.1268	0.4795	0.1139	0.0951	0	0	0.1767	0.249	0.0672	0.1123	0.2203	0.1288	0.1886	0.3063	0.0714	0.2999	0.2578	0.3091	0.147	0.5171	0.3417	0.1827	0.2614	0.3967	0.181	0.1062	0.3877	0.0321	0.1075
0	0	0	0	0	0	0	0	0	0	0	0	0	0	0	0	0	0	0	0	0	0	0	0	0	0	0	0	0	0	0	0	0	0	0	0	0	0	0	0	0	0	0	0	0	0	0	0	0	0
0.2	0.25	0	0	0.1538	0.1429	0.1053	0	0	0	0.1869	0.0061	0.0978	0.1034	0.196	0.2472	0.4	0	0.0136	0.0953	0	0	0.4	0.1429	0.4	0	0.0513	0.0741	0.0374	0.2857	0	0	0.4	0	0	0.2243	0	0	0.2222	0	0.5	0.2222	0	0.2077	0.3333	0.0088	0.0143	0	0	0
0.2503	0.2882	0	0.3638	0.2175	0.2222	0.3279	0.2881	0.2104	0.2389	0.2151	0.1793	0.1031	0.1539	0.1495	0.2156	0.0575	0.2367	0.168	0.5221	0	0.1153	0.4143	0.1063	0.0792	0	0	0.1735	0.2375	0.0588	0.0936	0.1928	0.1073	0.1509	0.2845	0.2387	0.2807	0.2465	0.4694	0.1415	0.4313	0.3164	0.1791	0.4114	0.3527	0.1768	0.2124	0.3544	0.0256	0.0896
0.2503	0.2882	0	0.3638	0.2175	0.2222	0.3279	0.2881	0.2104	0.2389	0.2151	0.1793	0.1031	0.1539	0.1495	0.2156	0.0575	0.2367	0.168	0.5221	0	0.1153	0.4143	0.1063	0.0792	0	0	0.1735	0.2375	0.0588	0.0936	0.1928	0.1073	0.1509	0.2845	0.2387	0.2807	0.2465	0.4694	0.1415	0.4313	0.3164	0.1791	0.4114	0.3527	0.1768	0.2124	0.3544	0.0256	0.0896
0	0	0	0	0	0	0	0	0	0	0	0	0	0	0	0	0	0	0	0	0	0	0	0	0	0	0	0	0	0	0	0	0	0	0	0	0	0	0	0	0	0	0	0	0	0	0	0	0	0
0	0	0	0	0	0	0	0	0	0	0	0	0	0	0	0	0	0	0	0	0	0	0	0	0	0	0	0	0	0	0	0	0	0	0	0	0	0	0	0	0	0	0	0	0	0	0	0	0	0
0	0	0	0	0	0	0	0	0	0	0	0	0	0	0	0	0	0	0	0	0	0	0	0	0	0	0	0	0	0	0	0	0	0	0	0	0	0	0	0	0	0	0	0	0	0	0	0	0	0
0.2	0.25	0	0	0.1538	0.1429	0.1053	0	0	0	0.1869	0.0061	0.0978	0.1034	0.196	0.2472	0.4	0	0.0136	0.0953	0	0	0.4	0.1429	0.4	0	0.0513	0.0741	0.0374	0.2857	0	0	0.4	0	0	0.2243	0	0	0.2222	0	0.5	0.2222	0	0.2077	0.3333	0.0088	0.0143	0	0	0
0.3892	0.3858	0	0.118	0.436	0.4269	0.4181	0.3482	0.1642	0.2863	0.2983	0.2226	0.3571	0.3137	0.3072	0.3815	0.4262	0.1432	0.2765	0.0714	0	0.2125	0.7703	0.3964	0.5043	0	0.0384	0.364	0.2869	0.4099	0.2076	0.4205	0.5147	0.2541	0.2331	0.34	0.3392	0.3145	0.5176	0.2166	0.6136	0.4721	0.2944	0.3548	0.4928	0.2304	0.2111	0.4054	0.1308	0.1781
0.2683	0.2813	0	0.0478	0.2272	0.3198	0.1928	0.1241	0.0813	0.2047	0.2092	0.1529	0.2412	0.1974	0.2411	0.2976	0.3548	0.1201	0.0907	0.0714	0	0.2132	0.4524	0.2173	0.3582	0	0.0473	0.2032	0.2364	0.5071	0.0335	0.3157	0.3695	0.084	0.2802	0.2249	0.1139	0.1063	0.2942	0.0382	0.4717	0.4748	0.1438	0.2481	0.4068	0.1393	0.1763	0.3164	0.0095	0.0316
0.2	0.25	0	0	0.1538	0.1429	0.1053	0	0	0	0.1869	0.0061	0.0978	0.1034	0.196	0.2472	0.4	0	0.0136	0.0953	0	0	0.4	0.1429	0.4	0	0.0513	0.0741	0.0374	0.2857	0	0	0.4	0	0	0.2243	0	0	0.2222	0	0.5	0.2222	0	0.2077	0.3333	0.0088	0.0143	0	0	0
0.2	0.25	0	0	0.1538	0.1429	0.1053	0	0	0	0.1869	0.0061	0.0978	0.1034	0.196	0.2472	0.4	0	0.0136	0.0953	0	0	0.4	0.1429	0.4	0	0.0513	0.0741	0.0374	0.2857	0	0	0.4	0	0	0.2243	0	0	0.2222	0	0.5	0.2222	0	0.2077	0.3333	0.0088	0.0143	0	0	0
0	0	0	0	0	0	0	0	0	0	0	0	0	0	0	0	0	0	0	0	0	0	0	0	0	0	0	0	0	0	0	0	0	0	0	0	0	0	0	0	0	0	0	0	0	0	0	0	0	0
0.0176	0.0221	0	0.339	0.0162	0.015	0.1099	0.016	0.0126	0.0118	0.1667	0.0098	0	0.0099	0.0088	0.0147	0	0.0974	0.0071	0.6667	0	0	0.0353	0	0	0	0	0.0065	0.0136	0	0	0	0	0	0.0196	0.2	0.0176	0.0126	0.232	0.0293	0.0441	0.0196	0.0071	0.2088	0.0294	0.0084	0.125	0.0221	0	0
0	0	0	0	0	0	0	0	0	0	0	0	0	0	0	0	0	0	0	0	0	0	0	0	0	0	0	0	0	0	0	0	0	0	0	0	0	0	0	0	0	0	0	0	0	0	0	0	0	0
0.0176	0.0221	0	0.339	0.0162	0.015	0.1099	0.016	0.0126	0.0118	0.1667	0.0098	0	0.0099	0.0088	0.0147	0	0.0974	0.0071	0.6667	0	0	0.0353	0	0	0	0	0.0065	0.0136	0	0	0	0	0	0.0196	0.2	0.0176	0.0126	0.232	0.0293	0.0441	0.0196	0.0071	0.2088	0.0294	0.0084	0.125	0.0221	0	0
0	0	0	0	0	0	0	0	0	0	0	0	0	0	0	0	0	0	0	0	0	0	0	0	0	0	0	0	0	0	0	0	0	0	0	0	0	0	0	0	0	0	0	0	0	0	0	0	0	0
0.0176	0.0221	0	0.339	0.0162	0.015	0.1099	0.016	0.0126	0.0118	0.1667	0.0098	0	0.0099	0.0088	0.0147	0	0.0974	0.0071	0.6667	0	0	0.0353	0	0	0	0	0.0065	0.0136	0	0	0	0	0	0.0196	0.2	0.0176	0.0126	0.232	0.0293	0.0441	0.0196	0.0071	0.2088	0.0294	0.0084	0.125	0.0221	0	0
0	0	0	0	0	0	0	0	0	0	0	0	0	0	0	0	0	0	0	0	0	0	0	0	0	0	0	0	0	0	0	0	0	0	0	0	0	0	0	0	0	0	0	0	0	0	0	0	0	0
0	0	0	0	0	0	0	0	0	0	0	0	0	0	0	0	0	0	0	0	0	0	0	0	0	0	0	0	0	0	0	0	0	0	0	0	0	0	0	0	0	0	0	0	0	0	0	0	0	0
0	0	0	0	0	0	0	0	0	0	0	0	0	0	0	0	0	0	0	0	0	0	0	0	0	0	0	0	0	0	0	0	0	0	0	0	0	0	0	0	0	0	0	0	0	0	0	0	0	0
0	0	0	0	0	0	0	0	0	0	0	0	0	0	0	0	0	0	0	0	0	0	0	0	0	0	0	0	0	0	0	0	0	0	0	0	0	0	0	0	0	0	0	0	0	0	0	0	0	0
0.0816	0.0312	0	0.03	0.1509	0.1106	0.1729	0.088	0.0411	0.0757	0.1512	0.209	0.2638	0.0992	0.1285	0.05	0.3123	0.0953	0.2021	0	0	0.1008	0.1151	0.0902	0.0409	0	0.0084	0.2027	0.0547	0.2711	0.3309	0.0909	0.0319	0.057	0.0599	0.1243	0.0959	0.0848	0.0911	0.0537	0.0545	0.0497	0.2015	0.0541	0.0522	0.1207	0.1046	0.1004	0.1626	0.1337
0.0833	0.0689	0	0.2547	0.1446	0.1271	0.2602	0.1139	0.0543	0.0849	0.351	0.2293	0.2146	0.1241	0.1356	0.1545	0.1148	0.1641	0.2169	0.3879	0	0.2034	0.1395	0.0955	0.0401	0	0.0289	0.1497	0.1159	0.1127	0.1271	0.1074	0.043	0.1597	0.079	0.2409	0.1182	0.1039	0.2631	0.0663	0.0924	0.1395	0.1451	0.2163	0.0892	0.1465	0.2147	0.127	0.0947	0.2873
0	0	0	0	0	0	0	0	0	0	0	0	0	0	0	0	0	0	0	0	0	0	0	0	0	0	0	0	0	0	0	0	0	0	0	0	0	0	0	0	0	0	0	0	0	0	0	0	0	0
0	0	0	0	0	0	0	0	0	0	0	0	0	0	0	0	0	0	0	0	0	0	0	0	0	0	0	0	0	0	0	0	0	0	0	0	0	0	0	0	0	0	0	0	0	0	0	0	0	0
0	0	0	0	0	0	0	0	0	0	0	0	0	0	0	0	0	0	0	0	0	0	0	0	0	0	0	0	0	0	0	0	0	0	0	0	0	0	0	0	0	0	0	0	0	0	0	0	0	0
0	0	0	0	0	0	0	0	0	0	0	0	0	0	0	0	0	0	0	0	0	0	0	0	0	0	0	0	0	0	0	0	0	0	0	0	0	0	0	0	0	0	0	0	0	0	0	0	0	0
0	0	0	0	0	0	0	0	0	0	0	0	0	0	0	0	0	0	0	0	0	0	0	0	0	0	0	0	0	0	0	0	0	0	0	0	0	0	0	0	0	0	0	0	0	0	0	0	0	0
0	0	0	0	0	0	0	0	0	0	0	0	0	0	0	0	0	0	0	0	0	0	0	0	0	0	0	0	0	0	0	0	0	0	0	0	0	0	0	0	0	0	0	0	0	0	0	0	0	0
0	0	0	0	0	0	0	0	0	0	0	0	0	0	0	0	0	0	0	0	0	0	0	0	0	0	0	0	0	0	0	0	0	0	0	0	0	0	0	0	0	0	0	0	0	0	0	0	0	0
0	0	0	0	0	0	0	0	0	0	0	0	0	0	0	0	0	0	0	0	0	0	0	0	0	0	0	0	0	0	0	0	0	0	0	0	0	0	0	0	0	0	0	0	0	0	0	0	0	0
0	0	0	0	0	0	0	0	0	0	0	0	0	0	0	0	0	0	0	0	0	0	0	0	0	0	0	0	0	0	0	0	0	0	0	0	0	0	0	0	0	0	0	0	0	0	0	0	0	0
0	0	0	0	0	0	0	0	0	0	0	0	0	0	0	0	0	0	0	0	0	0	0	0	0	0	0	0	0	0	0	0	0	0	0	0	0	0	0	0	0	0	0	0	0	0	0	0	0	0
0	0	0	0	0	0	0	0	0	0	0	0	0	0	0	0	0	0	0	0	0	0	0	0	0	0	0	0	0	0	0	0	0	0	0	0	0	0	0	0	0	0	0	0	0	0	0	0	0	0
0	0	0	0	0	0	0	0	0	0	0	0	0	0	0	0	0	0	0	0	0	0	0	0	0	0	0	0	0	0	0	0	0	0	0	0	0	0	0	0	0	0	0	0	0	0	0	0	0	0
0.1476	0.1603	0	0.1017	0.1492	0.1633	0.2782	0.2589	0.139	0.1923	0.0786	0.1945	0.1318	0.1669	0.1587	0.2313	0.0822	0.1239	0.1872	0	0	0.1504	0.263	0.1416	0.1115	0	0	0.1533	0.2619	0.0801	0.1342	0.2745	0.1534	0.5212	0.1753	0.0746	0.2413	0.2236	0.185	0.1463	0.1926	0.3577	0.156	0.131	0.1883	0.2085	0.1189	0.2676	0.0391	0.1275
0.06	0.0334	0	0.0286	0.1251	0.0998	0.094	0.0634	0.0236	0.0482	0.0924	0.2001	0.219	0.0664	0.0548	0.0642	0.0265	0.06	0.1848	0.1091	0	0.0337	0.106	0.0785	0.0496	0	0.0577	0.1336	0.0436	0.0493	0.0403	0.0694	0.0415	0.0534	0.0489	0.1019	0.0706	0.0607	0.0733	0.0452	0.0655	0.045	0.1272	0.0472	0.056	0.097	0.1008	0.0765	0.1595	0.0323
0	0	0	0	0	0	0	0	0	0	0	0	0	0	0	0	0	0	0	0	0	0	0	0	0	0	0	0	0	0	0	0	0	0	0	0	0	0	0	0	0	0	0	0	0	0	0	0	0	0
0	0	0	0	0	0	0	0	0	0	0	0	0	0	0	0	0	0	0	0	0	0	0	0	0	0	0	0	0	0	0	0	0	0	0	0	0	0	0	0	0	0	0	0	0	0	0	0	0	0
0	0	0	0	0	0	0	0	0	0	0	0	0	0	0	0	0	0	0	0	0	0	0	0	0	0	0	0	0	0	0	0	0	0	0	0	0	0	0	0	0	0	0	0	0	0	0	0	0	0
0	0	0	0	0	0	0	0	0	0	0	0	0	0	0	0	0	0	0	0	0	0	0	0	0	0	0	0	0	0	0	0	0	0	0	0	0	0	0	0	0	0	0	0	0	0	0	0	0	0
0	0	0	0	0	0	0	0	0	0	0	0	0	0	0	0	0	0	0	0	0	0	0	0	0	0	0	0	0	0	0	0	0	0	0	0	0	0	0	0	0	0	0	0	0	0	0	0	0	0
0	0	0	0	0	0	0	0	0	0	0	0	0	0	0	0	0	0	0	0	0	0	0	0	0	0	0	0	0	0	0	0	0	0	0	0	0	0	0	0	0	0	0	0	0	0	0	0	0	0
0	0	0	0	0	0	0	0	0	0	0	0	0	0	0	0	0	0	0	0	0	0	0	0	0	0	0	0	0	0	0	0	0	0	0	0	0	0	0	0	0	0	0	0	0	0	0	0	0	0
0	0	0	0	0	0	0	0	0	0	0	0	0	0	0	0	0	0	0	0	0	0	0	0	0	0	0	0	0	0	0	0	0	0	0	0	0	0	0	0	0	0	0	0	0	0	0	0	0	0
0	0	0	0	0	0	0	0	0	0	0	0	0	0	0	0	0	0	0	0	0	0	0	0	0	0	0	0	0	0	0	0	0	0	0	0	0	0	0	0	0	0	0	0	0	0	0	0	0	0
0.297	0.337	0	0.3305	0.2708	0.2755	0.4422	0.2259	0.1271	0.1749	0.3704	0.1822	0.2073	0.2641	0.3265	0.4164	0.3444	0.2008	0.1872	0.4572	0	0.1254	0.4861	0.2489	0.3654	0	0.0308	0.2147	0.2653	0.2845	0.0958	0.2135	0.3953	0.3474	0.1515	0.4158	0.2085	0.2012	0.515	0.1366	0.4764	0.4825	0.1477	0.4489	0.4023	0.2023	0.2295	0.2229	0.026	0.0911
0.0248	0.0378	0	0.3062	0.034	0.0317	0.1061	0.0163	0.0287	0.0177	0.1564	0.0205	0.0015	0.0184	0.0297	0.0454	0.0447	0.1281	0.0466	0.5	0	0.0185	0.0294	0.0064	0	0	0	0.0138	0.0126	0	0	0	0	0.0384	0.0176	0.1961	0.016	0.0118	0.2088	0.0257	0.0353	0.0176	0.0149	0.1986	0.0252	0.0133	0.1246	0.0196	0.0218	0.0039
0	0	0	0	0	0	0	0	0	0	0	0	0	0	0	0	0	0	0	0	0	0	0	0	0	0	0	0	0	0	0	0	0	0	0	0	0	0	0	0	0	0	0	0	0	0	0	0	0	0
0	0	0	0	0	0	0	0	0	0	0	0	0	0	0	0	0	0	0	0	0	0	0	0	0	0	0	0	0	0	0	0	0	0	0	0	0	0	0	0	0	0	0	0	0	0	0	0	0	0
0	0	0	0	0	0	0	0	0	0	0	0	0	0	0	0	0	0	0	0	0	0	0	0	0	0	0	0	0	0	0	0	0	0	0	0	0	0	0	0	0	0	0	0	0	0	0	0	0	0
0.2408	0.2895	0	0.3439	0.2025	0.1955	0.182	0.1059	0.1775	0.1945	0.1825	0.0582	0.0599	0.1075	0.1306	0.0633	0.0273	0.1143	0.1294	0	0	0.2361	0.154	0.1824	0.0313	0	0.1361	0.1279	0.0731	0.0275	0.4146	0.3655	0.418	0.1124	0.0729	0.0244	0.1054	0.0911	0.0969	0.3119	0.095	0.3543	0.1353	0.2296	0.0861	0.0576	0.1577	0.1367	0.0126	0.04
0.1219	0.3274	0	0.1004	0.0956	0.2092	0.2547	0.2037	0.1201	0.1645	0.0789	0.1013	0.1011	0.1311	0.0819	0.1035	0.1091	0.1574	0.1548	0	0	0.2952	0.1455	0.1115	0.1303	0	0	0.1717	0.2273	0.0462	0.1086	0.417	0.1439	0.1186	0.1355	0.0861	0.1809	0.2817	0.1183	0.1506	0.1026	0.1114	0.1758	0.0803	0.1477	0.1814	0.2092	0.3923	0.0167	0.1557
0	0	0	0	0	0	0	0	0	0	0	0	0	0	0	0	0	0	0	0	0	0	0	0	0	0	0	0	0	0	0	0	0	0	0	0	0	0	0	0	0	0	0	0	0	0	0	0	0	0
0	0	0	0	0	0	0	0	0	0	0	0	0	0	0	0	0	0	0	0	0	0	0	0	0	0	0	0	0	0	0	0	0	0	0	0	0	0	0	0	0	0	0	0	0	0	0	0	0	0
0.2	0.25	0	0	0.1538	0.1429	0.1053	0	0	0	0.1869	0.0061	0.0978	0.1034	0.196	0.2472	0.4	0	0.0136	0.0953	0	0	0.4	0.1429	0.4	0	0.0513	0.0741	0.0374	0.2857	0	0	0.4	0	0	0.2243	0	0	0.2222	0	0.5	0.2222	0	0.2077	0.3333	0.0088	0.0143	0	0	0
0	0	0	0	0	0	0	0	0	0	0	0	0	0	0	0	0	0	0	0	0	0	0	0	0	0	0	0	0	0	0	0	0	0	0	0	0	0	0	0	0	0	0	0	0	0	0	0	0	0
0.1433	0.0316	0	0.0246	0.1043	0.206	0.0869	0.0991	0.0257	0.0737	0.0283	0.1255	0.1266	0.0468	0.0279	0.0392	0.0105	0.0344	0.0797	0	0	0.0384	0.1705	0.1902	0.0383	0	0	0.1725	0.1506	0.0508	0.0476	0.122	0.0301	0.0696	0.0585	0.0487	0.1133	0.0904	0.1105	0.0502	0.0655	0.0491	0.1764	0.0395	0.0585	0.054	0.0566	0.1282	0.0448	0.0329
0.0654	0	0	0.0345	0.025	0.0308	0.0117	0.0645	0.053	0.0618	0.0452	0.0223	0.0287	0.0129	0.0327	0.0185	0	0.0228	0.0199	0	0	0.0327	0	0.0545	0	0	0.0233	0.0842	0.0322	0.0467	0	0.0467	0	0	0.1029	0	0.0654	0.0507	0.0124	0	0	0.0465	0.1018	0.0147	0.0552	0.0156	0.0511	0.0548	0	0
0.2	0	0	0	0.0103	0.0095	0.0067	0.0075	0.1458	0.1361	0.0069	0.0071	0.0061	0.0515	0.0158	0.0263	0.0364	0.1012	0.0819	0	0	0	0	0.1429	0	0	0	0.0049	0	0	0	0	0	0	0	0.2	0	0	0	0	0	0	0.0053	0.2	0	0.0983	0.125	0	0	0
0	0	0	0	0	0	0	0	0	0	0	0	0	0	0	0	0	0	0	0	0	0	0	0	0	0	0	0	0	0	0	0	0	0	0	0	0	0	0	0	0	0	0	0	0	0	0	0	0	0
0	0	0	0	0	0	0	0	0	0	0	0	0	0	0	0	0	0	0	0	0	0	0	0	0	0	0	0	0	0	0	0	0	0	0	0	0	0	0	0	0	0	0	0	0	0	0	0	0	0
0	0	0	0	0	0	0	0	0	0	0	0	0	0	0	0	0	0	0	0	0	0	0	0	0	0	0	0	0	0	0	0	0	0	0	0	0	0	0	0	0	0	0	0	0	0	0	0	0	0
0	0	0	0	0	0	0	0	0	0	0	0	0	0	0	0	0	0	0	0	0	0	0	0	0	0	0	0	0	0	0	0	0	0	0	0	0	0	0	0	0	0	0	0	0	0	0	0	0	0
0	0	0	0	0	0	0	0	0	0	0	0	0	0	0	0	0	0	0	0	0	0	0	0	0	0	0	0	0	0	0	0	0	0	0	0	0	0	0	0	0	0	0	0	0	0	0	0	0	0
0	0	0	0	0	0	0	0	0	0	0	0	0	0	0	0	0	0	0	0	0	0	0	0	0	0	0	0	0	0	0	0	0	0	0	0	0	0	0	0	0	0	0	0	0	0	0	0	0	0
0	0	0	0	0	0	0	0	0	0	0	0	0	0	0	0	0	0	0	0	0	0	0	0	0	0	0	0	0	0	0	0	0	0	0	0	0	0	0	0	0	0	0	0	0	0	0	0	0	0
0	0	0	0	0	0	0	0	0	0	0	0	0	0	0	0	0	0	0	0	0	0	0	0	0	0	0	0	0	0	0	0	0	0	0	0	0	0	0	0	0	0	0	0	0	0	0	0	0	0
0.2	0.25	0	0	0.1538	0.1429	0.1053	0	0	0	0.1869	0.0061	0.0978	0.1034	0.196	0.2472	0.4	0	0.0136	0.0953	0	0	0.4	0.1429	0.4	0	0.0513	0.0741	0.0374	0.2857	0	0	0.4	0	0	0.2243	0	0	0.2222	0	0.5	0.2222	0	0.2077	0.3333	0.0088	0.0143	0	0	0
0	0	0	0	0	0	0	0	0	0	0	0	0	0	0	0	0	0	0	0	0	0	0	0	0	0	0	0	0	0	0	0	0	0	0	0	0	0	0	0	0	0	0	0	0	0	0	0	0	0
0	0	0	0	0	0	0	0	0	0	0	0	0	0	0	0	0	0	0	0	0	0	0	0	0	0	0	0	0	0	0	0	0	0	0	0	0	0	0	0	0	0	0	0	0	0	0	0	0	0
0.0176	0.0221	0	0.339	0.0162	0.015	0.1099	0.016	0.0126	0.0118	0.1667	0.0098	0	0.0099	0.0088	0.0147	0	0.0974	0.0071	0.6667	0	0	0.0353	0	0	0	0	0.0065	0.0136	0	0	0	0	0	0.0196	0.2	0.0176	0.0126	0.232	0.0293	0.0441	0.0196	0.0071	0.2088	0.0294	0.0084	0.125	0.0221	0	0
0.2	0.25	0	0	0.1538	0.1429	0.1053	0	0	0	0.1869	0.0061	0.0978	0.1034	0.196	0.2472	0.4	0	0.0136	0.0953	0	0	0.4	0.1429	0.4	0	0.0513	0.0741	0.0374	0.2857	0	0	0.4	0	0	0.2243	0	0	0.2222	0	0.5	0.2222	0	0.2077	0.3333	0.0088	0.0143	0	0	0
0	0	0	0	0	0	0	0	0	0	0	0	0	0	0	0	0	0	0	0	0	0	0	0	0	0	0	0	0	0	0	0	0	0	0	0	0	0	0	0	0	0	0	0	0	0	0	0	0	0
0.2	0.25	0	0	0.1538	0.1429	0.1053	0	0	0	0.1869	0.0061	0.0978	0.1034	0.196	0.2472	0.4	0	0.0136	0.0953	0	0	0.4	0.1429	0.4	0	0.0513	0.0741	0.0374	0.2857	0	0	0.4	0	0	0.2243	0	0	0.2222	0	0.5	0.2222	0	0.2077	0.3333	0.0088	0.0143	0	0	0
0	0	0	0	0	0	0	0	0	0	0	0	0	0	0	0	0	0	0	0	0	0	0	0	0	0	0	0	0	0	0	0	0	0	0	0	0	0	0	0	0	0	0	0	0	0	0	0	0	0
0.0923	0.0366	0	0.0328	0.0856	0.0779	0.1697	0.0943	0.0323	0.0711	0.0346	0.0825	0.0912	0.0612	0.1187	0.1883	0.0132	0.0346	0.075	0	0	0.0479	0.1733	0.0703	0.1072	0	0	0.1496	0.1092	0.307	0.0585	0.1063	0.0419	0.0787	0.2615	0.0425	0.2634	0.202	0.1017	0.0642	0.0755	0.0563	0.1544	0.0485	0.3549	0.1469	0.0471	0.3123	0.0549	0.0987
0.0176	0.0221	0	0.339	0.0162	0.015	0.1099	0.016	0.0126	0.0118	0.1667	0.0098	0	0.0099	0.0088	0.0147	0	0.0974	0.0071	0.6667	0	0	0.0353	0	0	0	0	0.0065	0.0136	0	0	0	0	0	0.0196	0.2	0.0176	0.0126	0.232	0.0293	0.0441	0.0196	0.0071	0.2088	0.0294	0.0084	0.125	0.0221	0	0
0.0176	0.0221	0	0.339	0.0162	0.015	0.1099	0.016	0.0126	0.0118	0.1667	0.0098	0	0.0099	0.0088	0.0147	0	0.0974	0.0071	0.6667	0	0	0.0353	0	0	0	0	0.0065	0.0136	0	0	0	0	0	0.0196	0.2	0.0176	0.0126	0.232	0.0293	0.0441	0.0196	0.0071	0.2088	0.0294	0.0084	0.125	0.0221	0	0
0.0176	0.0221	0	0.339	0.0162	0.015	0.1099	0.016	0.0126	0.0118	0.1667	0.0098	0	0.0099	0.0088	0.0147	0	0.0974	0.0071	0.6667	0	0	0.0353	0	0	0	0	0.0065	0.0136	0	0	0	0	0	0.0196	0.2	0.0176	0.0126	0.232	0.0293	0.0441	0.0196	0.0071	0.2088	0.0294	0.0084	0.125	0.0221	0	0
0	0	0	0	0	0	0	0	0	0	0	0	0	0	0	0	0	0	0	0	0	0	0	0	0	0	0	0	0	0	0	0	0	0	0	0	0	0	0	0	0	0	0	0	0	0	0	0	0	0
0.0176	0.0221	0	0.339	0.0162	0.015	0.1099	0.016	0.0126	0.0118	0.1667	0.0098	0	0.0099	0.0088	0.0147	0	0.0974	0.0071	0.6667	0	0	0.0353	0	0	0	0	0.0065	0.0136	0	0	0	0	0	0.0196	0.2	0.0176	0.0126	0.232	0.0293	0.0441	0.0196	0.0071	0.2088	0.0294	0.0084	0.125	0.0221	0	0
0.0176	0.0221	0	0.339	0.0162	0.015	0.1099	0.016	0.0126	0.0118	0.1667	0.0098	0	0.0099	0.0088	0.0147	0	0.0974	0.0071	0.6667	0	0	0.0353	0	0	0	0	0.0065	0.0136	0	0	0	0	0	0.0196	0.2	0.0176	0.0126	0.232	0.0293	0.0441	0.0196	0.0071	0.2088	0.0294	0.0084	0.125	0.0221	0	0
0	0	0	0	0	0	0	0	0	0	0	0	0	0	0	0	0	0	0	0	0	0	0	0	0	0	0	0	0	0	0	0	0	0	0	0	0	0	0	0	0	0	0	0	0	0	0	0	0	0
0.3625	0.3326	0	0.1103	0.4782	0.4139	0.5394	0.3399	0.1529	0.2867	0.3617	0.3009	0.4211	0.3248	0.2922	0.3448	0.3258	0.2028	0.3327	0.0476	0	0.1931	0.6503	0.3859	0.3925	0	0.0303	0.4041	0.2726	0.3491	0.1773	0.3944	0.3988	0.2067	0.2119	0.3887	0.3421	0.3197	0.491	0.1905	0.463	0.4081	0.3424	0.3135	0.4068	0.3652	0.2172	0.3844	0.2838	0.1479
0	0	0	0	0	0	0	0	0	0	0	0	0	0	0	0	0	0	0	0	0	0	0	0	0	0	0	0	0	0	0	0	0	0	0	0	0	0	0	0	0	0	0	0	0	0	0	0	0	0
0.2927	0.5132	0	0.086	0.2317	0.3286	0.342	0.1867	0.1121	0.1542	0.2454	0.1001	0.1885	0.229	0.2647	0.3237	0.4242	0.1511	0.1608	0.0714	0	0.2684	0.4545	0.2374	0.4419	0	0.0384	0.237	0.2458	0.2904	0.0905	0.3649	0.4533	0.0949	0.1219	0.2822	0.1645	0.2629	0.3065	0.1318	0.4821	0.3002	0.169	0.2618	0.4123	0.1815	0.2103	0.3487	0.0133	0.1297
0.0922	0.0611	0	0.0283	0.1266	0.125	0.1923	0.1162	0.0753	0.1035	0.0352	0.0905	0.0624	0.1167	0.0676	0.0992	0.1889	0.1494	0.0962	0	0	0.0465	0.1244	0.0841	0.0256	0	0	0.092	0.1054	0.0235	0.0346	0.1113	0.0374	0.1971	0.0642	0.0558	0.1046	0.0912	0.0847	0.0394	0.0742	0.1399	0.0964	0.0823	0.0722	0.1081	0.0615	0.1182	0.0099	0.0326
0	0	0	0	0	0	0	0	0	0	0	0	0	0	0	0	0	0	0	0	0	0	0	0	0	0	0	0	0	0	0	0	0	0	0	0	0	0	0	0	0	0	0	0	0	0	0	0	0	0
0	0	0	0	0	0	0	0	0	0	0	0	0	0	0	0	0	0	0	0	0	0	0	0	0	0	0	0	0	0	0	0	0	0	0	0	0	0	0	0	0	0	0	0	0	0	0	0	0	0
0	0	0	0	0	0	0	0	0	0	0	0	0	0	0	0	0	0	0	0	0	0	0	0	0	0	0	0	0	0	0	0	0	0	0	0	0	0	0	0	0	0	0	0	0	0	0	0	0	0
0	0	0	0	0	0	0	0	0	0	0	0	0	0	0	0	0	0	0	0	0	0	0	0	0	0	0	0	0	0	0	0	0	0	0	0	0	0	0	0	0	0	0	0	0	0	0	0	0	0
0	0	0	0	0	0	0	0	0	0	0	0	0	0	0	0	0	0	0	0	0	0	0	0	0	0	0	0	0	0	0	0	0	0	0	0	0	0	0	0	0	0	0	0	0	0	0	0	0	0
0	0	0	0	0	0	0	0	0	0	0	0	0	0	0	0	0	0	0	0	0	0	0	0	0	0	0	0	0	0	0	0	0	0	0	0	0	0	0	0	0	0	0	0	0	0	0	0	0	0
0	0	0	0	0	0	0	0	0	0	0	0	0	0	0	0	0	0	0	0	0	0	0	0	0	0	0	0	0	0	0	0	0	0	0	0	0	0	0	0	0	0	0	0	0	0	0	0	0	0
0	0	0	0	0	0	0	0	0	0	0	0	0	0	0	0	0	0	0	0	0	0	0	0	0	0	0	0	0	0	0	0	0	0	0	0	0	0	0	0	0	0	0	0	0	0	0	0	0	0
0	0	0	0	0	0	0	0	0	0	0	0	0	0	0	0	0	0	0	0	0	0	0	0	0	0	0	0	0	0	0	0	0	0	0	0	0	0	0	0	0	0	0	0	0	0	0	0	0	0
0	0	0	0	0	0	0	0	0	0	0	0	0	0	0	0	0	0	0	0	0	0	0	0	0	0	0	0	0	0	0	0	0	0	0	0	0	0	0	0	0	0	0	0	0	0	0	0	0	0
0.0176	0.0221	0	0.339	0.0162	0.015	0.1099	0.016	0.0126	0.0118	0.1667	0.0098	0	0.0099	0.0088	0.0147	0	0.0974	0.0071	0.6667	0	0	0.0353	0	0	0	0	0.0065	0.0136	0	0	0	0	0	0.0196	0.2	0.0176	0.0126	0.232	0.0293	0.0441	0.0196	0.0071	0.2088	0.0294	0.0084	0.125	0.0221	0	0
0.27	0.2894	0	0.0757	0.2148	0.1997	0.1865	0.1239	0.0521	0.0898	0.2067	0.0721	0.1879	0.1642	0.2364	0.2864	0.3413	0.0469	0.1045	0.0714	0	0.1117	0.4679	0.2061	0.4383	0	0.0384	0.1581	0.1006	0.3733	0.1496	0.0921	0.421	0.1864	0.1336	0.2647	0.1498	0.1306	0.3711	0.1742	0.5838	0.308	0.0811	0.3184	0.3312	0.069	0.0976	0.0992	0.032	0.0491
0	0	0	0	0	0	0	0	0	0	0	0	0	0	0	0	0	0	0	0	0	0	0	0	0	0	0	0	0	0	0	0	0	0	0	0	0	0	0	0	0	0	0	0	0	0	0	0	0	0
0	0	0	0	0	0	0	0	0	0	0	0	0	0	0	0	0	0	0	0	0	0	0	0	0	0	0	0	0	0	0	0	0	0	0	0	0	0	0	0	0	0	0	0	0	0	0	0	0	0
0.5869	0.3282	0	0.1808	0.3407	0.2596	0.4287	0.5163	0.3839	0.5129	0.1056	0.222	0.2674	0.2957	0.3629	0.485	0.0739	0.3682	0.4098	0.0252	0	0.299	0.3826	0.3966	0.2224	0	0.0081	0.354	0.2866	0.4208	0.2989	0.243	0.2069	0.3735	0.7146	0.2825	0.673	0.5802	0.4648	0.3706	0.5349	0.4218	0.3625	0.5489	0.6433	0.3876	0.4215	0.6183	0.0502	0.1267
0.2228	0.2341	0	0.2722	0.247	0.2173	0.2748	0.0635	0.0287	0.05	0.3762	0.1893	0.2845	0.1552	0.2089	0.2541	0.2969	0.1424	0.1812	0.494	0	0.0281	0.3719	0.1903	0.3133	0	0.0503	0.1959	0.0766	0.2545	0.0288	0.0539	0.3075	0.0356	0.0516	0.4314	0.0695	0.0611	0.4223	0.058	0.3893	0.2253	0.1225	0.3715	0.3012	0.0981	0.2071	0.074	0.1064	0.0231
0	0	0	0	0	0	0	0	0	0	0	0	0	0	0	0	0	0	0	0	0	0	0	0	0	0	0	0	0	0	0	0	0	0	0	0	0	0	0	0	0	0	0	0	0	0	0	0	0	0
0.3748	0.5984	0	0.3113	0.3563	0.5928	0.4604	0.3039	0.3514	0.4484	0.3428	0.1994	0.2644	0.3623	0.3537	0.2841	0.3	0.2856	0.29	0.0357	0	0.5725	0.3586	0.4098	0.4208	0	0.0747	0.4092	0.4156	0.3618	0.3981	0.7155	0.6484	0.118	0.2633	0.2373	0.2048	0.3595	0.3084	0.3744	0.3226	0.5523	0.3657	0.3478	0.3234	0.3159	0.4526	0.4378	0.0146	0.2401
0.0176	0.0221	0	0.339	0.0162	0.015	0.1099	0.016	0.0126	0.0118	0.1667	0.0098	0	0.0099	0.0088	0.0147	0	0.0974	0.0071	0.6667	0	0	0.0353	0	0	0	0	0.0065	0.0136	0	0	0	0	0	0.0196	0.2	0.0176	0.0126	0.232	0.0293	0.0441	0.0196	0.0071	0.2088	0.0294	0.0084	0.125	0.0221	0	0
0	0	0	0	0	0	0	0	0	0	0	0	0	0	0	0	0	0	0	0	0	0	0	0	0	0	0	0	0	0	0	0	0	0	0	0	0	0	0	0	0	0	0	0	0	0	0	0	0	0
0.0176	0.0221	0	0.339	0.0162	0.015	0.1099	0.016	0.0126	0.0118	0.1667	0.0098	0	0.0099	0.0088	0.0147	0	0.0974	0.0071	0.6667	0	0	0.0353	0	0	0	0	0.0065	0.0136	0	0	0	0	0	0.0196	0.2	0.0176	0.0126	0.232	0.0293	0.0441	0.0196	0.0071	0.2088	0.0294	0.0084	0.125	0.0221	0	0
0	0	0	0	0	0	0	0	0	0	0	0	0	0	0	0	0	0	0	0	0	0	0	0	0	0	0	0	0	0	0	0	0	0	0	0	0	0	0	0	0	0	0	0	0	0	0	0	0	0
0	0	0	0	0	0	0	0	0	0	0	0	0	0	0	0	0	0	0	0	0	0	0	0	0	0	0	0	0	0	0	0	0	0	0	0	0	0	0	0	0	0	0	0	0	0	0	0	0	0
0	0	0	0	0	0	0	0	0	0	0	0	0	0	0	0	0	0	0	0	0	0	0	0	0	0	0	0	0	0	0	0	0	0	0	0	0	0	0	0	0	0	0	0	0	0	0	0	0	0
0	0	0	0	0	0	0	0	0	0	0	0	0	0	0	0	0	0	0	0	0	0	0	0	0	0	0	0	0	0	0	0	0	0	0	0	0	0	0	0	0	0	0	0	0	0	0	0	0	0
0	0	0	0	0	0	0	0	0	0	0	0	0	0	0	0	0	0	0	0	0	0	0	0	0	0	0	0	0	0	0	0	0	0	0	0	0	0	0	0	0	0	0	0	0	0	0	0	0	0
0.2408	0.2895	0	0.3439	0.2025	0.1955	0.182	0.1059	0.1775	0.1945	0.1825	0.0582	0.0599	0.1075	0.1306	0.0633	0.0273	0.1143	0.1294	0	0	0.2361	0.154	0.1824	0.0313	0	0.1361	0.1279	0.0731	0.0275	0.4146	0.3655	0.418	0.1124	0.0729	0.0244	0.1054	0.0911	0.0969	0.3119	0.095	0.3543	0.1353	0.2296	0.0861	0.0576	0.1577	0.1367	0.0126	0.04
0.2	0.25	0	0	0.1538	0.1429	0.1053	0	0	0	0.1869	0.0061	0.0978	0.1034	0.196	0.2472	0.4	0	0.0136	0.0953	0	0	0.4	0.1429	0.4	0	0.0513	0.0741	0.0374	0.2857	0	0	0.4	0	0	0.2243	0	0	0.2222	0	0.5	0.2222	0	0.2077	0.3333	0.0088	0.0143	0	0	0
0	0	0	0	0	0	0	0	0	0	0	0	0	0	0	0	0	0	0	0	0	0	0	0	0	0	0	0	0	0	0	0	0	0	0	0	0	0	0	0	0	0	0	0	0	0	0	0	0	0
0	0	0	0	0	0	0	0	0	0	0	0	0	0	0	0	0	0	0	0	0	0	0	0	0	0	0	0	0	0	0	0	0	0	0	0	0	0	0	0	0	0	0	0	0	0	0	0	0	0
0	0	0	0	0	0	0	0	0	0	0	0	0	0	0	0	0	0	0	0	0	0	0	0	0	0	0	0	0	0	0	0	0	0	0	0	0	0	0	0	0	0	0	0	0	0	0	0	0	0
0.0146	0	0	0.0381	0.1158	0.1076	0.0252	0.0274	0.0268	0.025	0.0251	0.0312	0.0228	0.0232	0	0	0.0978	0.0708	0.0096	0	0	0.0167	0	0.0105	0	0	0	0.0515	0	0	0	0	0	0.0416	0	0.0302	0	0	0	0	0	0	0.0557	0.0146	0	0.0288	0.0092	0	0.0571	0
0.2163	0.2382	0	0.0162	0.166	0.1545	0.1221	0.0687	0.0428	0.0388	0.1925	0.048	0.1348	0.1175	0.2061	0.251	0.3333	0.045	0.0651	0.0714	0	0.0237	0.3333	0.1656	0.3429	0	0.047	0.0908	0.0722	0.2754	0	0.0326	0.3429	0	0.0586	0.2039	0.0399	0.0583	0.2512	0.0072	0.4	0.2467	0.0241	0.2354	0.3348	0.0381	0.0451	0.0474	0	0
0.2	0.25	0	0	0.1538	0.1429	0.1053	0	0	0	0.1869	0.0061	0.0978	0.1034	0.196	0.2472	0.4	0	0.0136	0.0953	0	0	0.4	0.1429	0.4	0	0.0513	0.0741	0.0374	0.2857	0	0	0.4	0	0	0.2243	0	0	0.2222	0	0.5	0.2222	0	0.2077	0.3333	0.0088	0.0143	0	0	0
0	0	0	0	0	0	0	0	0	0	0	0	0	0	0	0	0	0	0	0	0	0	0	0	0	0	0	0	0	0	0	0	0	0	0	0	0	0	0	0	0	0	0	0	0	0	0	0	0	0
0.2	0.25	0	0	0.1538	0.1429	0.1053	0	0	0	0.1869	0.0061	0.0978	0.1034	0.196	0.2472	0.4	0	0.0136	0.0953	0	0	0.4	0.1429	0.4	0	0.0513	0.0741	0.0374	0.2857	0	0	0.4	0	0	0.2243	0	0	0.2222	0	0.5	0.2222	0	0.2077	0.3333	0.0088	0.0143	0	0	0
0.2	0.25	0	0	0.1538	0.1429	0.1053	0	0	0	0.1869	0.0061	0.0978	0.1034	0.196	0.2472	0.4	0	0.0136	0.0953	0	0	0.4	0.1429	0.4	0	0.0513	0.0741	0.0374	0.2857	0	0	0.4	0	0	0.2243	0	0	0.2222	0	0.5	0.2222	0	0.2077	0.3333	0.0088	0.0143	0	0	0
0	0	0	0	0	0	0	0	0	0	0	0	0	0	0	0	0	0	0	0	0	0	0	0	0	0	0	0	0	0	0	0	0	0	0	0	0	0	0	0	0	0	0	0	0	0	0	0	0	0
0	0	0	0	0	0	0	0	0	0	0	0	0	0	0	0	0	0	0	0	0	0	0	0	0	0	0	0	0	0	0	0	0	0	0	0	0	0	0	0	0	0	0	0	0	0	0	0	0	0
0	0	0	0	0	0	0	0	0	0	0	0	0	0	0	0	0	0	0	0	0	0	0	0	0	0	0	0	0	0	0	0	0	0	0	0	0	0	0	0	0	0	0	0	0	0	0	0	0	0
0.0176	0.0221	0	0.339	0.0162	0.015	0.1099	0.016	0.0126	0.0118	0.1667	0.0098	0	0.0099	0.0088	0.0147	0	0.0974	0.0071	0.6667	0	0	0.0353	0	0	0	0	0.0065	0.0136	0	0	0	0	0	0.0196	0.2	0.0176	0.0126	0.232	0.0293	0.0441	0.0196	0.0071	0.2088	0.0294	0.0084	0.125	0.0221	0	0
0	0	0	0	0	0	0	0	0	0	0	0	0	0	0	0	0	0	0	0	0	0	0	0	0	0	0	0	0	0	0	0	0	0	0	0	0	0	0	0	0	0	0	0	0	0	0	0	0	0
0	0	0	0	0	0	0	0	0	0	0	0	0	0	0	0	0	0	0	0	0	0	0	0	0	0	0	0	0	0	0	0	0	0	0	0	0	0	0	0	0	0	0	0	0	0	0	0	0	0
0	0	0	0	0	0	0	0	0	0	0	0	0	0	0	0	0	0	0	0	0	0	0	0	0	0	0	0	0	0	0	0	0	0	0	0	0	0	0	0	0	0	0	0	0	0	0	0	0	0
0	0	0	0	0	0	0	0	0	0	0	0	0	0	0	0	0	0	0	0	0	0	0	0	0	0	0	0	0	0	0	0	0	0	0	0	0	0	0	0	0	0	0	0	0	0	0	0	0	0
0	0	0	0	0	0	0	0	0	0	0	0	0	0	0	0	0	0	0	0	0	0	0	0	0	0	0	0	0	0	0	0	0	0	0	0	0	0	0	0	0	0	0	0	0	0	0	0	0	0
0	0	0	0	0	0	0	0	0	0	0	0	0	0	0	0	0	0	0	0	0	0	0	0	0	0	0	0	0	0	0	0	0	0	0	0	0	0	0	0	0	0	0	0	0	0	0	0	0	0
0	0	0	0	0	0	0	0	0	0	0	0	0	0	0	0	0	0	0	0	0	0	0	0	0	0	0	0	0	0	0	0	0	0	0	0	0	0	0	0	0	0	0	0	0	0	0	0	0	0
0.3289	0.2872	0	0.129	0.4088	0.4354	0.4069	0.4661	0.2882	0.3877	0.4138	0.3152	0.3939	0.3978	0.2215	0.2591	0.2372	0.226	0.432	0.0196	0	0.3957	0.4893	0.4348	0.2308	0	0.0036	0.4655	0.4209	0.2005	0.2867	0.4551	0.1993	0.2076	0.3001	0.214	0.4019	0.403	0.3951	0.2438	0.314	0.3226	0.4523	0.2491	0.3017	0.4362	0.3171	0.5166	0.301	0.4762
0	0	0	0	0	0	0	0	0	0	0	0	0	0	0	0	0	0	0	0	0	0	0	0	0	0	0	0	0	0	0	0	0	0	0	0	0	0	0	0	0	0	0	0	0	0	0	0	0	0
0	0	0	0	0	0	0	0	0	0	0	0	0	0	0	0	0	0	0	0	0	0	0	0	0	0	0	0	0	0	0	0	0	0	0	0	0	0	0	0	0	0	0	0	0	0	0	0	0	0
0	0	0	0	0	0	0	0	0	0	0	0	0	0	0	0	0	0	0	0	0	0	0	0	0	0	0	0	0	0	0	0	0	0	0	0	0	0	0	0	0	0	0	0	0	0	0	0	0	0
0	0	0	0	0	0	0	0	0	0	0	0	0	0	0	0	0	0	0	0	0	0	0	0	0	0	0	0	0	0	0	0	0	0	0	0	0	0	0	0	0	0	0	0	0	0	0	0	0	0
0	0	0	0	0	0	0	0	0	0	0	0	0	0	0	0	0	0	0	0	0	0	0	0	0	0	0	0	0	0	0	0	0	0	0	0	0	0	0	0	0	0	0	0	0	0	0	0	0	0
0	0	0	0	0	0	0	0	0	0	0	0	0	0	0	0	0	0	0	0	0	0	0	0	0	0	0	0	0	0	0	0	0	0	0	0	0	0	0	0	0	0	0	0	0	0	0	0	0	0
0	0	0	0	0	0	0	0	0	0	0	0	0	0	0	0	0	0	0	0	0	0	0	0	0	0	0	0	0	0	0	0	0	0	0	0	0	0	0	0	0	0	0	0	0	0	0	0	0	0
0	0	0	0	0	0	0	0	0	0	0	0	0	0	0	0	0	0	0	0	0	0	0	0	0	0	0	0	0	0	0	0	0	0	0	0	0	0	0	0	0	0	0	0	0	0	0	0	0	0
0	0	0	0	0	0	0	0	0	0	0	0	0	0	0	0	0	0	0	0	0	0	0	0	0	0	0	0	0	0	0	0	0	0	0	0	0	0	0	0	0	0	0	0	0	0	0	0	0	0
0.3167	0.0626	0	0.0323	0.1308	0.2226	0.2143	0.1395	0.175	0.2177	0.0379	0.1685	0.1369	0.1679	0.0883	0.1295	0.0488	0.1531	0.1932	0	0	0.0566	0.1764	0.318	0.0379	0	0	0.1917	0.2066	0.0511	0.0536	0.1483	0.0408	0.1921	0.0837	0.2163	0.1458	0.1228	0.1252	0.0545	0.0897	0.1424	0.1968	0.226	0.0882	0.1967	0.1805	0.1592	0.034	0.0428
0	0	0	0	0	0	0	0	0	0	0	0	0	0	0	0	0	0	0	0	0	0	0	0	0	0	0	0	0	0	0	0	0	0	0	0	0	0	0	0	0	0	0	0	0	0	0	0	0	0
0	0	0	0	0	0	0	0	0	0	0	0	0	0	0	0	0	0	0	0	0	0	0	0	0	0	0	0	0	0	0	0	0	0	0	0	0	0	0	0	0	0	0	0	0	0	0	0	0	0
0.2	0.25	0	0	0.1538	0.1429	0.1053	0	0	0	0.1869	0.0061	0.0978	0.1034	0.196	0.2472	0.4	0	0.0136	0.0953	0	0	0.4	0.1429	0.4	0	0.0513	0.0741	0.0374	0.2857	0	0	0.4	0	0	0.2243	0	0	0.2222	0	0.5	0.2222	0	0.2077	0.3333	0.0088	0.0143	0	0	0
0.2	0.25	0	0	0.1538	0.1429	0.1053	0	0	0	0.1869	0.0061	0.0978	0.1034	0.196	0.2472	0.4	0	0.0136	0.0953	0	0	0.4	0.1429	0.4	0	0.0513	0.0741	0.0374	0.2857	0	0	0.4	0	0	0.2243	0	0	0.2222	0	0.5	0.2222	0	0.2077	0.3333	0.0088	0.0143	0	0	0
0.2	0.25	0	0	0.1538	0.1429	0.1053	0	0	0	0.1869	0.0061	0.0978	0.1034	0.196	0.2472	0.4	0	0.0136	0.0953	0	0	0.4	0.1429	0.4	0	0.0513	0.0741	0.0374	0.2857	0	0	0.4	0	0	0.2243	0	0	0.2222	0	0.5	0.2222	0	0.2077	0.3333	0.0088	0.0143	0	0	0
0.2	0.25	0	0	0.1538	0.1429	0.1053	0	0	0	0.1869	0.0061	0.0978	0.1034	0.196	0.2472	0.4	0	0.0136	0.0953	0	0	0.4	0.1429	0.4	0	0.0513	0.0741	0.0374	0.2857	0	0	0.4	0	0	0.2243	0	0	0.2222	0	0.5	0.2222	0	0.2077	0.3333	0.0088	0.0143	0	0	0
0.2	0.25	0	0	0.1538	0.1429	0.1053	0	0	0	0.1869	0.0061	0.0978	0.1034	0.196	0.2472	0.4	0	0.0136	0.0953	0	0	0.4	0.1429	0.4	0	0.0513	0.0741	0.0374	0.2857	0	0	0.4	0	0	0.2243	0	0	0.2222	0	0.5	0.2222	0	0.2077	0.3333	0.0088	0.0143	0	0	0
0.2	0	0	0	0.0103	0.0095	0.0067	0.0075	0.1458	0.1361	0.0069	0.0071	0.0061	0.0515	0.0158	0.0263	0.0364	0.1012	0.0819	0	0	0	0	0.1429	0	0	0	0.0049	0	0	0	0	0	0	0	0.2	0	0	0	0	0	0	0.0053	0.2	0	0.0983	0.125	0	0	0
0.0176	0.0221	0	0.339	0.0162	0.015	0.1099	0.016	0.0126	0.0118	0.1667	0.0098	0	0.0099	0.0088	0.0147	0	0.0974	0.0071	0.6667	0	0	0.0353	0	0	0	0	0.0065	0.0136	0	0	0	0	0	0.0196	0.2	0.0176	0.0126	0.232	0.0293	0.0441	0.0196	0.0071	0.2088	0.0294	0.0084	0.125	0.0221	0	0
0.2249	0.0677	0	0.3327	0.202	0.2124	0.2362	0.1487	0.0631	0.117	0.2032	0.3293	0.225	0.1442	0.0593	0.0757	0.0196	0.2513	0.1667	0.4	0	0.2517	0.1858	0.1591	0.0854	0	0	0.2228	0.1526	0.0908	0.0905	0.1385	0.0659	0.4419	0.1188	0.3051	0.1602	0.1473	0.3278	0.131	0.1185	0.1016	0.2143	0.2518	0.1013	0.1312	0.2446	0.1624	0.1126	0.0715
0	0	0	0	0	0	0	0	0	0	0	0	0	0	0	0	0	0	0	0	0	0	0	0	0	0	0	0	0	0	0	0	0	0	0	0	0	0	0	0	0	0	0	0	0	0	0	0	0	0
0.0182	0.2629	0	0.0558	0.0187	0.0221	0.018	0.0074	0.0454	0.0448	0.0128	0.066	0	0.0156	0.1045	0	0.013	0.0417	0.0067	0	0	0.028	0	0.0401	0.0079	0	0	0.0111	0.0675	0.0779	0.0079	0.0212	0.0066	0	0	0.0214	0.09	0.069	0.0898	0.0288	0	0	0.012	0	0	0.019	0.0213	0.0164	0	0.017
0	0	0	0	0	0	0	0	0	0	0	0	0	0	0	0	0	0	0	0	0	0	0	0	0	0	0	0	0	0	0	0	0	0	0	0	0	0	0	0	0	0	0	0	0	0	0	0	0	0
0	0	0	0	0	0	0	0	0	0	0	0	0	0	0	0	0	0	0	0	0	0	0	0	0	0	0	0	0	0	0	0	0	0	0	0	0	0	0	0	0	0	0	0	0	0	0	0	0	0
0	0	0	0	0	0	0	0	0	0	0	0	0	0	0	0	0	0	0	0	0	0	0	0	0	0	0	0	0	0	0	0	0	0	0	0	0	0	0	0	0	0	0	0	0	0	0	0	0	0
0.2408	0.2895	0	0.3439	0.2025	0.1955	0.182	0.1059	0.1775	0.1945	0.1825	0.0582	0.0599	0.1075	0.1306	0.0633	0.0273	0.1143	0.1294	0	0	0.2361	0.154	0.1824	0.0313	0	0.1361	0.1279	0.0731	0.0275	0.4146	0.3655	0.418	0.1124	0.0729	0.0244	0.1054	0.0911	0.0969	0.3119	0.095	0.3543	0.1353	0.2296	0.0861	0.0576	0.1577	0.1367	0.0126	0.04
0	0	0	0	0	0	0	0	0	0	0	0	0	0	0	0	0	0	0	0	0	0	0	0	0	0	0	0	0	0	0	0	0	0	0	0	0	0	0	0	0	0	0	0	0	0	0	0	0	0
0	0	0	0	0	0	0	0	0	0	0	0	0	0	0	0	0	0	0	0	0	0	0	0	0	0	0	0	0	0	0	0	0	0	0	0	0	0	0	0	0	0	0	0	0	0	0	0	0	0
0	0	0	0	0	0	0	0	0	0	0	0	0	0	0	0	0	0	0	0	0	0	0	0	0	0	0	0	0	0	0	0	0	0	0	0	0	0	0	0	0	0	0	0	0	0	0	0	0	0
0.2	0.25	0	0	0.1538	0.1429	0.1053	0	0	0	0.1869	0.0061	0.0978	0.1034	0.196	0.2472	0.4	0	0.0136	0.0953	0	0	0.4	0.1429	0.4	0	0.0513	0.0741	0.0374	0.2857	0	0	0.4	0	0	0.2243	0	0	0.2222	0	0.5	0.2222	0	0.2077	0.3333	0.0088	0.0143	0	0	0
0.2453	0.0753	0	0.3506	0.1981	0.2095	0.248	0.1611	0.0673	0.1243	0.2188	0.2413	0.2352	0.1	0.0621	0.0815	0.0228	0.1794	0.1636	0.5	0	0.0928	0.2167	0.1697	0.0996	0	0	0.2272	0.1635	0.1022	0.1055	0.1558	0.0769	0.1303	0.1307	0.3141	0.1748	0.1571	0.3606	0.1474	0.1422	0.1118	0.2187	0.2747	0.1157	0.1372	0.259	0.1805	0.0938	0.0834
0.261	0.0736	0	0.0701	0.2039	0.2157	0.1558	0.1678	0.0658	0.1267	0.0704	0.2498	0.2464	0.0958	0.0608	0.0809	0.0274	0.0932	0.1666	0	0	0.1021	0.2424	0.1819	0.1195	0	0	0.2323	0.1693	0.1168	0.1267	0.1781	0.0922	0.1628	0.1354	0.1455	0.1835	0.162	0.1784	0.1391	0.1557	0.1144	0.224	0.1021	0.1203	0.1395	0.1501	0.192	0.1172	0.1001
0	0	0	0	0	0	0	0	0	0	0	0	0	0	0	0	0	0	0	0	0	0	0	0	0	0	0	0	0	0	0	0	0	0	0	0	0	0	0	0	0	0	0	0	0	0	0	0	0	0
0	0	0	0	0	0	0	0	0	0	0	0	0	0	0	0	0	0	0	0	0	0	0	0	0	0	0	0	0	0	0	0	0	0	0	0	0	0	0	0	0	0	0	0	0	0	0	0	0	0
0	0	0	0	0	0	0	0	0	0	0	0	0	0	0	0	0	0	0	0	0	0	0	0	0	0	0	0	0	0	0	0	0	0	0	0	0	0	0	0	0	0	0	0	0	0	0	0	0	0
0	0	0	0	0	0	0	0	0	0	0	0	0	0	0	0	0	0	0	0	0	0	0	0	0	0	0	0	0	0	0	0	0	0	0	0	0	0	0	0	0	0	0	0	0	0	0	0	0	0
0	0	0	0	0	0	0	0	0	0	0	0	0	0	0	0	0	0	0	0	0	0	0	0	0	0	0	0	0	0	0	0	0	0	0	0	0	0	0	0	0	0	0	0	0	0	0	0	0	0
0	0	0	0	0	0	0	0	0	0	0	0	0	0	0	0	0	0	0	0	0	0	0	0	0	0	0	0	0	0	0	0	0	0	0	0	0	0	0	0	0	0	0	0	0	0	0	0	0	0
0	0	0	0	0	0	0	0	0	0	0	0	0	0	0	0	0	0	0	0	0	0	0	0	0	0	0	0	0	0	0	0	0	0	0	0	0	0	0	0	0	0	0	0	0	0	0	0	0	0
0	0	0	0	0	0	0	0	0	0	0	0	0	0	0	0	0	0	0	0	0	0	0	0	0	0	0	0	0	0	0	0	0	0	0	0	0	0	0	0	0	0	0	0	0	0	0	0	0	0
0	0	0	0	0	0	0	0	0	0	0	0	0	0	0	0	0	0	0	0	0	0	0	0	0	0	0	0	0	0	0	0	0	0	0	0	0	0	0	0	0	0	0	0	0	0	0	0	0	0
0.2	0	0	0	0.0103	0.0095	0.0067	0.0075	0.1458	0.1361	0.0069	0.0071	0.0061	0.0515	0.0158	0.0263	0.0364	0.1012	0.0819	0	0	0	0	0.1429	0	0	0	0.0049	0	0	0	0	0	0	0	0.2	0	0	0	0	0	0	0.0053	0.2	0	0.0983	0.125	0	0	0
0	0	0	0	0	0	0	0	0	0	0	0	0	0	0	0	0	0	0	0	0	0	0	0	0	0	0	0	0	0	0	0	0	0	0	0	0	0	0	0	0	0	0	0	0	0	0	0	0	0
0	0	0	0	0	0	0	0	0	0	0	0	0	0	0	0	0	0	0	0	0	0	0	0	0	0	0	0	0	0	0	0	0	0	0	0	0	0	0	0	0	0	0	0	0	0	0	0	0	0
0	0	0	0	0	0	0	0	0	0	0	0	0	0	0	0	0	0	0	0	0	0	0	0	0	0	0	0	0	0	0	0	0	0	0	0	0	0	0	0	0	0	0	0	0	0	0	0	0	0
0.0176	0.0221	0	0.339	0.0162	0.015	0.1099	0.016	0.0126	0.0118	0.1667	0.0098	0	0.0099	0.0088	0.0147	0	0.0974	0.0071	0.6667	0	0	0.0353	0	0	0	0	0.0065	0.0136	0	0	0	0	0	0.0196	0.2	0.0176	0.0126	0.232	0.0293	0.0441	0.0196	0.0071	0.2088	0.0294	0.0084	0.125	0.0221	0	0
0.0176	0.0221	0	0.339	0.0162	0.015	0.1099	0.016	0.0126	0.0118	0.1667	0.0098	0	0.0099	0.0088	0.0147	0	0.0974	0.0071	0.6667	0	0	0.0353	0	0	0	0	0.0065	0.0136	0	0	0	0	0	0.0196	0.2	0.0176	0.0126	0.232	0.0293	0.0441	0.0196	0.0071	0.2088	0.0294	0.0084	0.125	0.0221	0	0
0.0176	0.0221	0	0.339	0.0162	0.015	0.1099	0.016	0.0126	0.0118	0.1667	0.0098	0	0.0099	0.0088	0.0147	0	0.0974	0.0071	0.6667	0	0	0.0353	0	0	0	0	0.0065	0.0136	0	0	0	0	0	0.0196	0.2	0.0176	0.0126	0.232	0.0293	0.0441	0.0196	0.0071	0.2088	0.0294	0.0084	0.125	0.0221	0	0
0.0176	0.0221	0	0.339	0.0162	0.015	0.1099	0.016	0.0126	0.0118	0.1667	0.0098	0	0.0099	0.0088	0.0147	0	0.0974	0.0071	0.6667	0	0	0.0353	0	0	0	0	0.0065	0.0136	0	0	0	0	0	0.0196	0.2	0.0176	0.0126	0.232	0.0293	0.0441	0.0196	0.0071	0.2088	0.0294	0.0084	0.125	0.0221	0	0
0	0	0	0	0	0	0	0	0	0	0	0	0	0	0	0	0	0	0	0	0	0	0	0	0	0	0	0	0	0	0	0	0	0	0	0	0	0	0	0	0	0	0	0	0	0	0	0	0	0
0.0176	0.0221	0	0.339	0.0162	0.015	0.1099	0.016	0.0126	0.0118	0.1667	0.0098	0	0.0099	0.0088	0.0147	0	0.0974	0.0071	0.6667	0	0	0.0353	0	0	0	0	0.0065	0.0136	0	0	0	0	0	0.0196	0.2	0.0176	0.0126	0.232	0.0293	0.0441	0.0196	0.0071	0.2088	0.0294	0.0084	0.125	0.0221	0	0
0.0786	0.1229	0	0.3534	0.0774	0.1095	0.2426	0.2609	0.1121	0.1294	0.3221	0.0678	0.0557	0.1265	0.0531	0.0638	0.3333	0.1462	0.0806	0.5	0	0.265	0.1391	0.0809	0.116	0	0	0.155	0.1152	0.0302	0.1213	0.3727	0.1181	0.0875	0.073	0.3844	0.1154	0.1295	0.2879	0.1456	0.0919	0.0939	0.1643	0.23	0.0848	0.1617	0.2985	0.332	0.0099	0.3889
0.0176	0.0221	0	0.339	0.0162	0.015	0.1099	0.016	0.0126	0.0118	0.1667	0.0098	0	0.0099	0.0088	0.0147	0	0.0974	0.0071	0.6667	0	0	0.0353	0	0	0	0	0.0065	0.0136	0	0	0	0	0	0.0196	0.2	0.0176	0.0126	0.232	0.0293	0.0441	0.0196	0.0071	0.2088	0.0294	0.0084	0.125	0.0221	0	0
0.0176	0.0221	0	0.339	0.0162	0.015	0.1099	0.016	0.0126	0.0118	0.1667	0.0098	0	0.0099	0.0088	0.0147	0	0.0974	0.0071	0.6667	0	0	0.0353	0	0	0	0	0.0065	0.0136	0	0	0	0	0	0.0196	0.2	0.0176	0.0126	0.232	0.0293	0.0441	0.0196	0.0071	0.2088	0.0294	0.0084	0.125	0.0221	0	0
0	0	0	0	0	0	0	0	0	0	0	0	0	0	0	0	0	0	0	0	0	0	0	0	0	0	0	0	0	0	0	0	0	0	0	0	0	0	0	0	0	0	0	0	0	0	0	0	0	0
0	0	0	0	0	0	0	0	0	0	0	0	0	0	0	0	0	0	0	0	0	0	0	0	0	0	0	0	0	0	0	0	0	0	0	0	0	0	0	0	0	0	0	0	0	0	0	0	0	0
0	0	0	0	0	0	0	0	0	0	0	0	0	0	0	0	0	0	0	0	0	0	0	0	0	0	0	0	0	0	0	0	0	0	0	0	0	0	0	0	0	0	0	0	0	0	0	0	0	0
0	0	0	0	0	0	0	0	0	0	0	0	0	0	0	0	0	0	0	0	0	0	0	0	0	0	0	0	0	0	0	0	0	0	0	0	0	0	0	0	0	0	0	0	0	0	0	0	0	0
0	0	0	0	0	0	0	0	0	0	0	0	0	0	0	0	0	0	0	0	0	0	0	0	0	0	0	0	0	0	0	0	0	0	0	0	0	0	0	0	0	0	0	0	0	0	0	0	0	0
0	0	0	0	0	0	0	0	0	0	0	0	0	0	0	0	0	0	0	0	0	0	0	0	0	0	0	0	0	0	0	0	0	0	0	0	0	0	0	0	0	0	0	0	0	0	0	0	0	0
0.06	0.0334	0	0.0286	0.1251	0.0998	0.094	0.0634	0.0236	0.0482	0.0924	0.2218	0.2375	0.0664	0.0548	0.0642	0.0265	0.06	0.1692	0.1091	0	0.0337	0.106	0.0785	0.0496	0	0.0577	0.1336	0.0436	0.0493	0.0403	0.0694	0.0415	0.0534	0.0489	0.1019	0.0706	0.0607	0.0733	0.0452	0.0655	0.045	0.1272	0.0472	0.056	0.097	0.1008	0.0765	0.1595	0.0323
0	0	0	0	0	0	0	0	0	0	0	0	0	0	0	0	0	0	0	0	0	0	0	0	0	0	0	0	0	0	0	0	0	0	0	0	0	0	0	0	0	0	0	0	0	0	0	0	0	0
0	0	0	0	0	0	0	0	0	0	0	0	0	0	0	0	0	0	0	0	0	0	0	0	0	0	0	0	0	0	0	0	0	0	0	0	0	0	0	0	0	0	0	0	0	0	0	0	0	0
0	0	0	0	0	0	0	0	0	0	0	0	0	0	0	0	0	0	0	0	0	0	0	0	0	0	0	0	0	0	0	0	0	0	0	0	0	0	0	0	0	0	0	0	0	0	0	0	0	0
0	0	0	0	0	0	0	0	0	0	0	0	0	0	0	0	0	0	0	0	0	0	0	0	0	0	0	0	0	0	0	0	0	0	0	0	0	0	0	0	0	0	0	0	0	0	0	0	0	0
0.0639	0.0687	0	0.033	0.074	0.076	0.1946	0.1145	0.0511	0.0827	0.0268	0.0872	0.0583	0.1075	0.071	0.1074	0.0267	0.0476	0.0811	0	0	0.0512	0.1493	0.0633	0.0307	0	0	0.0654	0.1135	0.0269	0.0416	0.1272	0.0449	0.2463	0.0713	0.0238	0.1151	0.0977	0.0941	0.0451	0.0928	0.1554	0.0679	0.053	0.0842	0.0883	0.0419	0.133	0.0123	0.0391
0	0	0	0	0	0	0	0	0	0	0	0	0	0	0	0	0	0	0	0	0	0	0	0	0	0	0	0	0	0	0	0	0	0	0	0	0	0	0	0	0	0	0	0	0	0	0	0	0	0
0	0	0	0	0	0	0	0	0	0	0	0	0	0	0	0	0	0	0	0	0	0	0	0	0	0	0	0	0	0	0	0	0	0	0	0	0	0	0	0	0	0	0	0	0	0	0	0	0	0
0	0	0	0	0	0	0	0	0	0	0	0	0	0	0	0	0	0	0	0	0	0	0	0	0	0	0	0	0	0	0	0	0	0	0	0	0	0	0	0	0	0	0	0	0	0	0	0	0	0
0	0	0	0	0	0	0	0	0	0	0	0	0	0	0	0	0	0	0	0	0	0	0	0	0	0	0	0	0	0	0	0	0	0	0	0	0	0	0	0	0	0	0	0	0	0	0	0	0	0
0	0	0	0	0	0	0	0	0	0	0	0	0	0	0	0	0	0	0	0	0	0	0	0	0	0	0	0	0	0	0	0	0	0	0	0	0	0	0	0	0	0	0	0	0	0	0	0	0	0
0	0	0	0	0	0	0	0	0	0	0	0	0	0	0	0	0	0	0	0	0	0	0	0	0	0	0	0	0	0	0	0	0	0	0	0	0	0	0	0	0	0	0	0	0	0	0	0	0	0
0	0	0	0	0	0	0	0	0	0	0	0	0	0	0	0	0	0	0	0	0	0	0	0	0	0	0	0	0	0	0	0	0	0	0	0	0	0	0	0	0	0	0	0	0	0	0	0	0	0
0.0952	0.0665	0	0.0558	0.0909	0.1998	0.0977	0.1354	0.0871	0.2184	0.0397	0.1567	0.156	0.0988	0.0572	0.0752	0.0258	0.1251	0.0817	0	0	0.2345	0.1429	0.0899	0.0298	0	0.0235	0.1367	0.2171	0.2939	0.0402	0.3608	0.0434	0.105	0.3113	0.0231	0.1253	0.1139	0.1047	0.0436	0.0897	0.3053	0.1495	0.0687	0.1413	0.1372	0.1731	0.356	0.0119	0.0379
0	0	0	0	0	0	0	0	0	0	0	0	0	0	0	0	0	0	0	0	0	0	0	0	0	0	0	0	0	0	0	0	0	0	0	0	0	0	0	0	0	0	0	0	0	0	0	0	0	0
0	0	0	0	0	0	0	0	0	0	0	0	0	0	0	0	0	0	0	0	0	0	0	0	0	0	0	0	0	0	0	0	0	0	0	0	0	0	0	0	0	0	0	0	0	0	0	0	0	0
0	0	0	0	0	0	0	0	0	0	0	0	0	0	0	0	0	0	0	0	0	0	0	0	0	0	0	0	0	0	0	0	0	0	0	0	0	0	0	0	0	0	0	0	0	0	0	0	0	0
0	0	0	0	0	0	0	0	0	0	0	0	0	0	0	0	0	0	0	0	0	0	0	0	0	0	0	0	0	0	0	0	0	0	0	0	0	0	0	0	0	0	0	0	0	0	0	0	0	0
0	0	0	0	0	0	0	0	0	0	0	0	0	0	0	0	0	0	0	0	0	0	0	0	0	0	0	0	0	0	0	0	0	0	0	0	0	0	0	0	0	0	0	0	0	0	0	0	0	0
0	0	0	0	0	0	0	0	0	0	0	0	0	0	0	0	0	0	0	0	0	0	0	0	0	0	0	0	0	0	0	0	0	0	0	0	0	0	0	0	0	0	0	0	0	0	0	0	0	0
0	0	0	0	0	0	0	0	0	0	0	0	0	0	0	0	0	0	0	0	0	0	0	0	0	0	0	0	0	0	0	0	0	0	0	0	0	0	0	0	0	0	0	0	0	0	0	0	0	0
0	0	0	0	0	0	0	0	0	0	0	0	0	0	0	0	0	0	0	0	0	0	0	0	0	0	0	0	0	0	0	0	0	0	0	0	0	0	0	0	0	0	0	0	0	0	0	0	0	0
0	0	0	0	0	0	0	0	0	0	0	0	0	0	0	0	0	0	0	0	0	0	0	0	0	0	0	0	0	0	0	0	0	0	0	0	0	0	0	0	0	0	0	0	0	0	0	0	0	0
0	0	0	0	0	0	0	0	0	0	0	0	0	0	0	0	0	0	0	0	0	0	0	0	0	0	0	0	0	0	0	0	0	0	0	0	0	0	0	0	0	0	0	0	0	0	0	0	0	0
0	0	0	0	0	0	0	0	0	0	0	0	0	0	0	0	0	0	0	0	0	0	0	0	0	0	0	0	0	0	0	0	0	0	0	0	0	0	0	0	0	0	0	0	0	0	0	0	0	0
0	0	0	0	0	0	0	0	0	0	0	0	0	0	0	0	0	0	0	0	0	0	0	0	0	0	0	0	0	0	0	0	0	0	0	0	0	0	0	0	0	0	0	0	0	0	0	0	0	0
0	0	0	0	0	0	0	0	0	0	0	0	0	0	0	0	0	0	0	0	0	0	0	0	0	0	0	0	0	0	0	0	0	0	0	0	0	0	0	0	0	0	0	0	0	0	0	0	0	0
0	0	0	0	0	0	0	0	0	0	0	0	0	0	0	0	0	0	0	0	0	0	0	0	0	0	0	0	0	0	0	0	0	0	0	0	0	0	0	0	0	0	0	0	0	0	0	0	0	0
0	0	0	0	0	0	0	0	0	0	0	0	0	0	0	0	0	0	0	0	0	0	0	0	0	0	0	0	0	0	0	0	0	0	0	0	0	0	0	0	0	0	0	0	0	0	0	0	0	0
0	0	0	0	0	0	0	0	0	0	0	0	0	0	0	0	0	0	0	0	0	0	0	0	0	0	0	0	0	0	0	0	0	0	0	0	0	0	0	0	0	0	0	0	0	0	0	0	0	0
0	0	0	0	0	0	0	0	0	0	0	0	0	0	0	0	0	0	0	0	0	0	0	0	0	0	0	0	0	0	0	0	0	0	0	0	0	0	0	0	0	0	0	0	0	0	0	0	0	0
0	0	0	0	0	0	0	0	0	0	0	0	0	0	0	0	0	0	0	0	0	0	0	0	0	0	0	0	0	0	0	0	0	0	0	0	0	0	0	0	0	0	0	0	0	0	0	0	0	0
0	0	0	0	0	0	0	0	0	0	0	0	0	0	0	0	0	0	0	0	0	0	0	0	0	0	0	0	0	0	0	0	0	0	0	0	0	0	0	0	0	0	0	0	0	0	0	0	0	0
0	0	0	0	0	0	0	0	0	0	0	0	0	0	0	0	0	0	0	0	0	0	0	0	0	0	0	0	0	0	0	0	0	0	0	0	0	0	0	0	0	0	0	0	0	0	0	0	0	0
0	0	0	0	0	0	0	0	0	0	0	0	0	0	0	0	0	0	0	0	0	0	0	0	0	0	0	0	0	0	0	0	0	0	0	0	0	0	0	0	0	0	0	0	0	0	0	0	0	0
0	0	0	0	0	0	0	0	0	0	0	0	0	0	0	0	0	0	0	0	0	0	0	0	0	0	0	0	0	0	0	0	0	0	0	0	0	0	0	0	0	0	0	0	0	0	0	0	0	0
0	0	0	0	0	0	0	0	0	0	0	0	0	0	0	0	0	0	0	0	0	0	0	0	0	0	0	0	0	0	0	0	0	0	0	0	0	0	0	0	0	0	0	0	0	0	0	0	0	0
0	0	0	0	0	0	0	0	0	0	0	0	0	0	0	0	0	0	0	0	0	0	0	0	0	0	0	0	0	0	0	0	0	0	0	0	0	0	0	0	0	0	0	0	0	0	0	0	0	0
0	0	0	0	0	0	0	0	0	0	0	0	0	0	0	0	0	0	0	0	0	0	0	0	0	0	0	0	0	0	0	0	0	0	0	0	0	0	0	0	0	0	0	0	0	0	0	0	0	0
0	0	0	0	0	0	0	0	0	0	0	0	0	0	0	0	0	0	0	0	0	0	0	0	0	0	0	0	0	0	0	0	0	0	0	0	0	0	0	0	0	0	0	0	0	0	0	0	0	0
[truncated: 445 more columns]
