# Supplementary material for: PBMDA: A novel and effective path-based computational model for miRNA-disease association prediction
Source: PLoS Comput Biol. 2017 Mar 24;13(3):e1005455. doi: 10.1371/journal.pcbi.1005455 (PMC5384769; doi:10.1371/journal.pcbi.1005455)
Supplement: S5 Table — (XLSX) [file pcbi.1005455.s005.xlsx]

## Sheet: Prostate Neoplasms
Prostate Neoplasms	hsa-mir-21	miR2Disease;dbDEMC
Prostate Neoplasms	hsa-mir-17	miR2Disease
Prostate Neoplasms	hsa-mir-34a	miR2Disease;dbDEMC
Prostate Neoplasms	hsa-mir-155	dbDEMC
Prostate Neoplasms	hsa-mir-20a	miR2Disease
Prostate Neoplasms	hsa-mir-146a	miR2Disease
Prostate Neoplasms	hsa-mir-143	miR2Disease;dbDEMC
Prostate Neoplasms	hsa-mir-126	miR2Disease;dbDEMC
Prostate Neoplasms	hsa-mir-221	miR2Disease;dbDEMC
Prostate Neoplasms	hsa-mir-200c	dbDEMC
Prostate Neoplasms	hsa-mir-31	miR2Disease;dbDEMC
Prostate Neoplasms	hsa-let-7a	miR2Disease;dbDEMC
Prostate Neoplasms	hsa-mir-200b	unconfirmed
Prostate Neoplasms	hsa-mir-182	miR2Disease;dbDEMC
Prostate Neoplasms	hsa-mir-16	miR2Disease;dbDEMC
Prostate Neoplasms	hsa-mir-92a	unconfirmed
Prostate Neoplasms	hsa-mir-18a	unconfirmed
Prostate Neoplasms	hsa-mir-200a	dbDEMC
Prostate Neoplasms	hsa-mir-222	miR2Disease;dbDEMC
Prostate Neoplasms	hsa-mir-1	dbDEMC
Prostate Neoplasms	hsa-let-7b	miR2Disease;dbDEMC
Prostate Neoplasms	hsa-mir-199a	miR2Disease;dbDEMC
Prostate Neoplasms	hsa-mir-100	miR2Disease;dbDEMC
Prostate Neoplasms	hsa-mir-146b	unconfirmed
Prostate Neoplasms	hsa-mir-223	miR2Disease;dbDEMC
Prostate Neoplasms	hsa-mir-34c	dbDEMC
Prostate Neoplasms	hsa-mir-19a	dbDEMC
Prostate Neoplasms	hsa-mir-203	unconfirmed
Prostate Neoplasms	hsa-mir-218	miR2Disease;dbDEMC
Prostate Neoplasms	hsa-mir-9	dbDEMC
Prostate Neoplasms	hsa-mir-210	miR2Disease
Prostate Neoplasms	hsa-mir-142	unconfirmed
Prostate Neoplasms	hsa-mir-375	miR2Disease;dbDEMC
Prostate Neoplasms	hsa-let-7c	miR2Disease;dbDEMC
Prostate Neoplasms	hsa-mir-19b	miR2Disease;dbDEMC
Prostate Neoplasms	hsa-mir-27a	miR2Disease;dbDEMC
Prostate Neoplasms	hsa-mir-205	miR2Disease;dbDEMC
Prostate Neoplasms	hsa-mir-181b	miR2Disease;dbDEMC
Prostate Neoplasms	hsa-mir-34b	dbDEMC
Prostate Neoplasms	hsa-mir-141	miR2Disease
Prostate Neoplasms	hsa-mir-10b	miR2Disease;dbDEMC
Prostate Neoplasms	hsa-mir-15a	miR2Disease;dbDEMC
Prostate Neoplasms	hsa-mir-148a	miR2Disease
Prostate Neoplasms	hsa-mir-181a	miR2Disease;dbDEMC
Prostate Neoplasms	hsa-mir-29b	miR2Disease;dbDEMC
Prostate Neoplasms	hsa-let-7d	miR2Disease;dbDEMC
Prostate Neoplasms	hsa-mir-101	miR2Disease;dbDEMC
Prostate Neoplasms	hsa-mir-93	unconfirmed
Prostate Neoplasms	hsa-mir-214	miR2Disease;dbDEMC
Prostate Neoplasms	hsa-mir-124	dbDEMC
10 of top-10 miRNA-disease associations have been confirmed!
17 of top-20 miRNA-disease associations have been confirmed!
43 of top-50 miRNA-disease associations have been confirmed!

## Sheet: Breast Neoplasms
Breast Neoplasms	hsa-mir-142	unconfirmed
Breast Neoplasms	hsa-mir-106a	dbDEMC
Breast Neoplasms	hsa-mir-150	dbDEMC
Breast Neoplasms	hsa-mir-99a	dbDEMC
Breast Neoplasms	hsa-mir-138	dbDEMC
Breast Neoplasms	hsa-mir-130a	dbDEMC
Breast Neoplasms	hsa-mir-378a	unconfirmed
Breast Neoplasms	hsa-mir-15b	dbDEMC
Breast Neoplasms	hsa-mir-192	dbDEMC
Breast Neoplasms	hsa-mir-185	dbDEMC
Breast Neoplasms	hsa-mir-196b	dbDEMC
Breast Neoplasms	hsa-mir-330	dbDEMC
Breast Neoplasms	hsa-mir-186	dbDEMC
Breast Neoplasms	hsa-mir-98	miR2Disease;dbDEMC
Breast Neoplasms	hsa-mir-212	dbDEMC
Breast Neoplasms	hsa-mir-92b	dbDEMC
Breast Neoplasms	hsa-mir-130b	dbDEMC
Breast Neoplasms	hsa-mir-542	unconfirmed
Breast Neoplasms	hsa-mir-30e	unconfirmed
Breast Neoplasms	hsa-mir-99b	dbDEMC
Breast Neoplasms	hsa-mir-574	dbDEMC
Breast Neoplasms	hsa-mir-372	dbDEMC
Breast Neoplasms	hsa-mir-181c	dbDEMC
Breast Neoplasms	hsa-mir-449a	unconfirmed
Breast Neoplasms	hsa-mir-32	dbDEMC
Breast Neoplasms	hsa-mir-92	dbDEMC
Breast Neoplasms	hsa-mir-527	dbDEMC
Breast Neoplasms	hsa-mir-522	unconfirmed
Breast Neoplasms	hsa-mir-517c	dbDEMC
Breast Neoplasms	hsa-mir-500b	unconfirmed
Breast Neoplasms	hsa-mir-26	unconfirmed
Breast Neoplasms	hsa-mir-1301	unconfirmed
Breast Neoplasms	hsa-mir-1234	unconfirmed
Breast Neoplasms	hsa-mir-1231	unconfirmed
Breast Neoplasms	hsa-mir-1202	unconfirmed
Breast Neoplasms	hsa-mir-181d	miR2Disease;dbDEMC
Breast Neoplasms	hsa-mir-370	dbDEMC
Breast Neoplasms	hsa-mir-95	dbDEMC
Breast Neoplasms	hsa-mir-211	dbDEMC
Breast Neoplasms	hsa-mir-449b	unconfirmed
Breast Neoplasms	hsa-mir-938	unconfirmed
Breast Neoplasms	hsa-mir-610	dbDEMC
Breast Neoplasms	hsa-mir-605	unconfirmed
Breast Neoplasms	hsa-mir-595	dbDEMC
Breast Neoplasms	hsa-mir-591	unconfirmed
Breast Neoplasms	hsa-mir-577	unconfirmed
Breast Neoplasms	hsa-mir-570	dbDEMC
Breast Neoplasms	hsa-mir-551a	dbDEMC
Breast Neoplasms	hsa-mir-524	dbDEMC
Breast Neoplasms	hsa-mir-518f	dbDEMC
8 of top-10 miRNA-disease associations have been confirmed!
16 of top-20 miRNA-disease associations have been confirmed!
33 of top-50 miRNA-disease associations have been confirmed!

## Sheet: Lung Neoplasms
Lung Neoplasms	hsa-mir-16	miR2Disease;dbDEMC
Lung Neoplasms	hsa-mir-15a	dbDEMC
Lung Neoplasms	hsa-mir-195	miR2Disease;dbDEMC
Lung Neoplasms	hsa-mir-106b	dbDEMC
Lung Neoplasms	hsa-mir-141	miR2Disease;dbDEMC
Lung Neoplasms	hsa-mir-99a	miR2Disease;dbDEMC
Lung Neoplasms	hsa-mir-429	miR2Disease;dbDEMC
Lung Neoplasms	hsa-mir-302b	dbDEMC
Lung Neoplasms	hsa-mir-296	dbDEMC
Lung Neoplasms	hsa-mir-151a	unconfirmed
Lung Neoplasms	hsa-mir-122	unconfirmed
Lung Neoplasms	hsa-mir-130a	miR2Disease;dbDEMC
Lung Neoplasms	hsa-mir-451a	unconfirmed
Lung Neoplasms	hsa-mir-193b	dbDEMC
Lung Neoplasms	hsa-mir-15b	dbDEMC
Lung Neoplasms	hsa-mir-378a	unconfirmed
Lung Neoplasms	hsa-mir-20b	dbDEMC
Lung Neoplasms	hsa-mir-302c	dbDEMC
Lung Neoplasms	hsa-mir-204	miR2Disease
Lung Neoplasms	hsa-mir-320a	unconfirmed
Lung Neoplasms	hsa-mir-194	unconfirmed
Lung Neoplasms	hsa-mir-302a	unconfirmed
Lung Neoplasms	hsa-mir-149	dbDEMC
Lung Neoplasms	hsa-mir-708	unconfirmed
Lung Neoplasms	hsa-mir-10a	dbDEMC
Lung Neoplasms	hsa-mir-373	dbDEMC
Lung Neoplasms	hsa-mir-342	dbDEMC
Lung Neoplasms	hsa-mir-139	miR2Disease;dbDEMC
Lung Neoplasms	hsa-mir-23b	dbDEMC
Lung Neoplasms	hsa-mir-196b	dbDEMC
Lung Neoplasms	hsa-mir-625	unconfirmed
Lung Neoplasms	hsa-mir-152	dbDEMC
Lung Neoplasms	hsa-mir-129	unconfirmed
Lung Neoplasms	hsa-mir-367	unconfirmed
Lung Neoplasms	hsa-mir-302d	dbDEMC
Lung Neoplasms	hsa-mir-452	unconfirmed
Lung Neoplasms	hsa-mir-328	dbDEMC
Lung Neoplasms	hsa-mir-215	dbDEMC
Lung Neoplasms	hsa-mir-92b	unconfirmed
Lung Neoplasms	hsa-mir-130b	dbDEMC
Lung Neoplasms	hsa-mir-99b	unconfirmed
Lung Neoplasms	hsa-mir-339	miR2Disease;dbDEMC
Lung Neoplasms	hsa-mir-148b	dbDEMC
Lung Neoplasms	hsa-mir-372	unconfirmed
Lung Neoplasms	hsa-mir-423	miR2Disease
Lung Neoplasms	hsa-mir-520a	unconfirmed
Lung Neoplasms	hsa-mir-449a	unconfirmed
Lung Neoplasms	hsa-mir-181d	dbDEMC
Lung Neoplasms	hsa-mir-520d	dbDEMC
Lung Neoplasms	hsa-mir-370	unconfirmed
9 of top-10 miRNA-disease associations have been confirmed!
15 of top-20 miRNA-disease associations have been confirmed!
32 of top-50 miRNA-disease associations have been confirmed!

## Sheet: Lymphoma
Lymphoma	hsa-mir-145	dbDEMC
Lymphoma	hsa-mir-34a	dbDEMC
Lymphoma	hsa-mir-125b	unconfirmed
Lymphoma	hsa-mir-221	dbDEMC
Lymphoma	hsa-mir-143	dbDEMC
Lymphoma	hsa-let-7a	dbDEMC
Lymphoma	hsa-mir-31	dbDEMC
Lymphoma	hsa-mir-34c	unconfirmed
Lymphoma	hsa-mir-223	dbDEMC
Lymphoma	hsa-mir-1	dbDEMC
Lymphoma	hsa-mir-29a	dbDEMC
Lymphoma	hsa-mir-222	dbDEMC
Lymphoma	hsa-let-7b	dbDEMC
Lymphoma	hsa-mir-182	dbDEMC
Lymphoma	hsa-mir-10b	dbDEMC
Lymphoma	hsa-mir-9	dbDEMC
Lymphoma	hsa-mir-29b	dbDEMC
Lymphoma	hsa-mir-199a	dbDEMC
Lymphoma	hsa-mir-181b	dbDEMC
Lymphoma	hsa-mir-27a	dbDEMC
Lymphoma	hsa-mir-34b	dbDEMC
Lymphoma	hsa-mir-146b	unconfirmed
Lymphoma	hsa-let-7d	dbDEMC
Lymphoma	hsa-mir-205	dbDEMC
Lymphoma	hsa-let-7c	dbDEMC
Lymphoma	hsa-mir-142	unconfirmed
Lymphoma	hsa-mir-148a	dbDEMC
Lymphoma	hsa-mir-30a	dbDEMC
Lymphoma	hsa-mir-183	dbDEMC
Lymphoma	hsa-mir-7	dbDEMC
Lymphoma	hsa-let-7e	dbDEMC
Lymphoma	hsa-mir-106b	dbDEMC
Lymphoma	hsa-mir-100	dbDEMC
Lymphoma	hsa-mir-195	dbDEMC
Lymphoma	hsa-mir-196a	dbDEMC
Lymphoma	hsa-mir-214	dbDEMC
Lymphoma	hsa-mir-375	unconfirmed
Lymphoma	hsa-mir-141	dbDEMC
Lymphoma	hsa-mir-22	dbDEMC
Lymphoma	hsa-mir-93	dbDEMC
Lymphoma	hsa-let-7g	dbDEMC
Lymphoma	hsa-mir-106a	dbDEMC
Lymphoma	hsa-mir-25	dbDEMC
Lymphoma	hsa-let-7f	dbDEMC
Lymphoma	hsa-mir-224	dbDEMC
Lymphoma	hsa-let-7i	dbDEMC
Lymphoma	hsa-mir-199b	dbDEMC
Lymphoma	hsa-mir-30c	dbDEMC
Lymphoma	hsa-mir-127	dbDEMC
Lymphoma	hsa-mir-133a	dbDEMC
8 of top-10 miRNA-disease associations have been confirmed!
18 of top-20 miRNA-disease associations have been confirmed!
45 of top-50 miRNA-disease associations have been confirmed!

## Sheet: Hepatocellular cancer
Carcinoma, Hepatocellular	hsa-mir-143	dbDEMC；miR2Disease
Carcinoma, Hepatocellular	hsa-mir-34b	unconfirmed
Carcinoma, Hepatocellular	hsa-mir-9	miR2Disease
Carcinoma, Hepatocellular	hsa-mir-133a	miR2Disease
Carcinoma, Hepatocellular	hsa-mir-135b	unconfirmed
Carcinoma, Hepatocellular	hsa-mir-429	unconfirmed
Carcinoma, Hepatocellular	hsa-mir-27b	dbDEMC
Carcinoma, Hepatocellular	hsa-mir-185	dbDEMC;miR2Disease
Carcinoma, Hepatocellular	hsa-mir-193b	unconfirmed
Carcinoma, Hepatocellular	hsa-mir-132	miR2Disease
Carcinoma, Hepatocellular	hsa-mir-137	miR2Disease
Carcinoma, Hepatocellular	hsa-mir-204	unconfirmed
Carcinoma, Hepatocellular	hsa-mir-302a	unconfirmed
Carcinoma, Hepatocellular	hsa-mir-194	dbDEMC;miR2Disease
Carcinoma, Hepatocellular	hsa-mir-342	dbDEMC
Carcinoma, Hepatocellular	hsa-mir-149	unconfirmed
Carcinoma, Hepatocellular	hsa-mir-23b	miR2Disease
Carcinoma, Hepatocellular	hsa-mir-708	unconfirmed
Carcinoma, Hepatocellular	hsa-mir-26b	dbDEMC;miR2Disease
Carcinoma, Hepatocellular	hsa-mir-206	unconfirmed
Carcinoma, Hepatocellular	hsa-mir-367	unconfirmed
Carcinoma, Hepatocellular	hsa-mir-638	unconfirmed
Carcinoma, Hepatocellular	hsa-mir-625	unconfirmed
Carcinoma, Hepatocellular	hsa-mir-196b	unconfirmed
Carcinoma, Hepatocellular	hsa-mir-128	miR2Disease
Carcinoma, Hepatocellular	hsa-mir-302d	unconfirmed
Carcinoma, Hepatocellular	hsa-mir-452	unconfirmed
Carcinoma, Hepatocellular	hsa-mir-186	miR2Disease
Carcinoma, Hepatocellular	hsa-mir-328	miR2Disease
Carcinoma, Hepatocellular	hsa-mir-215	miR2Disease
Carcinoma, Hepatocellular	hsa-mir-769	unconfirmed
Carcinoma, Hepatocellular	hsa-mir-662	unconfirmed
Carcinoma, Hepatocellular	hsa-mir-654	unconfirmed
Carcinoma, Hepatocellular	hsa-mir-611	unconfirmed
Carcinoma, Hepatocellular	hsa-mir-600	unconfirmed
Carcinoma, Hepatocellular	hsa-mir-520h	unconfirmed
Carcinoma, Hepatocellular	hsa-mir-520a	unconfirmed
Carcinoma, Hepatocellular	hsa-mir-601	unconfirmed
Carcinoma, Hepatocellular	hsa-mir-30e	miR2Disease
Carcinoma, Hepatocellular	hsa-mir-718	unconfirmed
Carcinoma, Hepatocellular	hsa-mir-4306	unconfirmed
Carcinoma, Hepatocellular	hsa-mir-4257	unconfirmed
Carcinoma, Hepatocellular	hsa-mir-3186	unconfirmed
Carcinoma, Hepatocellular	hsa-mir-3130	unconfirmed
Carcinoma, Hepatocellular	hsa-mir-2355	unconfirmed
Carcinoma, Hepatocellular	hsa-mir-181	miR2Disease
Carcinoma, Hepatocellular	hsa-mir-1469	unconfirmed
Carcinoma, Hepatocellular	hsa-mir-1323	unconfirmed
Carcinoma, Hepatocellular	hsa-mir-1245b	unconfirmed
Carcinoma, Hepatocellular	hsa-mir-1245a	unconfirmed
6 of top-10 miRNA-disease associations have been confirmed!
11 of top-20 miRNA-disease associations have been confirmed!
17 of top-50 miRNA-disease associations have been confirmed!
